# Supplementary material for: Dinuclear cobalt complexes supported by biphenol and binaphthol-derived bis(salicylaldimine) ligands: synthesis, characterization and catalytic application in β-enaminone synthesis from 1,3-dicarbonyl compounds and aliphatic amines
Source: Royal Society of Chemistry journal article supplement (doi:10.1039/d0nj00052c), 2020-01-01
Supplement: d0nj00052c1.pdf [file d0nj00052c1.pdf]

## Supplementary Information

### New Journal of Chemistry

(Manuscript ID NJ-ART-01-2020-00005)

**Dinuclear cobalt complexes supported by biphenol and binaphthol-derived bis (salicylaldimine) ligands: Synthesis, characterization and catalytic application in  $\beta$ -enaminones synthesis from 1, 3-dicarbonyl compounds and Aliphatic amines**

**Dr. Adelew Estifanos Filkale<sup>a,\*</sup> Dr. Chandni Pathak<sup>b</sup>**

<sup>a</sup>Department of Chemistry, College of Computational & Natural Sciences, Hawassa University, P.O. Box,05, Ethiopia

<sup>b</sup>Department of Applied Chemistry, Jabalpur Engineering College, Jabalpur, M.P.,

## Table of Contents

|                                                                                                                                                                                                                                                   |           |
|---------------------------------------------------------------------------------------------------------------------------------------------------------------------------------------------------------------------------------------------------|-----------|
| <b>Table 1S. Solvent variation study for the <math>\beta</math>-enaminone reaction of acetyl acetone and methyl amine as catalyzed by the dinuclear [CoL1]2 (2) and [CoL2]2 (4) complexes</b>                                                     | <b>6</b>  |
| <b>Table 2S. Time variation study for the <math>\beta</math>-enaminone reaction of acetyl acetone and methyl amine as catalyzed by the dinuclear [CoL1]2 (2) and [CoL2]2 (4) complexes.</b>                                                       | <b>7</b>  |
| <b>Table 3S. Selected results of blank, control and mercury drop experiments for the <math>\beta</math>-enaminone reaction of acetyl acetone and methylamine as catalyzed by the dinuclear [CoL1]2 (2) and [CoL2]2 (4) complexes<sup>a</sup>.</b> | <b>8</b>  |
| <b>Fig. S1 <sup>1</sup>H NMR spectrum of 1 in CDCl<sub>3</sub>.</b>                                                                                                                                                                               | <b>9</b>  |
| <b>Fig. S2 Expanded <sup>1</sup>H NMR spectrum of 1 in CDCl<sub>3</sub>.</b>                                                                                                                                                                      | <b>10</b> |
| <b>Fig. S3 <sup>13</sup>C{<sup>1</sup>H} NMR spectrum of 1 in CDCl<sub>3</sub>.</b>                                                                                                                                                               | <b>11</b> |
| <b>Fig. S4 Infrared spectrum of 1 in KBr.</b>                                                                                                                                                                                                     | <b>12</b> |
| <b>Fig. S5 High Resolution Mass Spectrometry (HRMS) data of 1.</b>                                                                                                                                                                                | <b>13</b> |
| <b>Fig. S6 Elemental analysis data of 1.</b>                                                                                                                                                                                                      | <b>14</b> |
| <b>Fig. S7 Infrared spectrum of 2 in KBr.</b>                                                                                                                                                                                                     | <b>15</b> |
| <b>Table 4S. Important IR bands of 1(H<sub>2</sub>L<sup>1</sup>) and 3 (H<sub>2</sub>L<sup>2</sup>) dinuclear complexes 2 and 4</b>                                                                                                               | <b>16</b> |
| <b>Table 5S. UV-Visible spectra of 1, 2, 3 and 4</b>                                                                                                                                                                                              | <b>17</b> |
| <b>Fig. S8 High Resolution Mass Spectrometry (HRMS) data of 2.</b>                                                                                                                                                                                | <b>18</b> |
| <b>Fig. S9 Elemental analysis data of 2.</b>                                                                                                                                                                                                      | <b>19</b> |

|                 |                                                                                                                                                                                                                                                              |           |
|-----------------|--------------------------------------------------------------------------------------------------------------------------------------------------------------------------------------------------------------------------------------------------------------|-----------|
| <b>Fig. S10</b> | <b><i><sup>1</sup>H NMR spectrum of 3 in CDCl<sub>3</sub>.</i></b>                                                                                                                                                                                           | <b>20</b> |
| <b>Fig S11</b>  | <b><i>Expanded <sup>1</sup>H NMR spectrum of 3 in CDCl<sub>3</sub>.</i></b>                                                                                                                                                                                  | <b>21</b> |
| <b>Fig. S12</b> | <b><i><sup>13</sup>C{<sup>1</sup>H} NMR spectrum of 3 in CDCl<sub>3</sub>.</i></b>                                                                                                                                                                           | <b>22</b> |
| <b>Fig S13</b>  | <b><i>Expanded <sup>13</sup>C{<sup>1</sup>H} NMR spectrum of 3 in CDCl<sub>3</sub>.</i></b>                                                                                                                                                                  | <b>23</b> |
| <b>Fig.S14</b>  | <b><i>Infrared spectrum of 3 in KBr.</i></b>                                                                                                                                                                                                                 | <b>24</b> |
| <b>Fig. S15</b> | <b><i>High Resolution Mass Spectrometry (HRMS) data of 3.</i></b>                                                                                                                                                                                            | <b>25</b> |
| <b>Fig. S16</b> | <b><i>Elemental analysis data of 3.</i></b>                                                                                                                                                                                                                  | <b>26</b> |
| <b>Fig. S17</b> | <b><i>Infrared spectrum of 4 in KBr.</i></b>                                                                                                                                                                                                                 | <b>27</b> |
| <b>Fig. S18</b> | <b><i>High Resolution Mass Spectrometry (HRMS) data of 4.</i></b>                                                                                                                                                                                            | <b>28</b> |
| <b>Fig.S19</b>  | <b><i>Elemental analysis data of 4.</i></b>                                                                                                                                                                                                                  | <b>29</b> |
| <b>Fig. S20</b> | <b><i><sup>1</sup>H NMR spectrum of 5 in CDCl<sub>3</sub> formed in the reaction of acetyl acetone and methyl amine as catalyzed by the dinuclear [CoL<sup>1</sup>]<sub>2</sub> (2) and [CoL<sup>2</sup>]<sub>2</sub> (4) complexes.</i></b>                 | <b>30</b> |
| <b>Fig. S21</b> | <b><i>Expanded <sup>1</sup>H NMR spectrum of 5 in CDCl<sub>3</sub> formed in the reaction of acetyl acetone and methyl amine as catalyzed by the dinuclear [CoL<sup>1</sup>]<sub>2</sub> (2) and [CoL<sup>2</sup>]<sub>2</sub> (4) complexes.</i></b>        | <b>31</b> |
| <b>Fig. S22</b> | <b><i><sup>13</sup>C{<sup>1</sup>H} NMR spectrum of 5 in CDCl<sub>3</sub> formed in the reaction of acetyl acetone and methyl amine as catalyzed by the dinuclear [CoL<sup>1</sup>]<sub>2</sub> (2) and [CoL<sup>2</sup>]<sub>2</sub> (4) complexes.</i></b> | <b>32</b> |
| <b>Fig. S23</b> | <b><i>GCMS trace of 5 (m/z 113) in EtOAc formed in the reaction of acetyl acetone and methyl amine as catalyzed by the the dinuclear [CoL<sup>1</sup>]<sub>2</sub> (2) and [CoL<sup>2</sup>]<sub>2</sub> (4) complexes.</i></b>                              | <b>33</b> |
| <b>Fig.S24</b>  | <b><i>Elemental analysis data of 5 formed in the reaction of acetyl acetone and methyl amine as catalyzed by the dinuclear [CoL<sup>1</sup>]<sub>2</sub> (2) and [CoL<sup>2</sup>]<sub>2</sub> (4) complexes.</i></b>                                        | <b>34</b> |
| <b>Fig. S25</b> | <b><i><sup>1</sup>H NMR spectrum of 6 in CDCl<sub>3</sub> formed in the reaction of acetyl acetone and ethyl amine as catalyzed by the dinuclear [CoL<sup>1</sup>]<sub>2</sub> (2) and [CoL<sup>2</sup>]<sub>2</sub> (4) complexes.</i></b>                  | <b>35</b> |
| <b>Fig. S26</b> | <b><i>Expanded <sup>1</sup>H NMR spectrum of 6 in CDCl<sub>3</sub> formed in the reaction of acetyl acetone and ethyl amine as catalyzed by the dinuclear [CoL<sup>1</sup>]<sub>2</sub> (2) and [CoL<sup>2</sup>]<sub>2</sub> (4) complexes.</i></b>         | <b>36</b> |
| <b>Fig. S27</b> | <b><i><sup>13</sup>C{<sup>1</sup>H} NMR spectrum of 6 in CDCl<sub>3</sub> formed in the reaction of acetyl acetone and ethyl amine as catalyzed by the dinuclear [CoL<sup>1</sup>]<sub>2</sub> (2) and [CoL<sup>2</sup>]<sub>2</sub> (4) complexes.</i></b>  | <b>37</b> |
| <b>Fig. S28</b> | <b><i>GCMS trace of 6 (m/z 127) in EtOAc formed in the reaction of acetyl acetone and ethyl amine as catalyzed by the the dinuclear [CoL<sup>1</sup>]<sub>2</sub> (2) and [CoL<sup>2</sup>]<sub>2</sub> (4) complexes.</i></b>                               | <b>38</b> |
| <b>Fig. S29</b> | <b><i><sup>1</sup>H NMR spectrum of 7 in CDCl<sub>3</sub> formed in the reaction of acetyl acetone and n-propyl amine as catalyzed by the dinuclear [CoL<sup>1</sup>]<sub>2</sub> (2) and [CoL<sup>2</sup>]<sub>2</sub> (4) complexes.</i></b>               | <b>39</b> |
| <b>Fig. S30</b> | <b><i>Expanded <sup>1</sup>H NMR spectrum of 7 in CDCl<sub>3</sub> formed in the reaction of acetyl acetone and n-propyl amine as catalyzed by the dinuclear [CoL<sup>1</sup>]<sub>2</sub> (2) and [CoL<sup>2</sup>]<sub>2</sub> (4) complexes.</i></b>      | <b>40</b> |
| <b>Fig.S31</b>  | <b><i><sup>13</sup>C{<sup>1</sup>H} NMR spectrum of 7 in CDCl<sub>3</sub> formed in the reaction of acetyl acetone and ethyl amine as catalyzed by the dinuclear [CoL<sup>1</sup>]<sub>2</sub> (2) and [CoL<sup>2</sup>]<sub>2</sub> (4) complexes.</i></b>  | <b>41</b> |

|                                                                                                                                                                                                                                                                            |                 |
|----------------------------------------------------------------------------------------------------------------------------------------------------------------------------------------------------------------------------------------------------------------------------|-----------------|
| <b>Fig. S32 GCMS trace of 7 (m/z 141) in EtOAc formed in the reaction of acetyl acetone and n-propyl amine as catalyzed by the the dinuclear [CoL<sup>1</sup>]<sub>2</sub> (2) and [CoL<sup>2</sup>]<sub>2</sub> (4) complexes.</b>                                        | <b>__ 42</b>    |
| <b>Fig.S33 <sup>1</sup>H NMR spectrum of 8 in CDCl<sub>3</sub>formed in the reaction of acetyl acetone and i-propyl amine as catalyzed by the dinuclear [CoL<sup>1</sup>]<sub>2</sub> (2) and [CoL<sup>2</sup>]<sub>2</sub> (4) complexes.</b>                             | <b>_____ 43</b> |
| <b>Fig. S34 Expanded <sup>1</sup>H NMR spectrum of 8 in CDCl<sub>3</sub>formed in the reaction of acetyl acetone and i-propyl amine as catalyzed by the dinuclear [CoL<sup>1</sup>]<sub>2</sub> (2) and [CoL<sup>2</sup>]<sub>2</sub> (4) complexes.</b>                   | <b>__ 44</b>    |
| <b>Fig. S35 <sup>13</sup>C{<sup>1</sup>H} NMR spectrum of 8 in CDCl<sub>3</sub> formed in the reaction of acetyl acetone and ethyl amine as catalyzed by the dinuclear [CoL<sup>1</sup>]<sub>2</sub> (2) and [CoL<sup>2</sup>]<sub>2</sub> (4) complexes</b>               | <b>_____ 45</b> |
| <b>Fig. S36 GCMS trace of 8 (m/z 141) in EtOAc formed in the reaction of acetyl acetone and i-propyl amine as catalyzed by the the dinuclear [CoL<sup>1</sup>]<sub>2</sub> (2) and [CoL<sup>2</sup>]<sub>2</sub> (4) complexes.</b>                                        | <b>__ 46</b>    |
| <b>Fig. S37 <sup>1</sup>H NMR spectrum of 9 in CDCl<sub>3</sub>formed in the reaction of acetyl acetone and n-butyl amine as catalyzed by the dinuclear [CoL<sup>1</sup>]<sub>2</sub> (2) and [CoL<sup>2</sup>]<sub>2</sub> (4) complexes.</b>                             | <b>_____ 47</b> |
| <b>Fig. S38 Expanded <sup>1</sup>H NMR spectrum of 9 in CDCl<sub>3</sub> formed in the reaction of acetyl acetone and n-butyl amine as catalyzed by the dinuclear [CoL<sup>1</sup>]<sub>2</sub> (2) and [CoL<sup>2</sup>]<sub>2</sub> (4) complexes</b>                    | <b>_____ 48</b> |
| <b>Fig. S39 <sup>13</sup>C{<sup>1</sup>H} NMR spectrum of 8 in CDCl<sub>3</sub>formed in the reaction of acetyl acetone and ethyl amine as catalyzed by the dinuclear [CoL<sup>1</sup>]<sub>2</sub> (2) and [CoL<sup>2</sup>]<sub>2</sub> (4) complexes.</b>               | <b>_____ 49</b> |
| <b>Fig. S40 GCMS trace of 9 (m/z 155) in EtOAc formed in the reaction of acetyl acetone and n-butyl amine as catalyzed by the the dinuclear [CoL<sup>1</sup>]<sub>2</sub> (2) and [CoL<sup>2</sup>]<sub>2</sub> (4) complexes.</b>                                         | <b>__ 50</b>    |
| <b>Fig. S41 <sup>1</sup>H NMR spectrum of 10 in CDCl<sub>3</sub>formed in the reaction of acetyl acetone and 2-picolyl amine as catalyzed by the dinuclear [CoL<sup>1</sup>]<sub>2</sub> (2) and [CoL<sup>2</sup>]<sub>2</sub> (4) complexes.</b>                          | <b>_____ 51</b> |
| <b>Fig. S42 Expanded <sup>1</sup>H NMR spectrum of 10 in CDCl<sub>3</sub>formed in the reaction of acetyl acetone and 2-picolyl amine as catalyzed by the dinuclear [CoL<sup>1</sup>]<sub>2</sub> (2) and [CoL<sup>2</sup>]<sub>2</sub> (4) complexes.</b>                 | <b>_____ 52</b> |
| <b>Fig. S43 <sup>13</sup>C{<sup>1</sup>H} NMR spectrum of 10 in CDCl<sub>3</sub>formed in the reaction of acetyl acetone and ethyl amine as catalyzed by the dinuclear [CoL<sup>1</sup>]<sub>2</sub> (2) and [CoL<sup>2</sup>]<sub>2</sub> (4) complexes.</b>              | <b>_____ 53</b> |
| <b>Fig.S44 GCMS trace of 10 (m/z 190) in EtOAc formed in the reaction of acetyl acetone and 2-picolyl amine as catalyzed by the the dinuclear [CoL<sup>1</sup>]<sub>2</sub> (2) and [CoL<sup>2</sup>]<sub>2</sub> (4) complexes.</b>                                       | <b>__ 54</b>    |
| <b>Fig. S45 <sup>1</sup>H NMR spectrum of 11 in CDCl<sub>3</sub>formed in the reaction of ethyl 2-oxocyclopentanecarboxylate and ethyl amine as catalyzed by the dinuclear [CoL<sup>1</sup>]<sub>2</sub> (2) and [CoL<sup>2</sup>]<sub>2</sub> (4) complexes.</b>          | <b>_____ 55</b> |
| <b>Fig. S46 Expanded <sup>1</sup>H NMR spectrum of 11 in CDCl<sub>3</sub>formed in the reaction of ethyl 2-oxocyclopentanecarboxylate and ethyl amine as catalyzed by the dinuclear [CoL<sup>1</sup>]<sub>2</sub> (2) and [CoL<sup>2</sup>]<sub>2</sub> (4) complexes.</b> | <b>_____ 56</b> |
| <b>Fig. S47 <sup>13</sup>C{<sup>1</sup>H} NMR spectrum of 11 in CDCl<sub>3</sub>formed in the reaction of acetyl acetone and ethyl amine as catalyzed by the dinuclear [CoL<sup>1</sup>]<sub>2</sub> (2) and [CoL<sup>2</sup>]<sub>2</sub> (4) complexes.</b>              | <b>_____ 57</b> |

|                                                                                                                                                                                                                                                                                                            |           |
|------------------------------------------------------------------------------------------------------------------------------------------------------------------------------------------------------------------------------------------------------------------------------------------------------------|-----------|
| <b>Fig. S48 GCMS trace of 11 (m/z 183) in EtOAc formed in the reaction of ethyl 2-oxocyclopentanecarboxylate and ethyl amine as catalyzed by the the dinuclear <math>[\text{CoL}^1]_2</math> (2) and <math>[\text{CoL}^2]_2</math> (4) complexes.</b>                                                      | <b>58</b> |
| <b>Fig.S49 Elemental analysis data of 11 formed in the reaction of ethyl 2-oxocyclopentanecarboxylate and ethyl amine as catalyzed by the dinuclear <math>[\text{CoL}^1]_2</math> (2) and <math>[\text{CoL}^2]_2</math> (4) complexes.</b>                                                                 | <b>59</b> |
| <b>Fig.S50 <math>^1\text{H}</math> NMR spectrum of 12 in <math>\text{CDCl}_3</math> formed in the reaction of ethyl 2-oxocyclopentanecarboxylate and n-propyl amine as catalyzed by the dinuclear <math>[\text{CoL}^1]_2</math> (2) and <math>[\text{CoL}^2]_2</math> (4) complexes.</b>                   | <b>60</b> |
| <b>Fig. S51 Expanded <math>^1\text{H}</math> NMR spectrum of 12 in <math>\text{CDCl}_3</math> formed in the reaction of ethyl 2-oxocyclopentanecarboxylate and n-propyl amine as catalyzed by the dinuclear <math>[\text{CoL}^1]_2</math> (2) and <math>[\text{CoL}^2]_2</math> (4) complexes.</b>         | <b>61</b> |
| <b>Fig. S52 <math>^{13}\text{C}\{^1\text{H}\}</math> NMR spectrum of 12 in <math>\text{CDCl}_3</math> formed in the reaction of ethyl 2-oxocyclopentanecarboxylate and n-propyl amine as catalyzed by the dinuclear <math>[\text{CoL}^1]_2</math> (2) and <math>[\text{CoL}^2]_2</math> (4) complexes.</b> | <b>62</b> |
| <b>Fig. S53 GCMS trace of 12 (m/z 197) in EtOAc formed in the reaction of ethyl 2-oxocyclopentanecarboxylate and n-propyl amine as catalyzed by the the dinuclear <math>[\text{CoL}^1]_2</math> (2) and <math>[\text{CoL}^2]_2</math> (4) complexes.</b>                                                   | <b>63</b> |
| <b>Fig. S54 Elemental analysis data of 12 formed in the reaction of ethyl 2-oxocyclopentanecarboxylate and n-propyl amine as catalyzed by the dinuclear <math>[\text{CoL}^1]_2</math> (2) and <math>[\text{CoL}^2]_2</math> (4) complexes.</b>                                                             | <b>64</b> |
| <b>Fig. S55 <math>^1\text{H}</math> NMR spectrum of 13 in <math>\text{CDCl}_3</math> formed in the reaction of ethyl 2-oxocyclopentanecarboxylate and i-propyl amine as catalyzed by the dinuclear <math>[\text{CoL}^1]_2</math> (2) and <math>[\text{CoL}^2]_2</math> (4) complexes.</b>                  | <b>65</b> |
| <b>Fig. S56 Expanded <math>^1\text{H}</math> NMR spectrum of 13 in <math>\text{CDCl}_3</math> formed in the reaction of ethyl 2-oxocyclopentanecarboxylate and i-propyl amine as catalyzed by the dinuclear <math>[\text{CoL}^1]_2</math> (2) and <math>[\text{CoL}^2]_2</math> (4) complexes</b>          | <b>66</b> |
| <b>Fig. S57 <math>^{13}\text{C}\{^1\text{H}\}</math> NMR spectrum of 13 in <math>\text{CDCl}_3</math> formed in the reaction of ethyl 2-oxocyclopentanecarboxylate and i-propyl amine as catalyzed by the dinuclear <math>[\text{CoL}^1]_2</math> (2) and <math>[\text{CoL}^2]_2</math> (4) complexes.</b> | <b>67</b> |
| <b>Fig. S58 GCMS trace of 13 (m/z 197) in EtOAc formed in the reaction of ethyl 2-oxocyclopentanecarboxylate and i-propyl amine as catalyzed by the the dinuclear <math>[\text{CoL}^1]_2</math> (2) and <math>[\text{CoL}^2]_2</math> (4) complexes</b>                                                    | <b>68</b> |
| <b>Fig. S59 Elemental analysis data of 13 formed in the reaction of ethyl 2-oxocyclopentanecarboxylate and i-propyl amine as catalyzed by the dinuclear <math>[\text{CoL}^1]_2</math> (2) and <math>[\text{CoL}^2]_2</math> (4) complexes</b>                                                              | <b>69</b> |
| <b>Fig. S60 <math>^1\text{H}</math> NMR spectrum of 14 in <math>\text{CDCl}_3</math> formed in the reaction of ethyl 2-oxocyclopentanecarboxylate and n-butyl amine as catalyzed by the dinuclear <math>[\text{CoL}^1]_2</math> (2) and <math>[\text{CoL}^2]_2</math> (4) complexes</b>                    | <b>70</b> |

|                                                                                                                                                                                                                                                               |    |
|---------------------------------------------------------------------------------------------------------------------------------------------------------------------------------------------------------------------------------------------------------------|----|
| <b>Fig. S61</b> Expanded $^1\text{H}$ NMR spectrum of 14 in $\text{CDCl}_3$ formed in the reaction of ethyl 2-oxocyclopentanecarboxylate and n-butyl amine as catalyzed by the dinuclear $[\text{CoL}^1]_2$ (2) and $[\text{CoL}^2]_2$ (4) complexes          | 71 |
| <b>Fig. S62</b> $^{13}\text{C}\{^1\text{H}\}$ NMR spectrum of 14 in $\text{CDCl}_3$ formed in the reaction of ethyl 2-oxocyclopentanecarboxylate and n-butyl amine as catalyzed by the dinuclear $[\text{CoL}^1]_2$ (2) and $[\text{CoL}^2]_2$ (4) complexes. | 72 |
| <b>Fig. S63</b> GCMS trace of 14 ( $m/z$ 211) in EtOAc formed in the reaction of ethyl 2-oxocyclopentanecarboxylate and n-butyl amine as catalyzed by the the dinuclear $[\text{CoL}^1]_2$ (2) and $[\text{CoL}^2]_2$ (4) complexes                           | 73 |
| <b>Fig. S64</b> Elemental analysis data of 14 formed in the reaction of ethyl 2-oxocyclopentanecarboxylate and n-butyl amine as catalyzed by the dinuclear $[\text{CoL}^1]_2$ (2) and $[\text{CoL}^2]_2$ (4) complexes.                                       | 74 |
| <b>Fig. S65</b> $^1\text{H}$ NMR spectrum of 5 in $\text{CDCl}_3$ formed in the reaction of acetyl acetone and methyl amine.                                                                                                                                  | 75 |
| <b>Fig. S66</b> GCMS trace of 5 ( $m/z$ 113) in EtOAc formed in the reaction of acetyl acetone and methyl amine.                                                                                                                                              | 76 |
| <b>Fig. S67</b> $^1\text{H}$ NMR spectrum of 5 in $\text{CDCl}_3$ formed in the reaction of acetyl acetone and methyl amine as catalyzed by $\text{Co}(\text{OAc})_2 \cdot 4\text{H}_2\text{O}$                                                               | 77 |
| <b>Fig. S68</b> GCMS trace of 5 ( $m/z$ 113) in EtOAc formed in the reaction of acetyl acetone and methyl amine as catalyzed by $\text{Co}(\text{OAc})_2 \cdot 4\text{H}_2\text{O}$                                                                           | 78 |
| <b>Fig. S69</b> $^1\text{H}$ NMR spectrum of 5 in $\text{CDCl}_3$ formed in the reaction of acetyl acetone and methyl amine as catalyzed by $\text{H}_2\text{L}^1$ (1).                                                                                       | 79 |
| <b>Fig. S70</b> GCMS trace of 5 ( $m/z$ 113) in EtOAc formed in the reaction of acetyl acetone and methyl amine as catalyzed by $\text{H}_2\text{L}^1$ (1).                                                                                                   | 80 |
| <b>Fig. S71</b> $^1\text{H}$ NMR spectrum of 5 in $\text{CDCl}_3$ formed in the reaction of acetyl acetone and methyl amine as catalyzed by $\text{H}_2\text{L}^2$ (3).                                                                                       | 81 |
| <b>Fig. S72</b> $^1\text{H}$ NMR spectrum of 5 in $\text{CDCl}_3$ formed in the reaction of acetyl acetone and methyl amine as catalyzed by the dinuclear $[\text{CoL}^1]_2$ (2) and $[\text{CoL}^2]_2$ (4) complexes in the presence of Hg                   | 82 |
| <b>Fig. S73</b> GCMS trace of 5 ( $m/z$ 113) in EtOAc formed in the reaction of acetyl acetone and methyl amine as catalyzed by the dinuclear $[\text{CoL}^1]_2$ (2) and $[\text{CoL}^2]_2$ (4) complexes in the presence of Hg.                              | 83 |

**Table 1S.** Solvent variation study for the  $\beta$ -enaminone reaction of acetyl acetone and methyl amine as catalyzed by the dinuclear [CoL1]2 (2) and [CoL2]2 (4) complexes

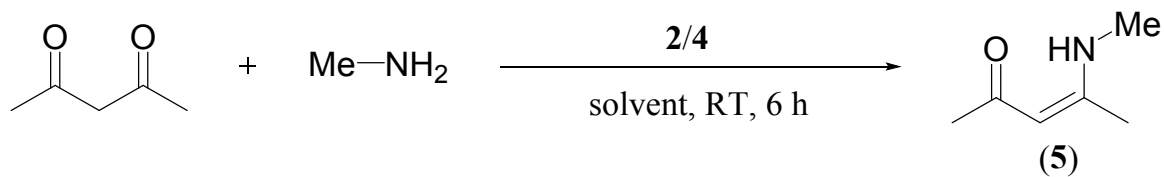

| S.No | Solvent                         | Yield <sup>b</sup> |     |
|------|---------------------------------|--------------------|-----|
|      |                                 | (2)                | (4) |
| 1    | CHCl <sub>3</sub>               | 89                 | 76  |
| 2    | CH <sub>2</sub> Cl <sub>2</sub> | 75                 | 71  |
| 3    | THF                             | 93                 | 89  |
| 4    | DMSO                            | 86                 | 77  |
| 5    | DMF                             | 63                 | 65  |

(a). Reaction conditions: 1.00 mmol of ketone, 4.0 mmol of amine, 1 mol % of catalyst (2/4), 2.5 mL of solvent at room temperature, stir for 6 h. (b) Isolated yields (%).

**Table 2S. Time variation study for the  $\beta$ -enaminone reaction of acetyl acetone and methyl amine as catalyzed by the dinuclear [CoL1]2 (2) and [CoL2]2 (4) complexes.**

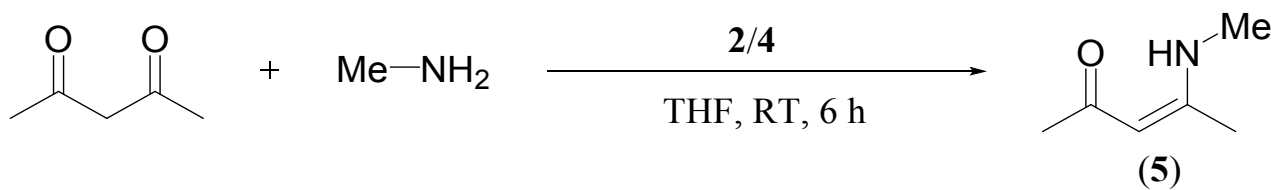

| S.No | Time (h) | Yield <sup>b</sup> |     |
|------|----------|--------------------|-----|
|      |          | (2)                | (4) |
| 1    | 0.5      | 63                 | 59  |
| 2    | 2        | 78                 | 63  |
| 3    | 4        | 83                 | 78  |
| 4    | 6        | 93                 | 89  |
| 5    | 12       | 90                 | 85  |

(a). Reaction conditions: 1.00 mmol of ketone, 4.0 mmol of amine, 1 mol % of catalyst (2/4), 2.5 mL of THF at room temperature, stir for the given time. (b). Isolated yields (%).

**Table 3S.** Selected results of blank, control and mercury drop experiments for the  $\beta$ -enaminone reaction of acetyl acetone and methylamine as catalyzed by the dinuclear [CoL1]2 (2) and [CoL2]2 (4) complexes.

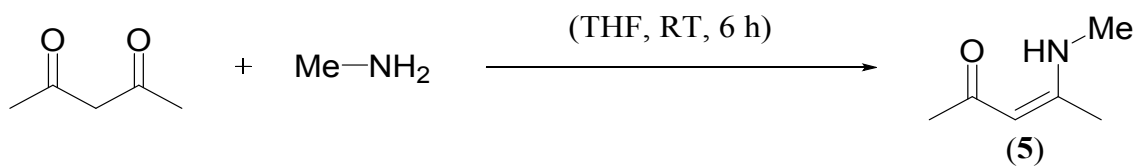

| S.No | Catalyst                                | Yield <sup>b</sup> | Hg/Yield <sup>b</sup> |
|------|-----------------------------------------|--------------------|-----------------------|
| 1    | (2) <sup>a</sup>                        | 93                 | 90                    |
| 2    | (4) <sup>a</sup>                        | 89                 | 87                    |
| 3    | -                                       | 40                 |                       |
| 4    | Co(OAc) <sub>2</sub> •4H <sub>2</sub> O | 42                 |                       |
| 5    | H <sub>2</sub> L <sup>1</sup> (1)       | 64                 |                       |
| 6    | H <sub>2</sub> L <sup>2</sup> (3)       | 67                 |                       |

(a). Reaction conditions: 1.00 mmol of ketone, 4.0 mmol of amine, 1 mol % of catalyst (2/4) or 2 mol % of Co(OAc)<sub>2</sub>•4H<sub>2</sub>O/H<sub>2</sub>L<sup>1</sup>/H<sub>2</sub>L<sup>2</sup>, 2.5 mL of THF at room temperature, stir for 6 h.

(b). Isolated yields (%).



PG-CP-14-46-1-1H

Current Data Parameters  
NAME PG-CP-14-46-1-1H  
EXPNO 1  
PROCNO 1

F2 - Acquisition Parameters  
Date\_ 20170806  
Time\_ 11.09  
INSTRUM spect  
PROBHD 5 mm PABBO BB-  
PULPROG zg30  
TD 54274  
SOLVENT CDCl3  
NS 10  
DS 0  
SWH 8223.685 Hz  
FIDRES 0.151522 Hz  
AQ 3.2998593 sec  
RG 32  
DW 60.800 usec  
DE 6.50 usec  
TE 298.1 K  
D1 2.00000000 sec  
TD0 1

===== CHANNEL f1 =====  
NUC1 1H  
P1 14.75 usec  
PL1 -1.00 dB  
PL1W 10.56200695 W  
SFO1 400.1324710 MHz

F2 - Processing parameters  
SI 32768  
SF 400.1300095 MHz  
WDW EM  
SSB 0  
LB 0.30 Hz  
GB 0  
PC 1.00

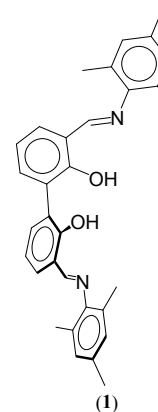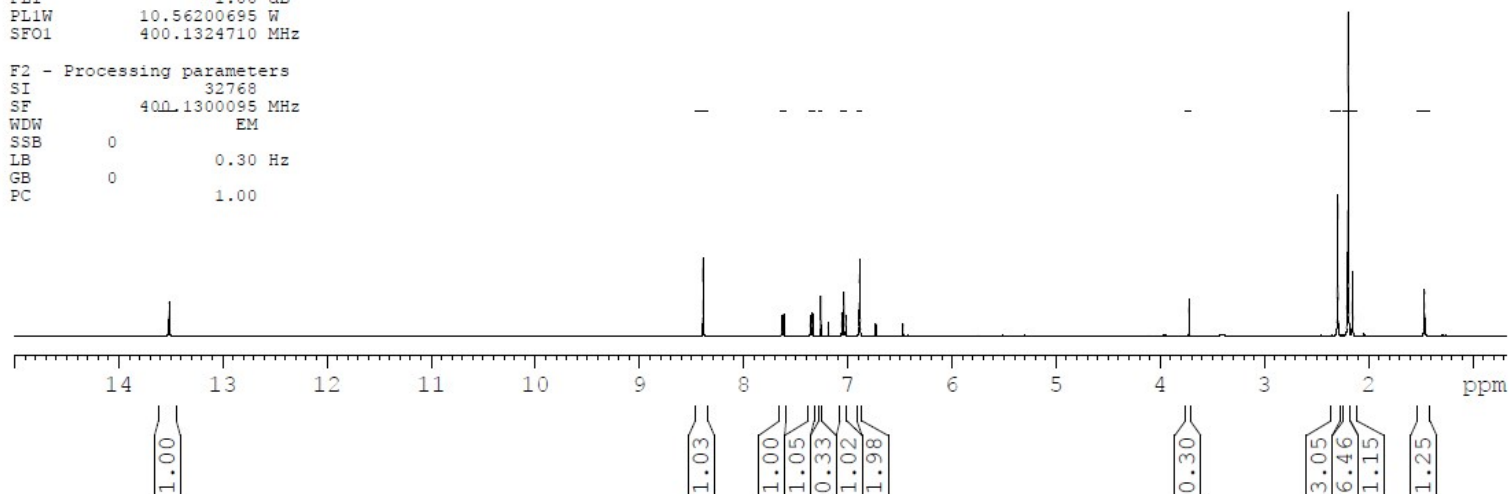

Fig. S1 <sup>1</sup>H NMR spectrum of **1** in CDCl<sub>3</sub>.

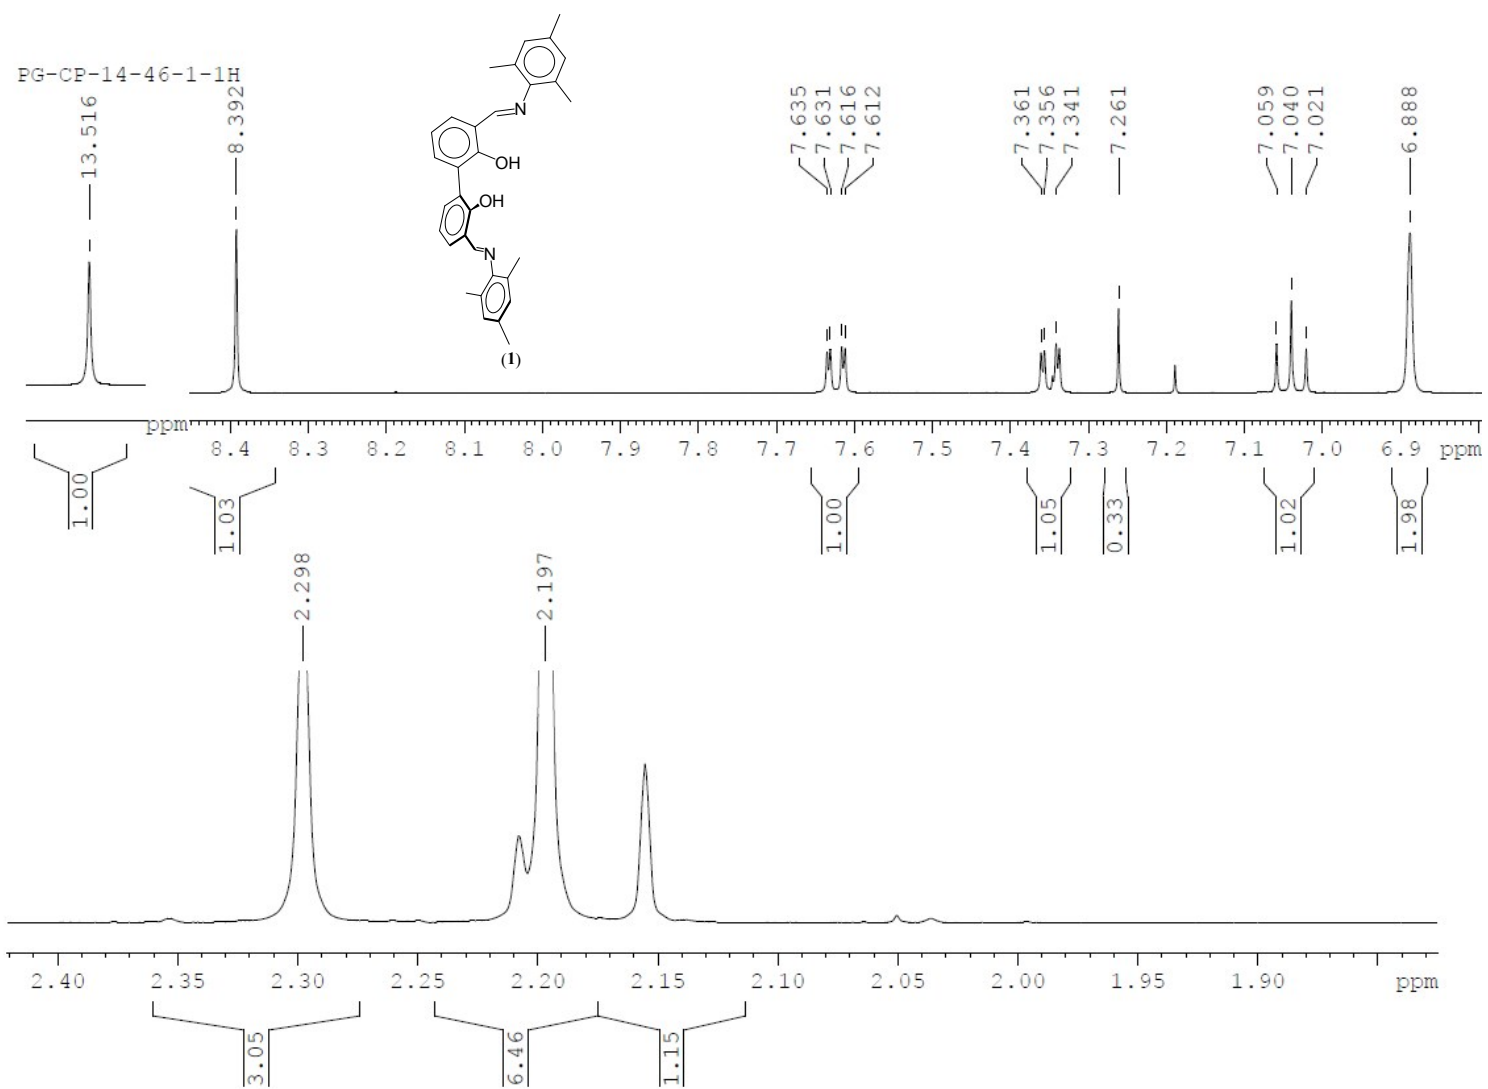

**Fig. S2** Expanded  $^1\text{H}$  NMR spectrum of **1** in  $\text{CDCl}_3$ .

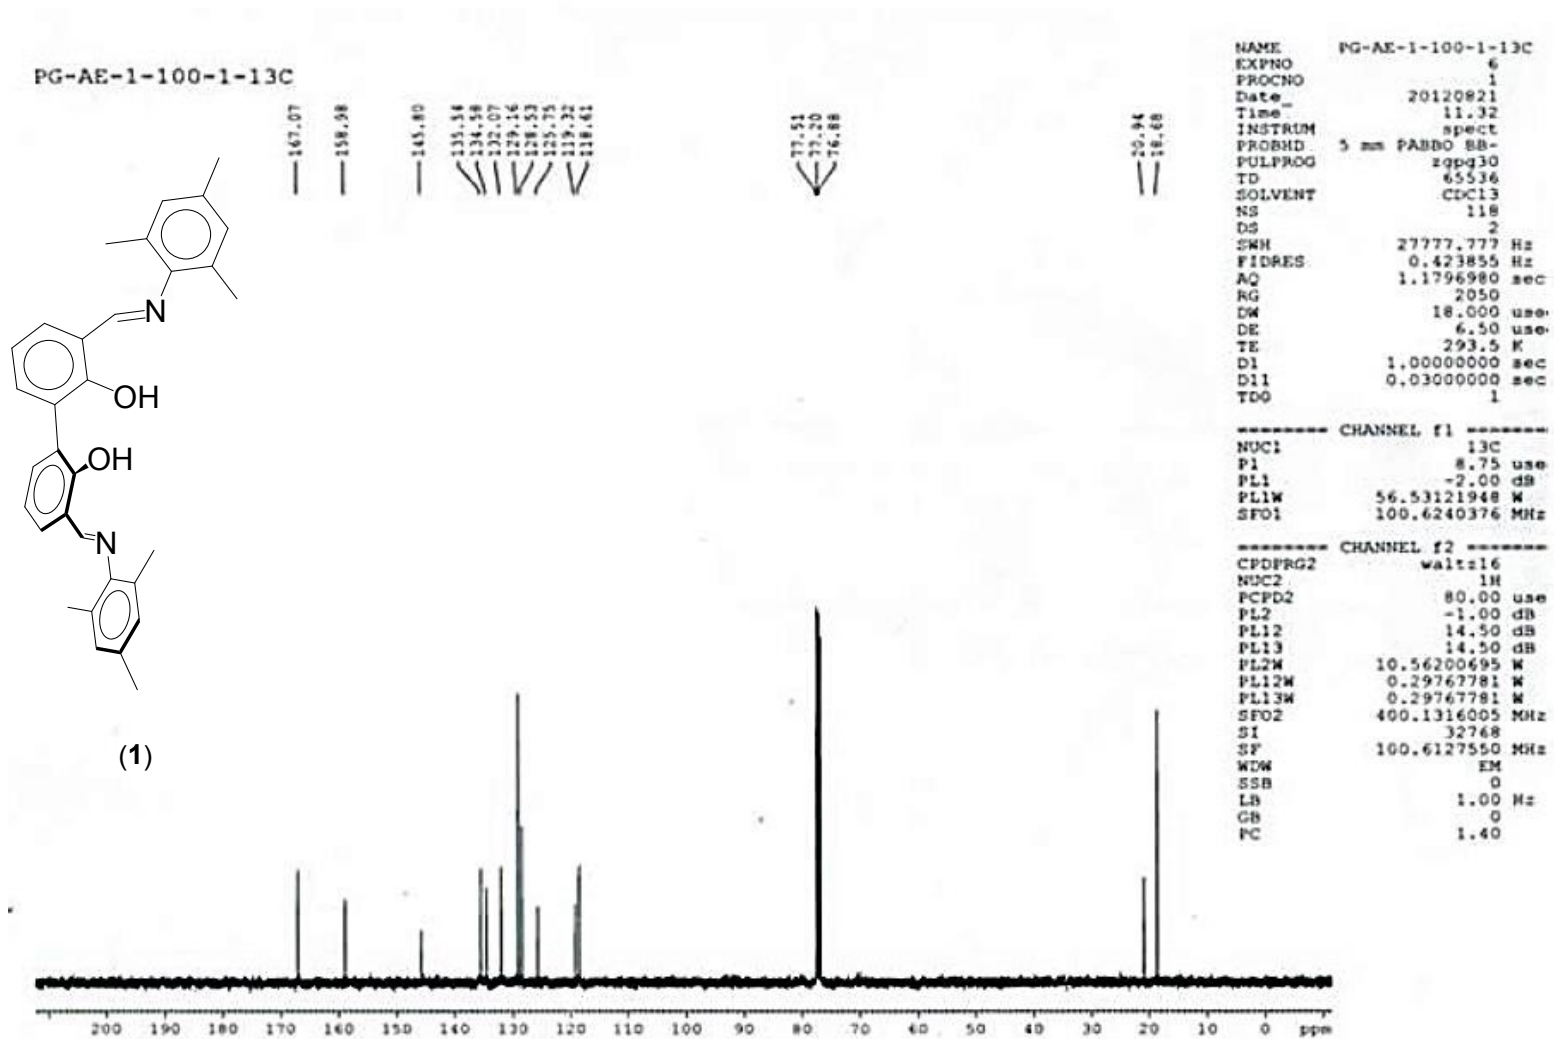

Fig. S3  $^{13}\text{C}\{^1\text{H}\}$  NMR spectrum of **1** in  $\text{CDCl}_3$ .

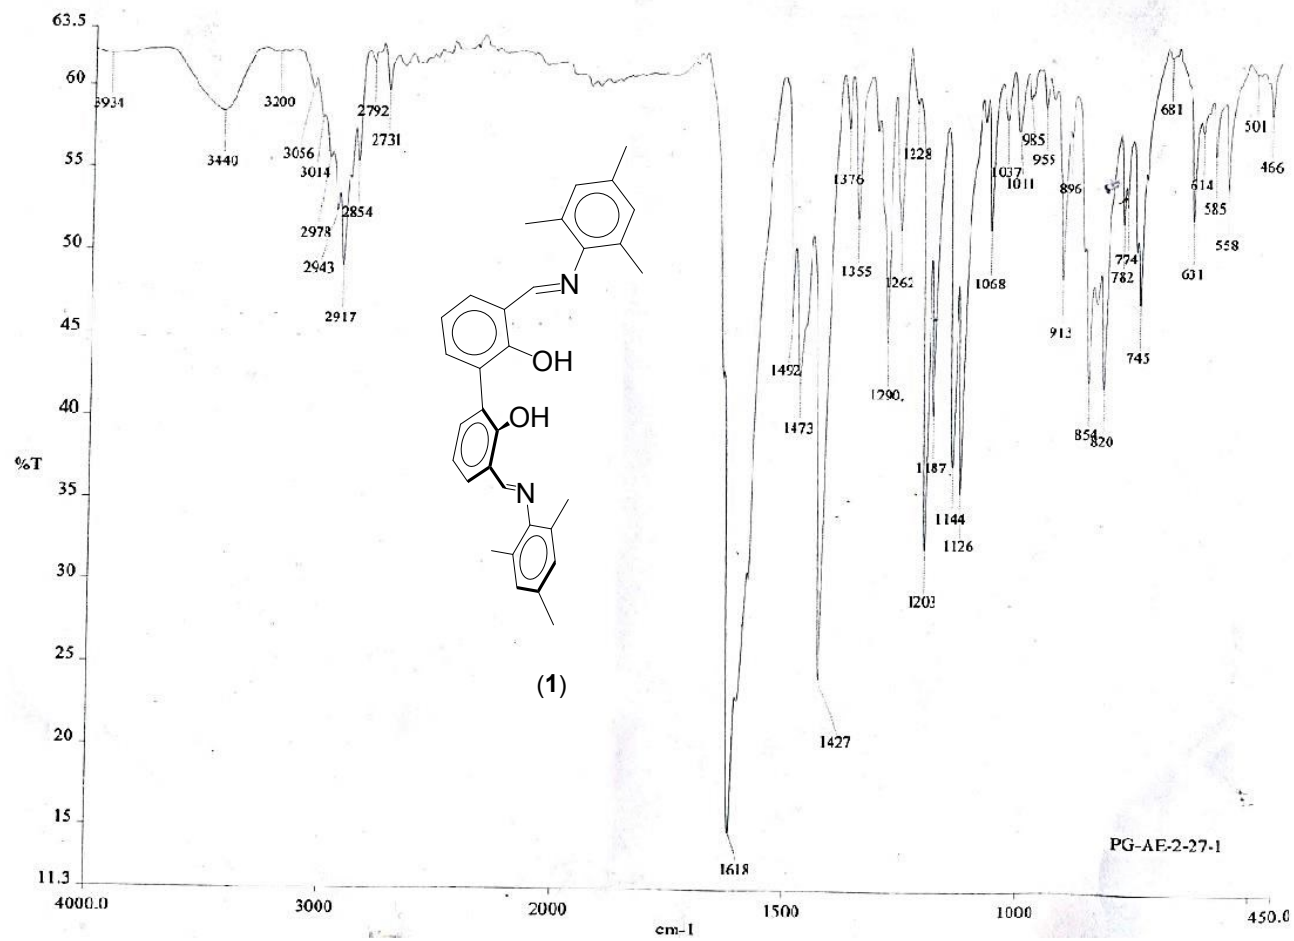

Fig. S4 Infrared spectrum of **1** in KBr.

DEPARTMENT OF CHEMISTRY, I.I.T.(B)

Analysis Info

Analysis Name D:\Data\May-2016\PG-AE-4-27.d  
 Method Tune\_pos\_NAICSI-1000.m  
 Sample Name PG-AE-4-27  
 Comment C32H32N2O2

Acquisition Date 5/4/2016 11:36:42 AM

Operator PG APP IN  
 Instrument maXis impact 282001.00081

Acquisition Parameter

Source Type ESI Ion Polarity Positive Set Nebulizer 0.3 Bar  
 Focus Active Set Capillary 3700 V Set Dry Heater 180 °C  
 Scan Begin 50 m/z Set End Plate Offset -500 V Set Dry Gas 4.0 l/min  
 Scan End 1000 m/z Set Collision Cell RF 1200.0 Vpp Set Divert Valve Source

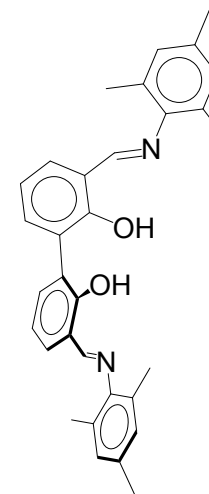

(1)

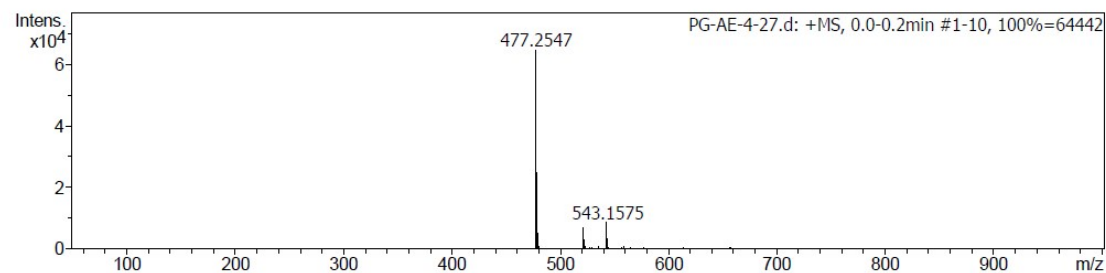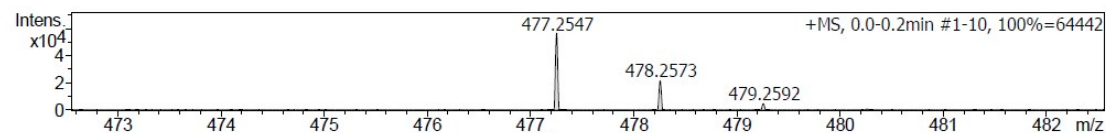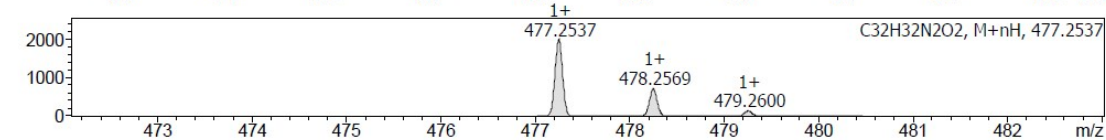

| Meas. m/z | # | Ion Formula | m/z      | err [ppm] | mSigma | # Sigma | Score  | rdb  | e <sup>-</sup> Conf | N-Rule |
|-----------|---|-------------|----------|-----------|--------|---------|--------|------|---------------------|--------|
| 477.2547  | 1 | C32H33N2O2  | 477.2537 | 2.3       | 14.3   | 1       | 100.00 | 17.5 | even                | ok     |

Fig. S5 High Resolution Mass Spectrometry (HRMS) data of 1.

# Eager 300 Report

Page: 1    Sample: PG-AE-2-27-1 (PG-AE-2-27-1)

|                                            |                                 |
|--------------------------------------------|---------------------------------|
| Method Name : PGCP16052016                 | Company Name : C.E. Instruments |
| Method File : D:\CHNS2016\PGCP16052016.mth | Printed : 5/17/2016 10:26       |
| Chromatogram : PG-AE-2-27-1                | Instrument N. : Instrument #1   |
| Operator ID : CHANDNI                      | Sample weight : .751            |
| Analysed : 05/16/2016 12:53                |                                 |
| Sample ID : PG-AE-2-27-1 (# 13)            |                                 |
| Analysis Type : UnkNown (Area)             |                                 |

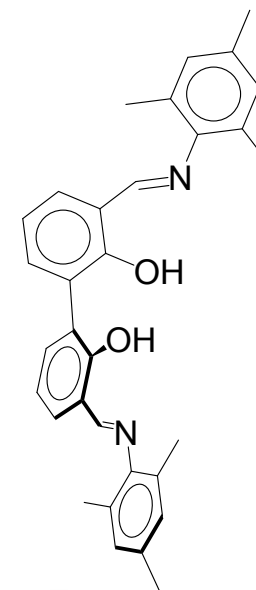

Calib. method : using 'K Factors'

!!! Warning missing one or more peaks.

| Element Name | %       | Ret.Time | Area    | BC | Area ratio | K factor    |
|--------------|---------|----------|---------|----|------------|-------------|
| 1            | 0.0000  | 2        | 31480   | FU |            | 0.0000      |
| 2            | 0.0000  | 6        | 99279   | FU |            | 0.0000      |
| Nitrogen     | 5.9177  | 43       | 47966   | RS | 33.450400  | .107929E+07 |
| Carbon       | 80.8003 | 65       | 1604465 | RS | 1.000000   | .264014E+07 |
| Hydrogen     | 5.9919  | 178      | 336173  | RS | 4.772736   | .705507E+07 |
| Totals       | 92.7099 |          | 2119363 |    |            |             |

(1)

Fig. S6 Elemental analysis data of 1.

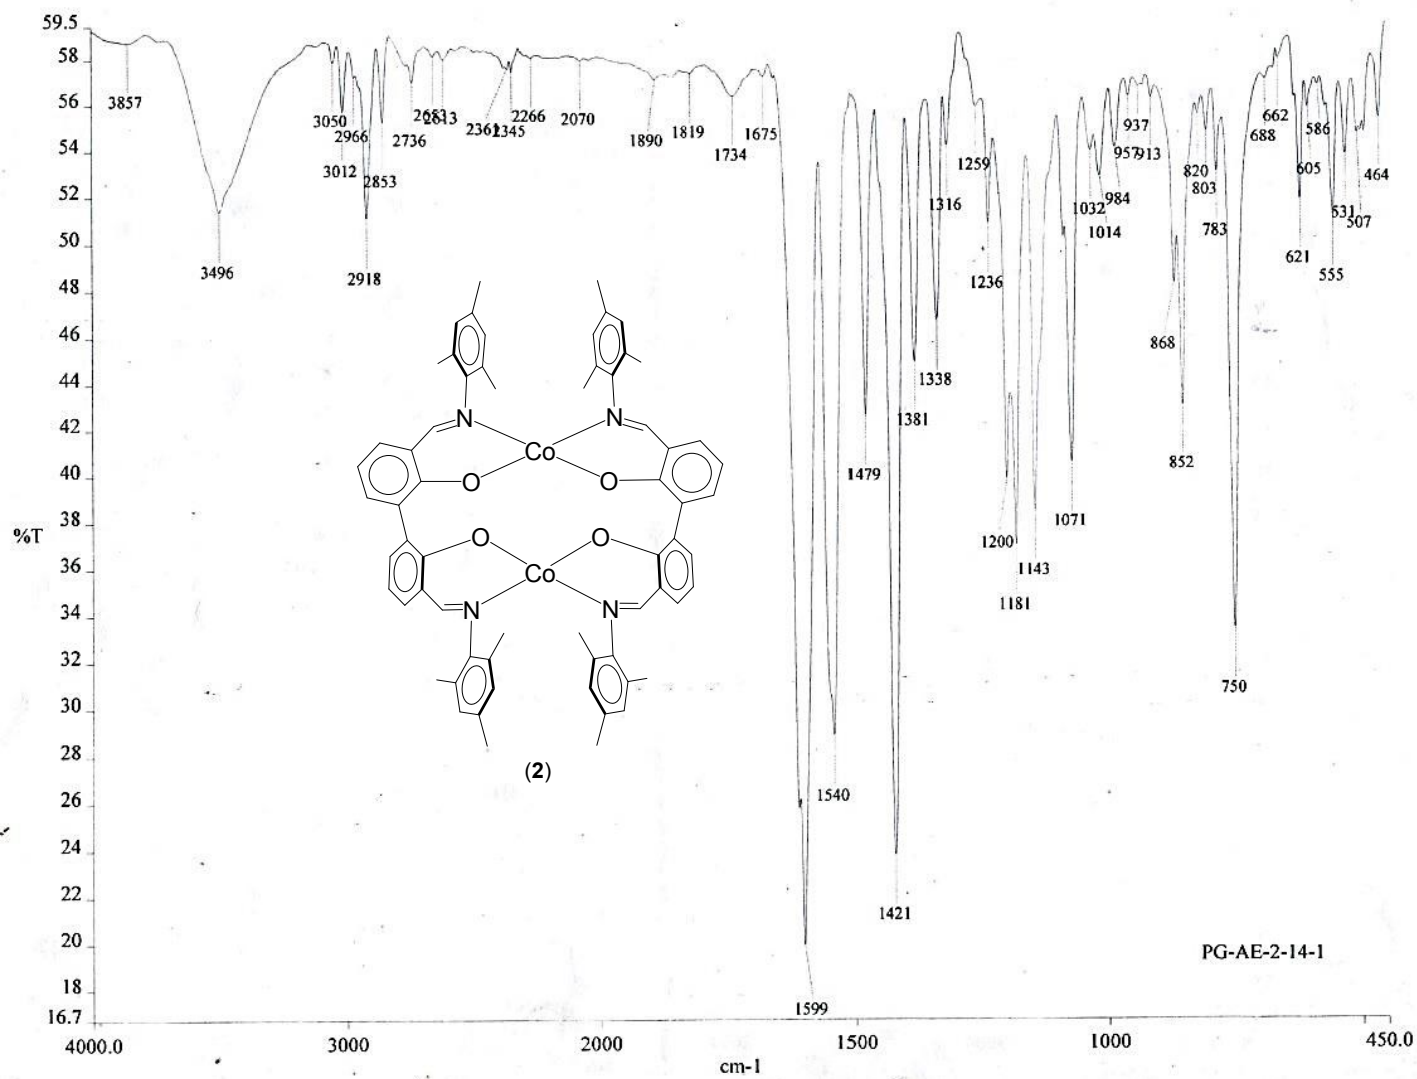

PG-AE-2-14-1

Fig. S7 Infrared spectrum of **2** in KBr.

**Table 4S.** Important IR bands of 1( $\text{H}_2\text{L}^1$ ) and 3 ( $\text{H}_2\text{L}^2$ ) dinuclear complexes **2** and **4**

| Compound                                    | $\nu_{(\text{O-H})/\text{H}_2\text{O}}$<br>( $\text{cm}^{-1}$ ) | $\nu_{(\text{C=N})}$<br>( $\text{cm}^{-1}$ ) | $\nu_{(\text{C-O})}$<br>( $\text{cm}^{-1}$ ) | $\nu_{(\text{C=C})}$<br>( $\text{cm}^{-1}$ ) |
|---------------------------------------------|-----------------------------------------------------------------|----------------------------------------------|----------------------------------------------|----------------------------------------------|
| <b><math>\text{H}_2\text{L}^1</math>(1)</b> | 3440                                                            | 1618                                         | 1203                                         | 1427                                         |
| <b>2</b>                                    | 3446                                                            | 1599                                         | 1143                                         | 1421                                         |
| <b><math>\text{H}_2\text{L}^2</math>(3)</b> | 3386                                                            | 1623                                         | 1255                                         | 1449                                         |
| <b>4</b>                                    | 3451                                                            | 1620                                         | 1254                                         | 1457                                         |



**Table 5S.** UV–Visible spectra of **1**, **2**, **3** and **4**

| <b>Compound</b>                       | $\lambda_{\text{max}}$ , nm | absorbance | $\epsilon$ , $\text{M}^{-1}\text{cm}^{-1}$ | transition              |
|---------------------------------------|-----------------------------|------------|--------------------------------------------|-------------------------|
| <b>H<sub>2</sub>L<sup>1</sup> (1)</b> | 236                         | 3.5        | 52000                                      | $\pi \rightarrow \pi^*$ |
|                                       | 341                         | 1.7        | 25000                                      | $n \rightarrow \pi^*$   |
| <b>2</b>                              | 230                         | 1.22       | 18000                                      | $\pi \rightarrow \pi^*$ |
|                                       | 280                         | 0.54       | 8000                                       | $n \rightarrow \pi^*$   |
|                                       | 393                         | 0.26       | 4000                                       | $d \rightarrow \pi^*$   |
| <b>H<sub>2</sub>L<sup>2</sup> (3)</b> | 244                         | 0.23       | 3400                                       | $\pi \rightarrow \pi^*$ |
|                                       | 342                         | 0.11       | 1600                                       | $n \rightarrow \pi^*$   |
| <b>4</b>                              | 260                         | 0.97       | 14000                                      | $\pi \rightarrow \pi^*$ |
|                                       | 306                         | 0.33       | 4900                                       | $n \rightarrow \pi^*$   |
|                                       | 350                         | 0.21       | 3100                                       | $d \rightarrow \pi^*$   |

## Indian Institute of Technology (B)

### Analysis Info

Analysis Name D:\Data\AUG\_13\PG-AE-2-14.d  
 Method Tune\_pos\_Standard\_NAI-2000.m  
 Sample Name PG-AE-2-14  
 Comment C64H60Co2N4O4

Acquisition Date 8/27/2013 12:44:25 PM

Operator MSB IN  
 Instrument maXis impact 282001.00081

### Acquisition Parameter

|             |          |                       |            |                  |           |
|-------------|----------|-----------------------|------------|------------------|-----------|
| Source Type | ESI      | Ion Polarity          | Positive   | Set Nebulizer    | 0.3 Bar   |
| Focus       | Active   | Set Capillary         | 3700 V     | Set Dry Heater   | 180 °C    |
| Scan Begin  | 50 m/z   | Set End Plate Offset  | -500 V     | Set Dry Gas      | 4.0 l/min |
| Scan End    | 2000 m/z | Set Collision Cell RF | 2100.0 Vpp | Set Divert Valve | Source    |

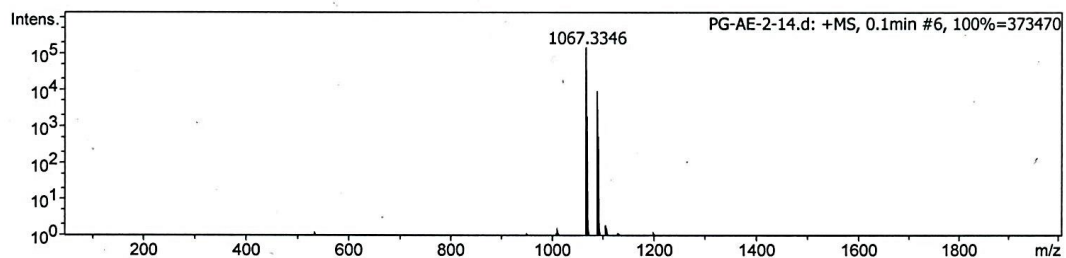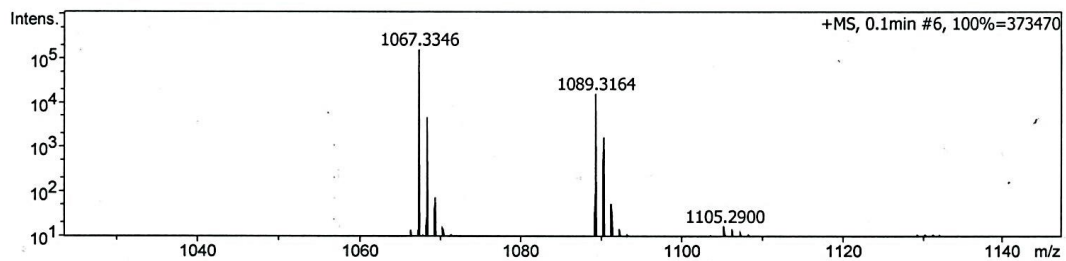

| Meas. m/z | # | Ion Formula     | m/z       | err [ppm] | mSigma | # Sigma | Score  | rdb  | e <sup>-</sup> Conf | N-Rule |
|-----------|---|-----------------|-----------|-----------|--------|---------|--------|------|---------------------|--------|
| 1067.3346 | 1 | C64H61Co2N4O4   | 1067.3351 | -0.5      | 45.9   | 1       | 100.00 | 36.5 | even                | ok     |
| 1089.3164 | 1 | C64H60Co2N4NaO4 | 1089.3171 | -0.6      | 20.3   | 1       | 100.00 | 36.5 | even                | ok     |

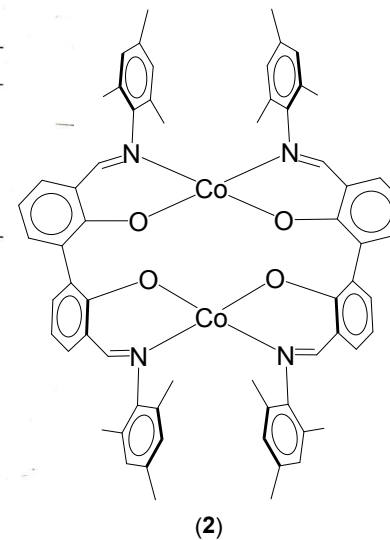

**Fig. S8** High Resolution Mass Spectrometry (HRMS) data of **2**.

## Eager 300 Report

Page: 1    Sample: PG-AE-2-31-1 (PG-AE-2-31-1)

|                                              |                                 |
|----------------------------------------------|---------------------------------|
| Method Name : SRM23092014                    | Company Name : C.E. Instruments |
| Method File : D:\CHNS2012-13\SRM23092014.mth | Printed : 9/23/2014 19:31       |
| Chromatogram : PG-AE-2-31-1                  | Instrument N. : Instrument #1   |
| Operator ID : SONALI                         | Sample weight : .926            |
| Analysed : 09/23/2014 15:14                  |                                 |
| Sample ID : PG-AE-2-31-1 (# 18)              |                                 |
| Analysis Type : UnkNown (Area)               |                                 |

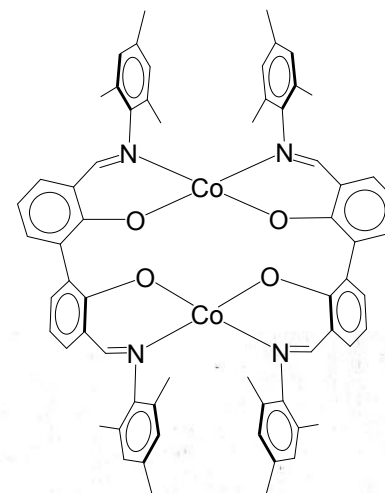

Calib. method : using 'K Factors'

!!! Warning missing one or more peaks.

| Element Name  | %              | Ret.Time | Area           | BC | Area ratio | K factor    |
|---------------|----------------|----------|----------------|----|------------|-------------|
| Nitrogen      | 5.3271         | 43       | 73812          | FU | 24.869010  | .149634E+07 |
| Carbon        | 72.1021        | 66       | 1835641        | FU | 1.000000   | .274934E+07 |
| Hydrogen      | 5.5911         | 181      | 374665         | RS | 4.899418   | .697271E+07 |
| <b>Totals</b> | <b>83.0203</b> |          | <b>2284118</b> |    |            |             |

Fig. S9 Elemental analysis data of 2.

PG-CP-14-49-1-1H

Current Data Parameters  
NAME PG-CP-14-49-1-1H  
EXPNO 15  
PROCNO 1

F2 - Acquisition Parameters  
Date\_ 20170811  
Time 16.39  
INSTRUM spect  
PROBHD 5 mm PABBO BB/  
PULPROG zg30  
TD 65536  
SOLVENT CDCl3  
NS 16  
DS 2  
SWH 10000.000 Hz  
FIDRES 0.152588 Hz  
AQ 3.2767999 sec  
RG 30.72  
DW 50.000 usec  
DE 6.50 usec  
TE 297.4 K  
D1 1.00000000 sec  
TD0 1

==== CHANNEL f1 =====  
SFO1 500.1330885 MHz  
NUC1 1H  
P1 13.50 usec  
PLW1 13.00000000 W

F2 - Processing parameters  
SI 65536  
SF 500.1300000 MHz  
WDW EM  
SSB 0  
LB 0.30 Hz  
GB 0  
PC 1.00

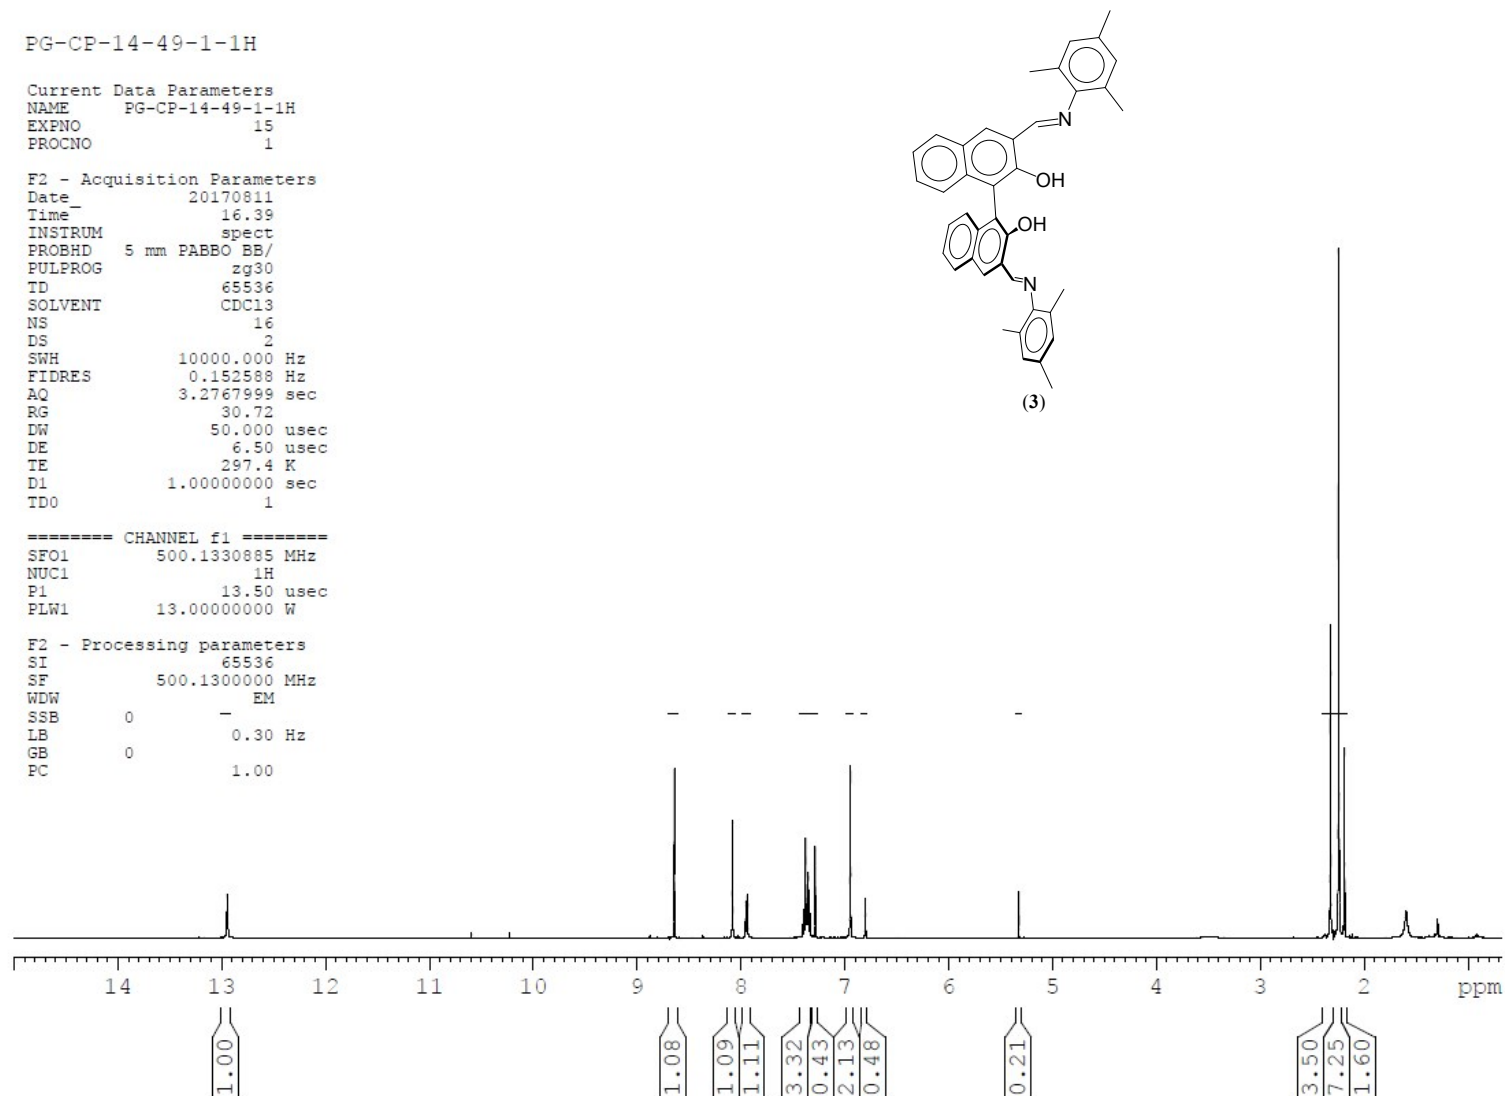

Fig. S10 <sup>1</sup>H NMR spectrum of **3** in CDCl<sub>3</sub>.

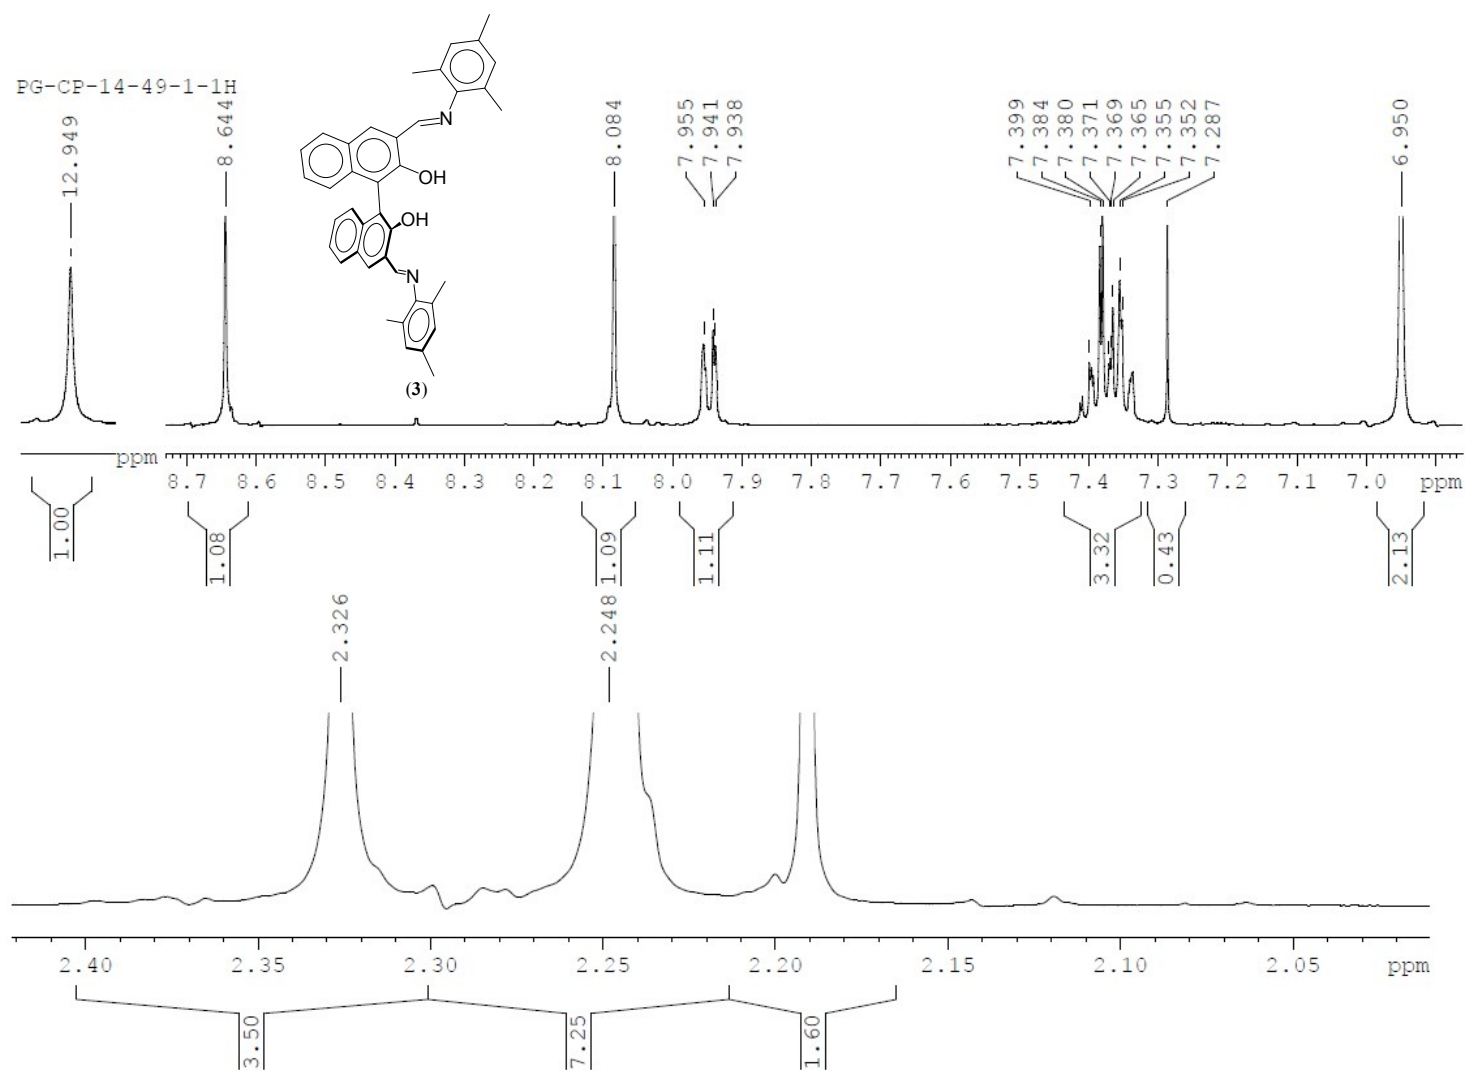

**Fig S11** Expanded  $^1\text{H}$  NMR spectrum of **3** in  $\text{CDCl}_3$ .

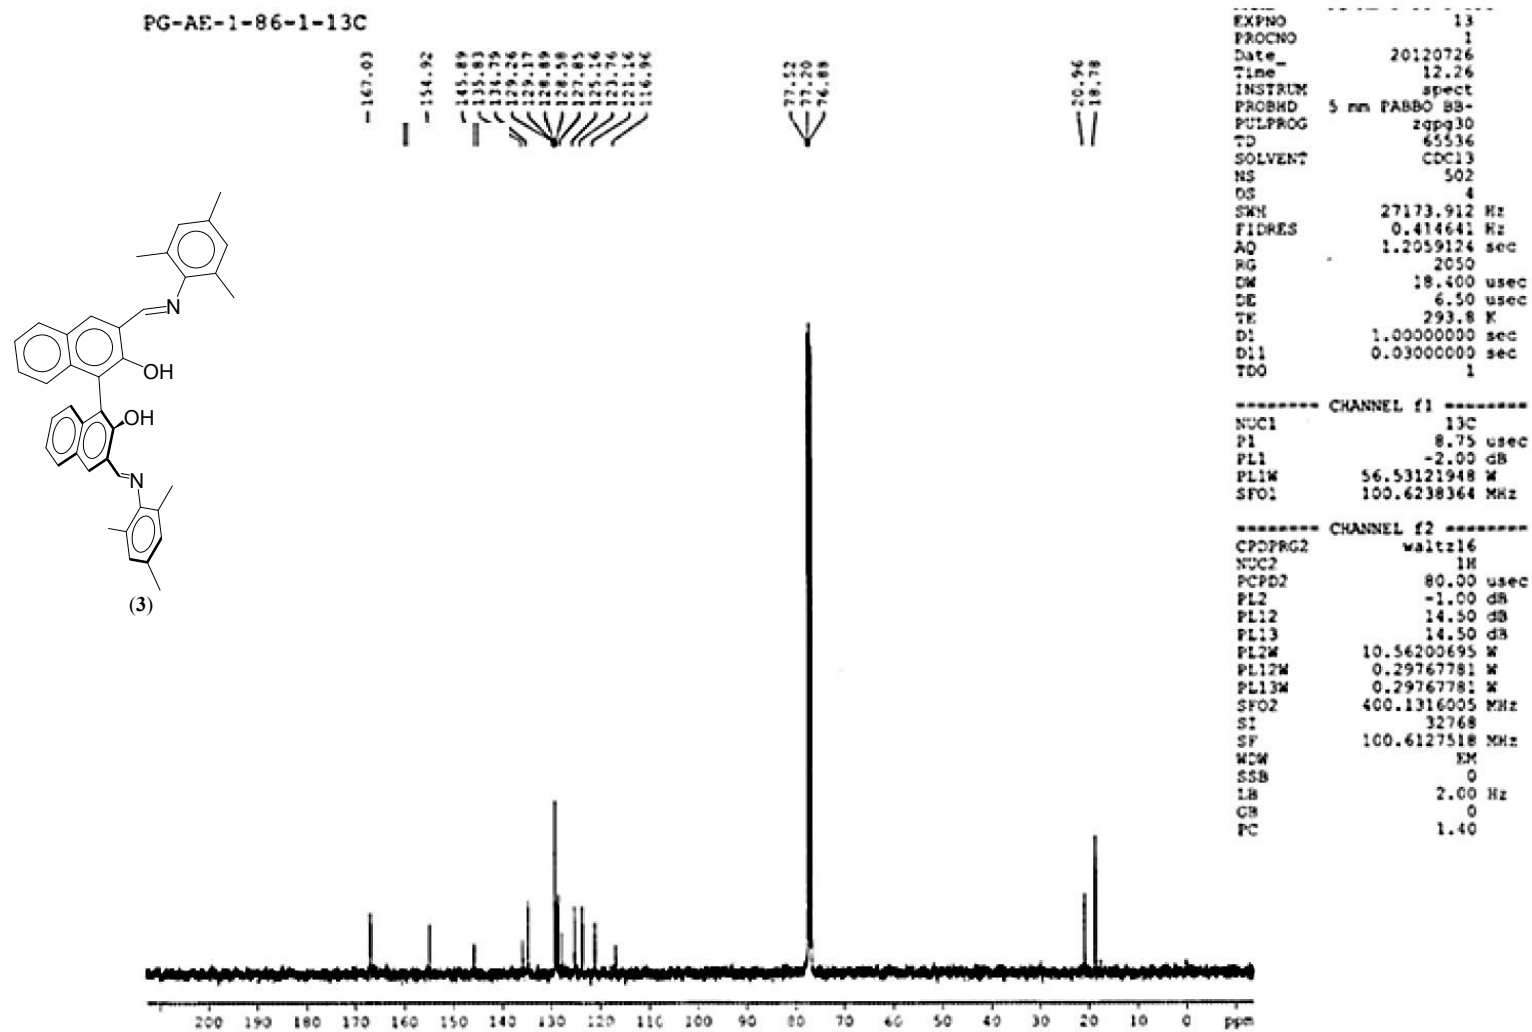

Fig. S12 <sup>13</sup>C{<sup>1</sup>H} NMR spectrum of **3** in CDCl<sub>3</sub>.

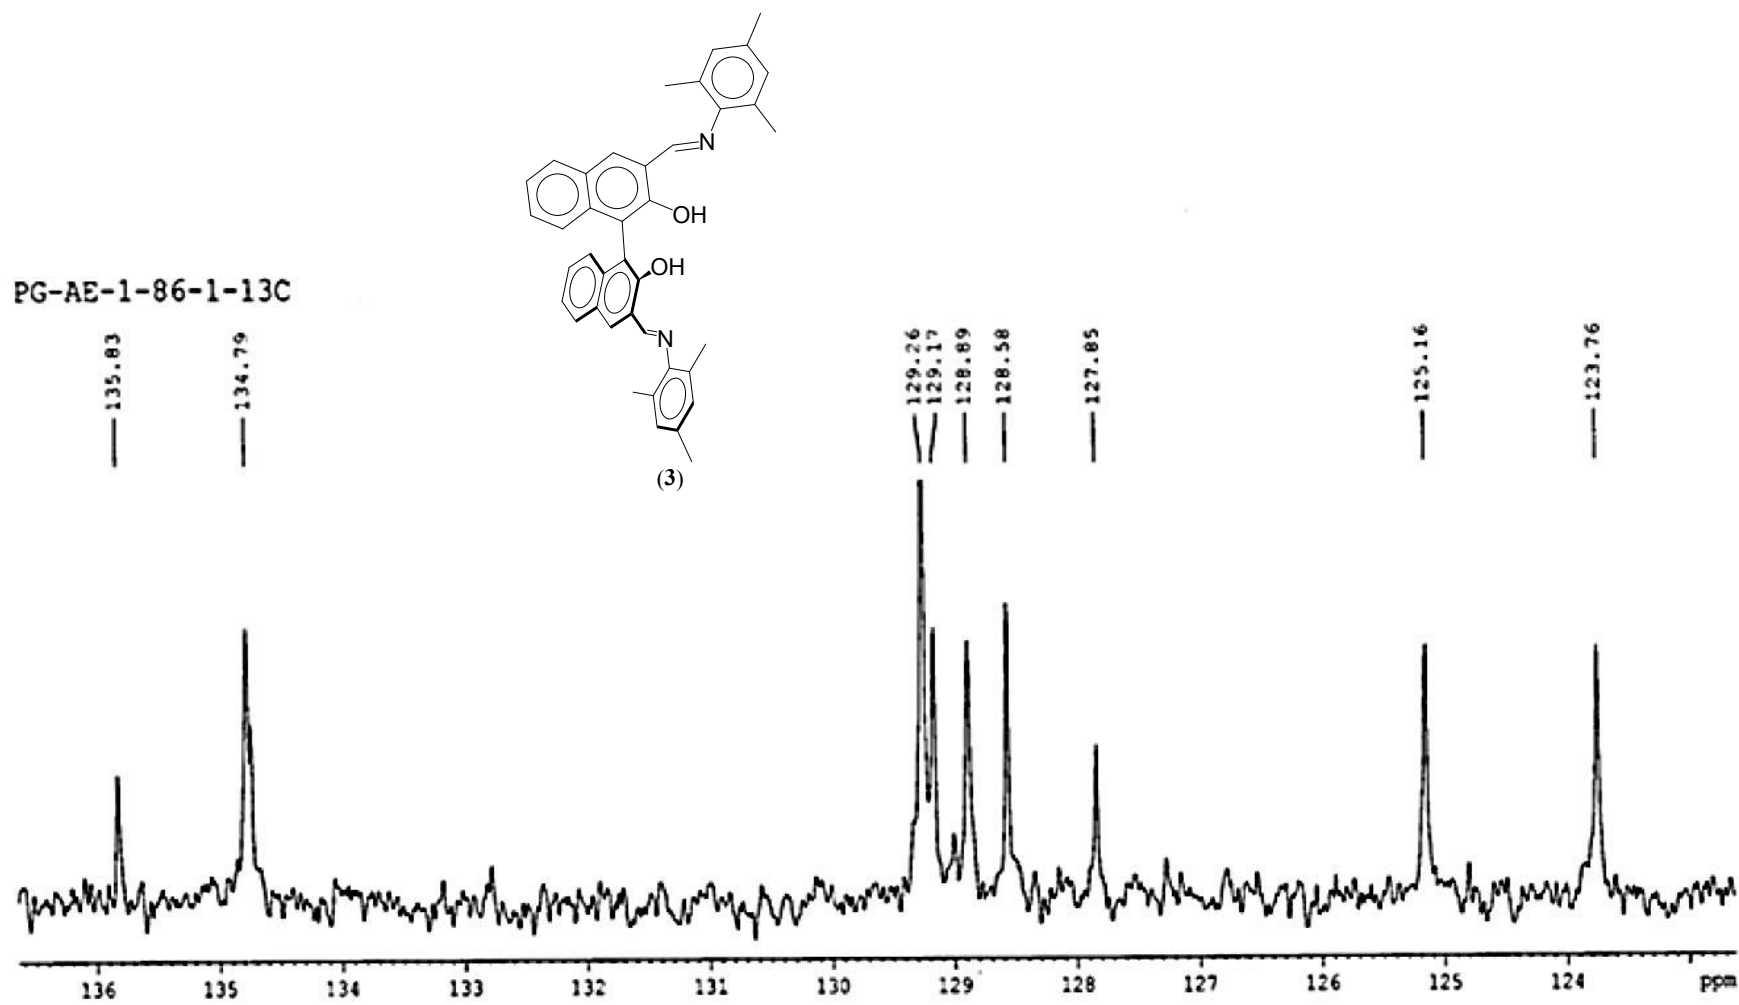

Fig S13 Expanded  $^{13}\text{C}\{^1\text{H}\}$  NMR spectrum of **3** in  $\text{CDCl}_3$ .

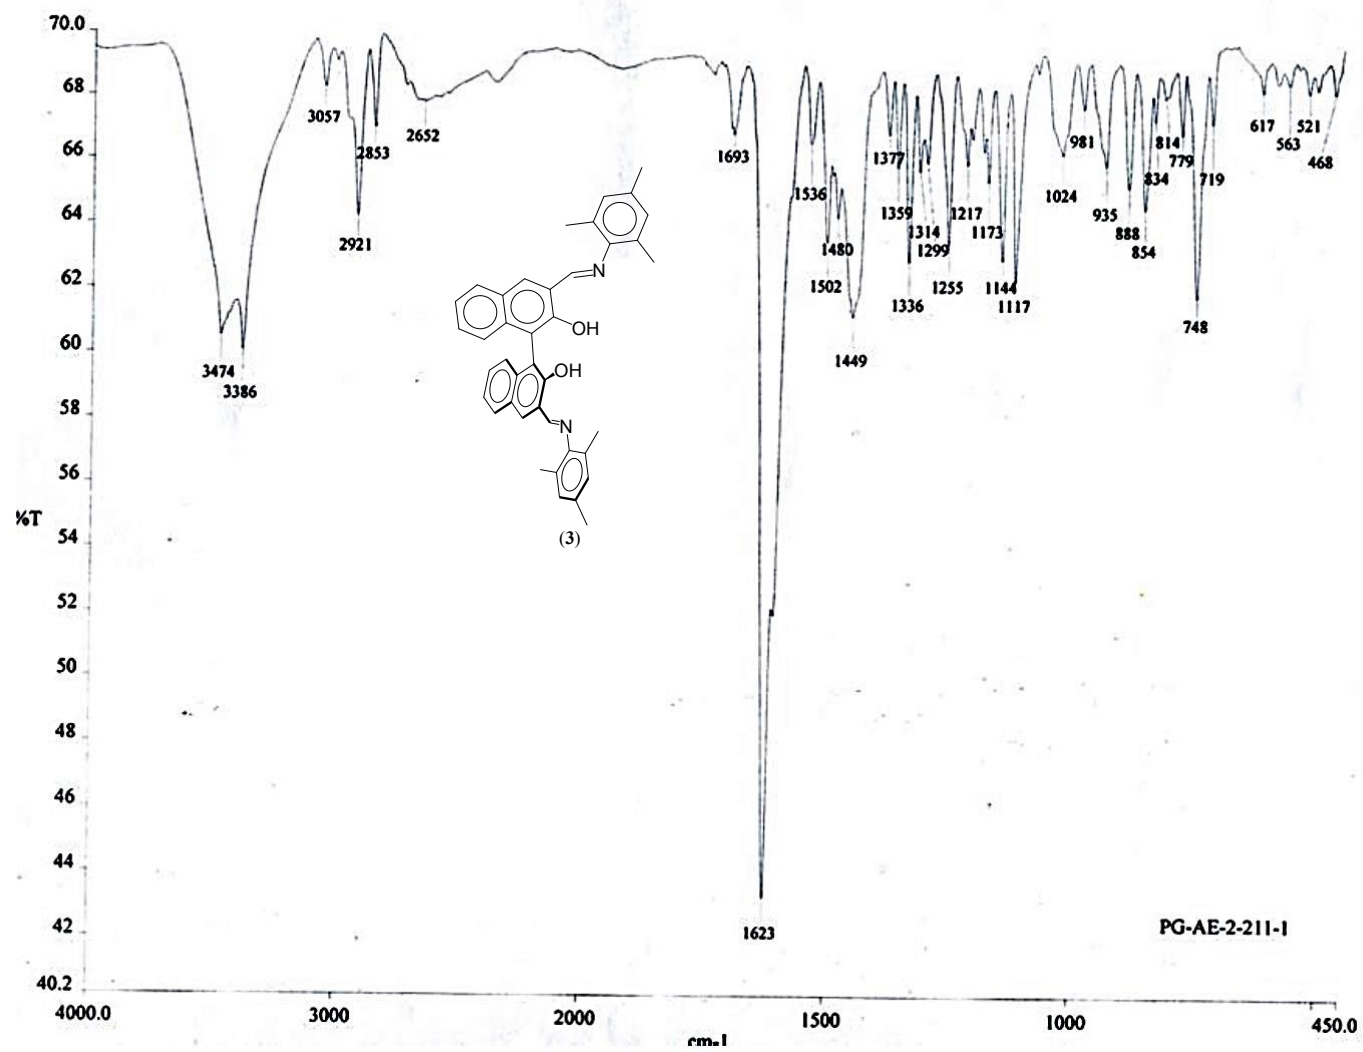

Fig.S14 Infrared spectrum of 3 in KBr.



## Elemental Composition Report

### Single Mass Analysis (displaying only valid results)

Tolerance = 40.0 PPM / DBE: min = -1.5, max = 200.0

Isotope cluster parameters: Separation = 1.0 Abundance = 1.0%

Monoisotopic Mass, Odd and Even Electron Ions

30 formula(e) evaluated with 1 results within limits (up to 50 closest results for each mass)

Micromass : Q-Tof micro (YA-105)

Dept. Of Chemistry I.I.T.(B)

C<sub>40</sub>H<sub>36</sub>N<sub>2</sub>O<sub>2</sub>

PG-AE-1-86-1 42 (0.419) AM (Med,5, Ht,5000.0,311.08,1.00); Sm (Md, 6.00); Sb (5,40.00 ); Cm (4:101)

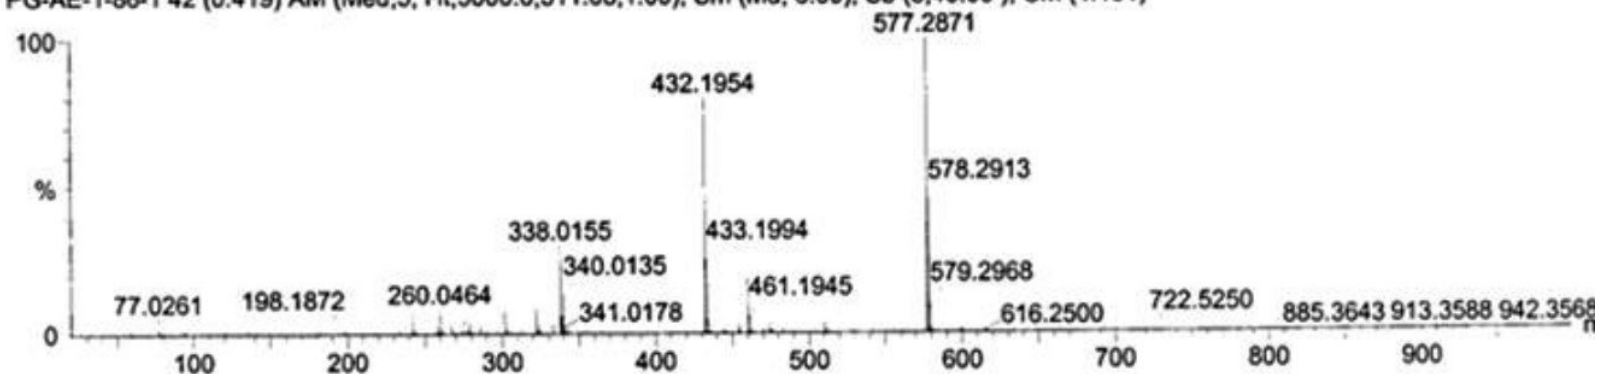

Minimum: -1.5  
Maximum: 200.0 40.0 200.0

| Mass     | Calc. Mass | mDa | PPM | DBE  | Score | Formula                                                       |
|----------|------------|-----|-----|------|-------|---------------------------------------------------------------|
| 577.2871 | 577.2855   | 1.6 | 2.8 | 23.5 | 1     | C <sub>40</sub> H <sub>37</sub> N <sub>2</sub> O <sub>2</sub> |

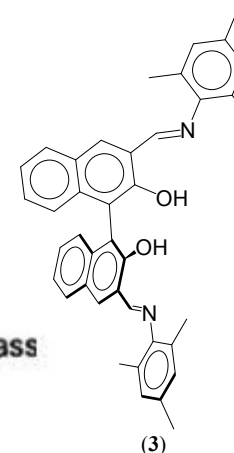

Fig. S15 High Resolution Mass Spectrometry (HRMS) data of 3.

## Eager 300 Report

Page: 1 Sample: PG-AE-1-86-2 (PG-AE-1-86-2)

Method Name : SP-230712  
Method File : D:\CHNS2012\SP-230712.mth  
Chromatogram : PG-AE-1-86-2  
Operator ID : MNRAO  
Analysed : 07/23/2012 15:16  
Sample ID : PG-AE-1-86-2 (# 9)  
Analysis Type : UnkNown (Area)

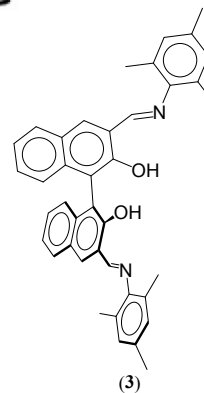

Calib. method : using 'K Factors'

!!! Warning missing one or more peaks.

| Element Name | Ret.Time | Area | BC         | Area ratio | K factor    |
|--------------|----------|------|------------|------------|-------------|
| Nitrogen     | 4.5275   | 43   | 45902 RS   | 32.170660  | 905300.9000 |
| Carbon       | 80.6678  | 67   | 1476682 RS | 1.000000   | .242139E+07 |
| Hydrogen     | 6.6426   | 175  | 290366 RS  | 5.085596   | .578213E+07 |
| Totals       | 91.8379  |      | 1812949    |            |             |

Fig. S16 Elemental analysis data of 3.

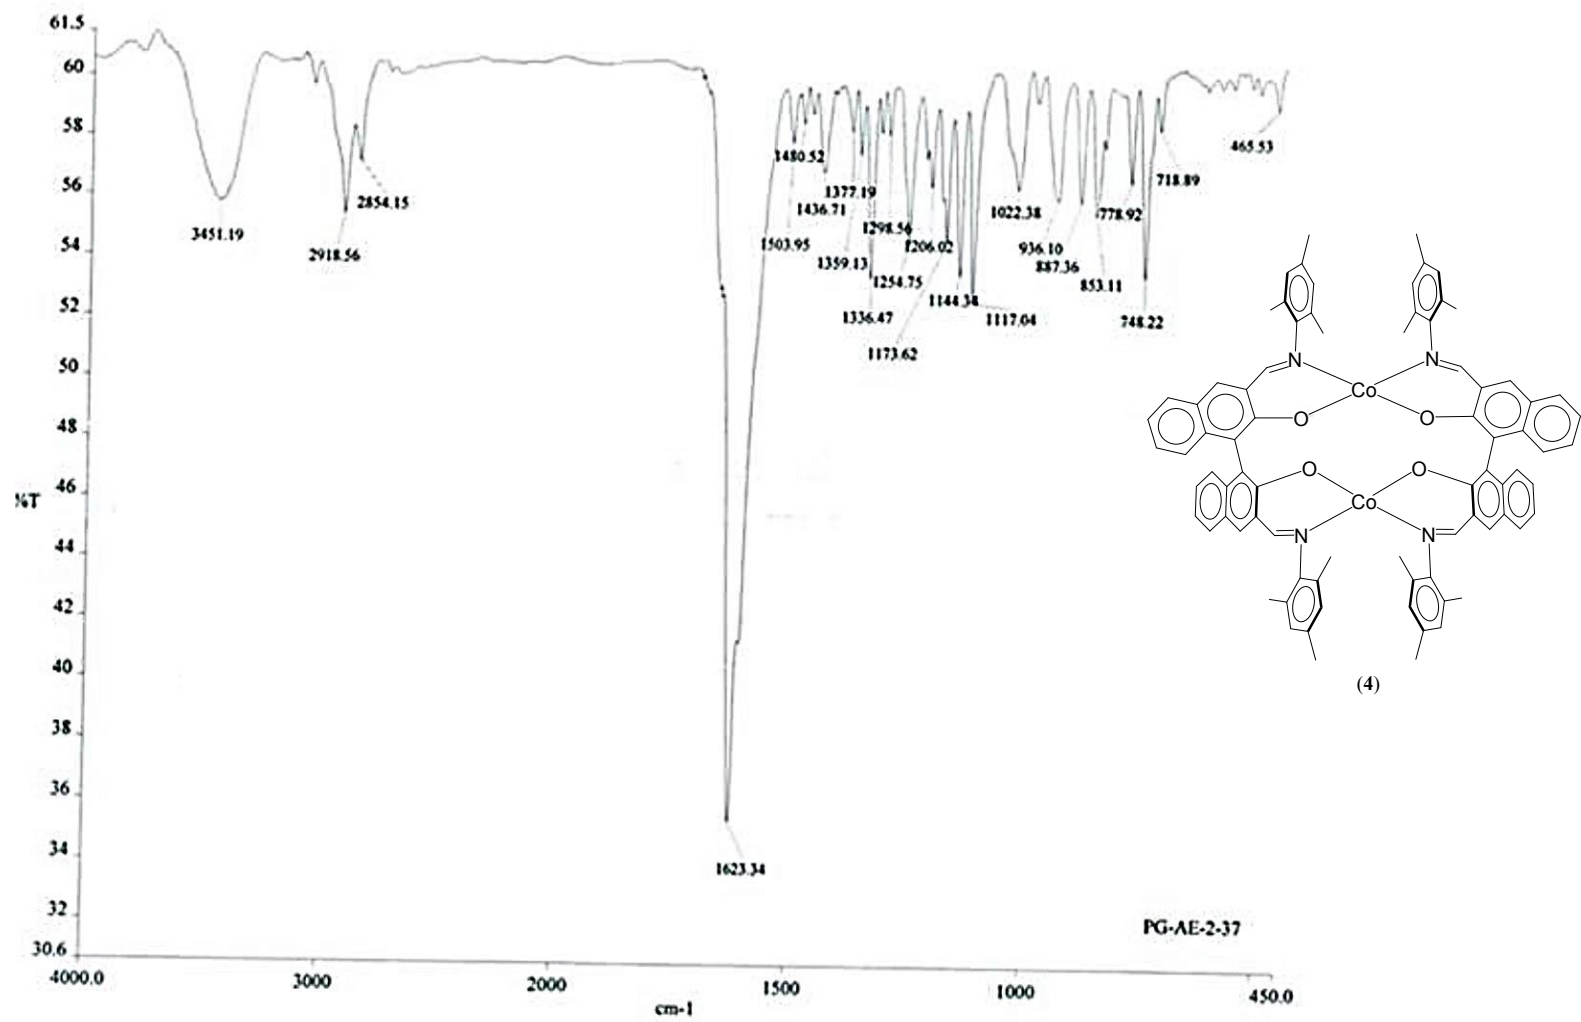

Fig. S17 Infrared spectrum of 4 in KBr.

## Indian Institute of Technology (B)

**Analysis Info**

Analysis Name D:\Data\JAN-13\PG-AE-1-125.d  
 Method Tune\_pos\_Standard\_NAI-1500.m  
 Sample Name PG-AE-1-125  
 Comment C80H68Co2N2O4

Acquisition Date 1/27/2013 12:40:01 PM

Operator IIT-B  
 Instrument maXis impact 282001.00081

**Acquisition Parameter**

|             |          |                       |            |                  |           |
|-------------|----------|-----------------------|------------|------------------|-----------|
| Source Type | ESI      | Ion Polarity          | Positive   | Set Nebulizer    | 2.1 Bar   |
| Focus       | Active   | Set Capillary         | 3500 V     | Set Dry Heater   | 180 °C    |
| Scan Begin  | 50 m/z   | Set End Plate Offset  | -500 V     | Set Dry Gas      | 7.0 l/min |
| Scan End    | 1500 m/z | Set Collision Cell RF | 1800.0 Vpp | Set Divert Valve | Waste     |

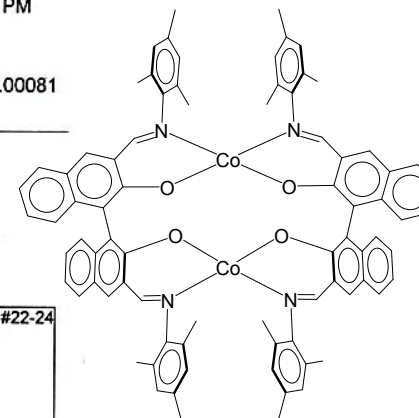

(4)

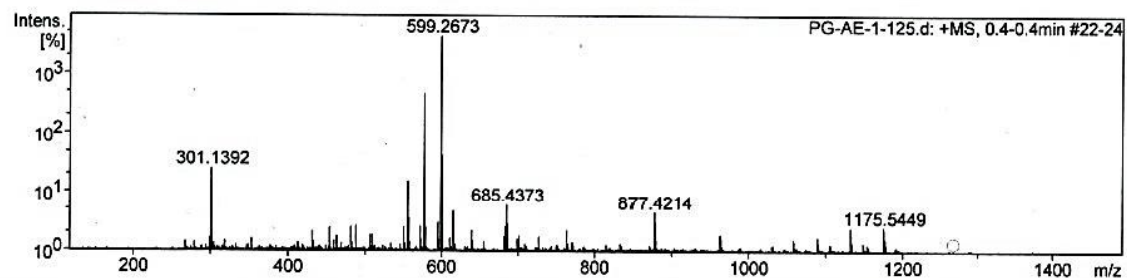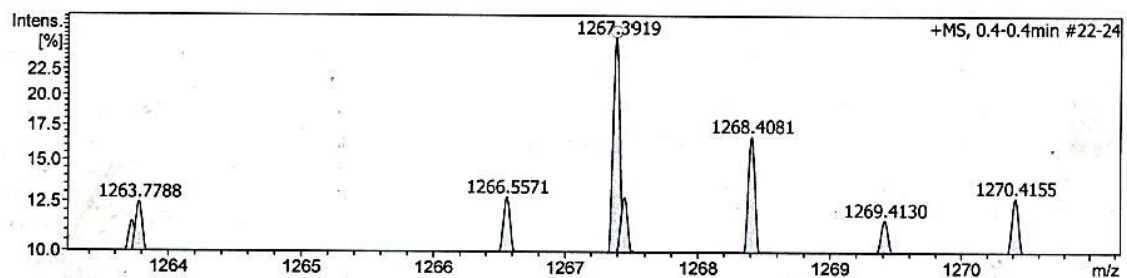

| Meas. m/z | # | Ion Formula   | m/z       | err [ppm] | mSigma | Score | rdb    | e <sup>-</sup> Conf | N-Rule     |
|-----------|---|---------------|-----------|-----------|--------|-------|--------|---------------------|------------|
| 1267.3919 | 1 | C80H69Co2N4O4 | 1267.3977 | 4.6       | 401.1  | 1     | 100.00 | 48.5                | even<br>ok |

**Fig. S18** High Resolution Mass Spectrometry (HRMS) data of **4**.

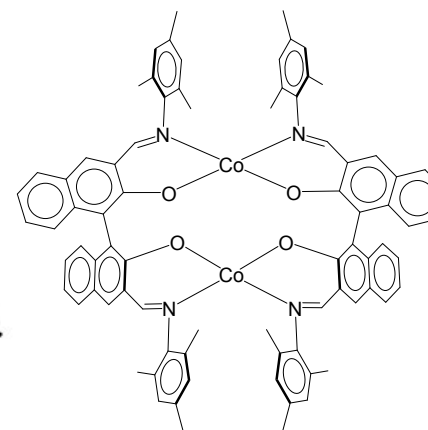

(4)

### Eager 300 Report

Page: 1 Sample: PG-CP-14-60-1 (PG-CP-14-60-1)

Method Name : PGCP28082017  
 Method File : D:\chns2016 -1\PGCP28082017.mth  
 Chromatogram : PG-CP-14-60-1  
 Operator ID : CHANDNI  
 Analysed : 08/28/2017 17:47  
 Sample ID : PG-CP-14-60-1 (# 7)  
 Analysis Type : UnkNown (Area)

Company Name : C.E. Instruments  
 Printed : 8/28/2017 19:13  
 Instrument N. : Instrument #1  
 Sample weight : .856

Calib. method : using 'K Factors'

!!! Warning missing one or more peaks.

| Element Name | %       | Ret.Time | Area    | BC | Area ratio | K factor    |
|--------------|---------|----------|---------|----|------------|-------------|
| Nitrogen     | 4.8811  | 42       | 45575   | RS | 37.650750  | .109078E+07 |
| Carbon       | 76.5413 | 65       | 1715933 | RS | 1.000000   | .261897E+07 |
| Hydrogen     | 5.9255  | 181      | 326290  | RS | 5.258920   | .643284E+07 |
| Totals       | 87.3479 |          | 2087798 |    |            |             |

Fig.S19 Elemental analysis data of 4.

Current Data Parameters  
NAME PG-CP-14-158-1-1H  
EXPNO 1  
PROCNO 1

PG-CP-14-158-1-1H

F2 - Acquisition Parameters  
Date\_ 20171202  
Time 7.41  
INSTRUM spect  
PROBHD 5 mm PABBO BB-  
PULPROG zg30  
TD 54274  
SOLVENT CDCl3  
NS 9  
DS 0  
SWH 8223.685 Hz  
FIDRES 0.151522 Hz  
AQ 3.2998593 sec  
RG 203  
DN 60.800 usec  
DE 6.50 usec  
TE 297.9 K  
D1 1.00000000 sec  
TDO 1

===== CHANNEL f1 =====  
NUC1 1H  
P1 14.75 usec  
PL1 -1.00 dB  
PL1W 10.56200695 W  
SFO1 400.1324710 MHz

F2 - Processing parameters  
SI 32768  
SF 400.1300095 MHz  
WDW EM  
SSB 0  
LB 0.30 Hz  
GB 0  
PC 1.00

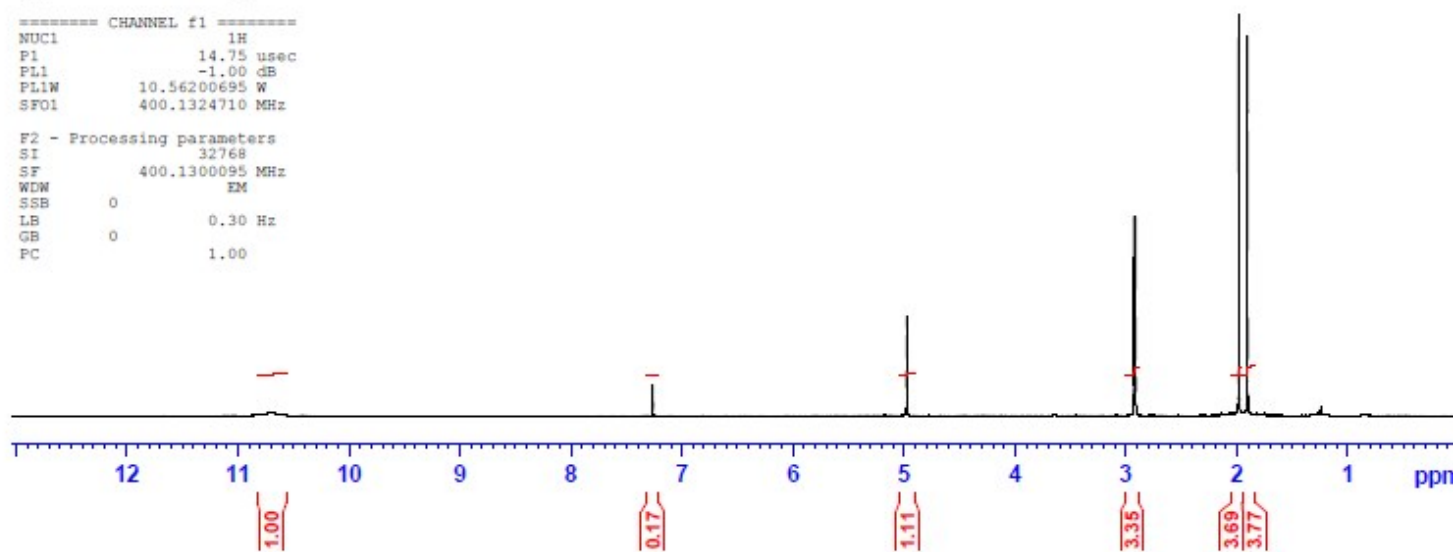

**Fig. S20** <sup>1</sup>H NMR spectrum of **5** in CDCl<sub>3</sub> formed in the reaction of acetyl acetone and methyl amine as catalyzed by the dinuclear [CoL<sup>1</sup>]<sub>2</sub> (**2**) and [CoL<sup>2</sup>]<sub>2</sub> (**4**) complexes.

PG-CP-14-158-1-1H

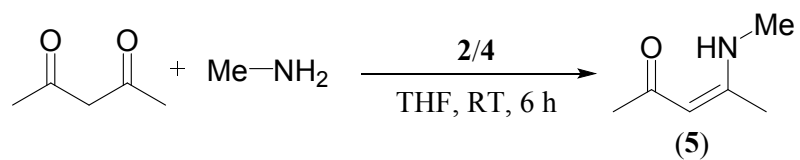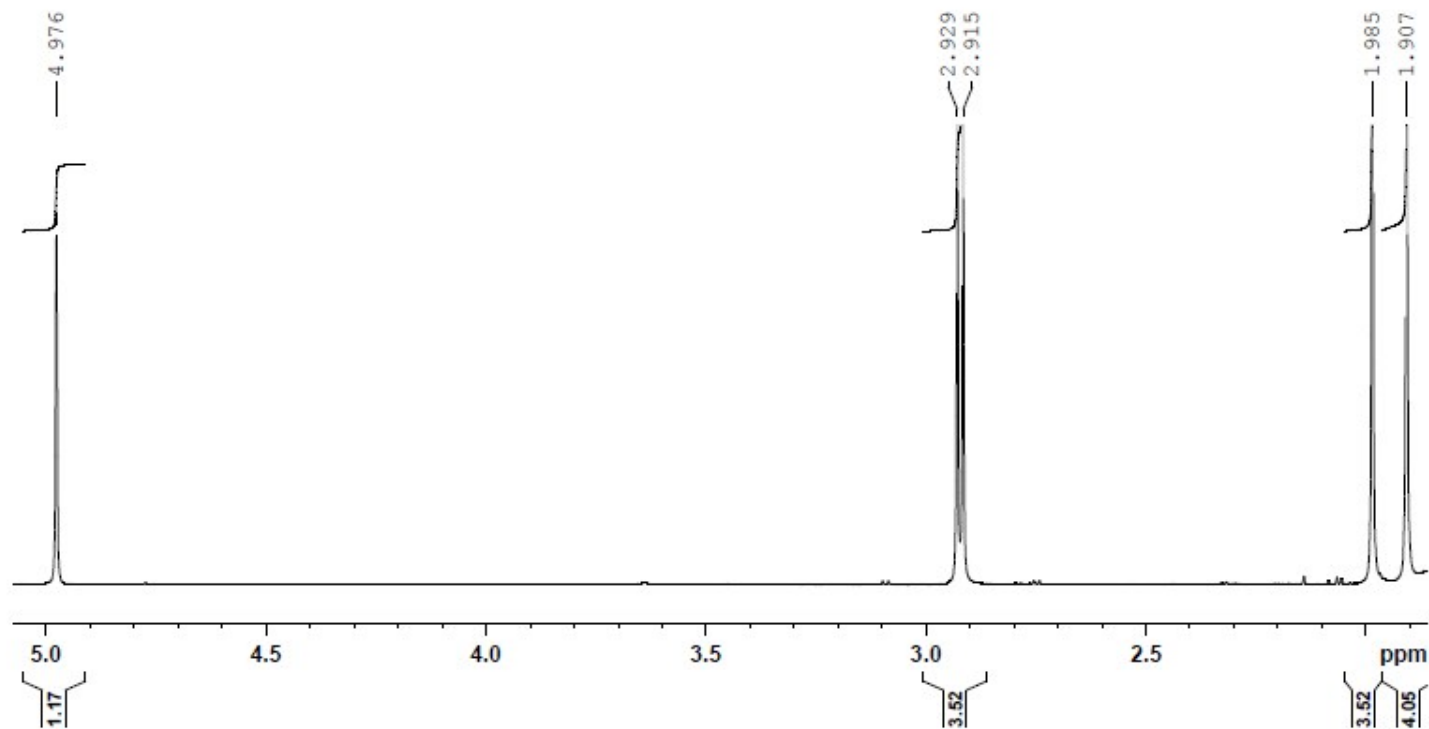

**Fig. S21** Expanded <sup>1</sup>H NMR spectrum of **5** in CDCl<sub>3</sub> formed in the reaction of acetyl acetone and methyl amine as catalyzed by the dinuclear [CoL<sup>1</sup>]<sub>2</sub> (**2**) and [CoL<sup>2</sup>]<sub>2</sub> (**4**) complexes.

PG-CP-14-159-1-13C

Current Data Parameters  
NAME PG-CP-14-159-1-13C  
EXPNO 16  
PROCNO 1

F2 - Acquisition Parameters  
Date\_ 20171207  
Time 17.50  
INSTRUM spect  
PROBHD 5 mm FANNO BH/  
PULPROG zgpg30  
TD 65536  
SOLVENT CDCl3  
NS 92  
DS 4  
SWH 29761.904 Hz  
FIDRES 0.454131 Hz  
AQ 1.1010048 sec  
RG 197.27  
DW 16.800 usec  
DE 6.50 usec  
TE 298.7 K  
D1 2.0000000 sec  
D11 0.0300000 sec  
TD0 1

----- CHANNEL F1 -----  
SFO1 125.7703637 MHz  
NUC1 13C  
P1 8.90 usec  
P1M1 103.0000000 W

----- CHANNEL F2 -----  
SFO2 500.1320005 MHz  
NUC2 1H  
CPOPRG12 waltz16  
PCPD2 80.00 usec  
P1M2 16.00000000 W  
P1M12 0.44556001 W  
P1M13 0.22411001 W

F2 - Processing parameters  
SI 32768  
SF 125.7577592 MHz  
WDW EM  
SSB 0  
LB 1.00 Hz  
GB 0  
PC 1.40

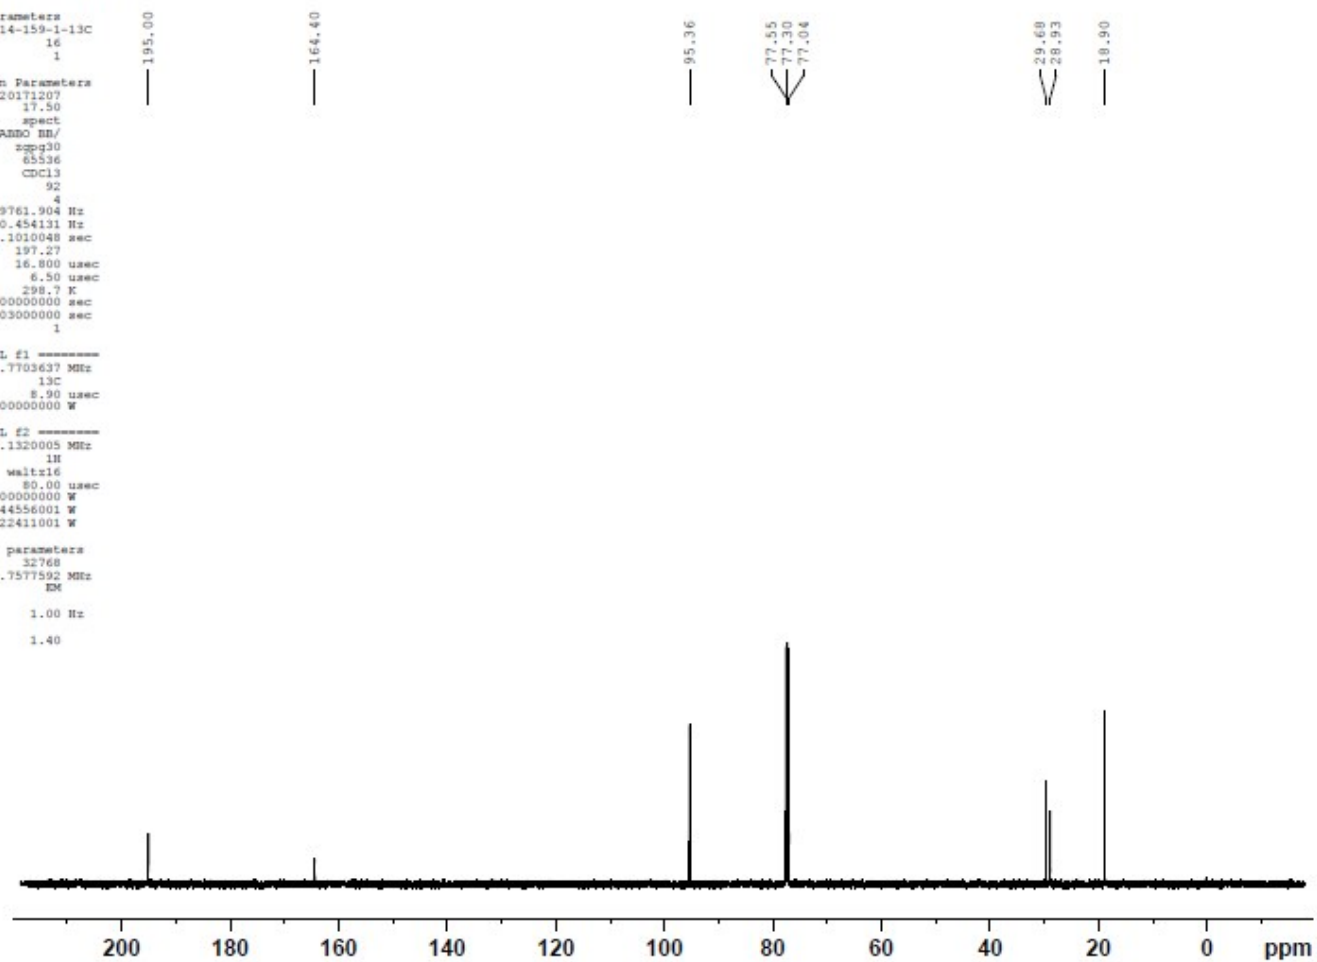

**Fig. S22**  $^{13}\text{C}\{^1\text{H}\}$  NMR spectrum of **5** in  $\text{CDCl}_3$  formed in the reaction of acetyl acetone and methyl amine as catalyzed by the dinuclear  $[\text{CoL}^1]_2$  (**2**) and  $[\text{CoL}^2]_2$  (**4**) complexes.



File : F:\GCMSDATA2017\November2017\PG-CP-14-159-2.D  
Operator : CP  
Acquired : 30 Nov 2017 20:09 using AcqMethod COMMON METHOD-2017.M  
Instrument : GCMS  
Sample Name: PG-CP-14-159-2  
Misc Info :  
Vial Number: 1

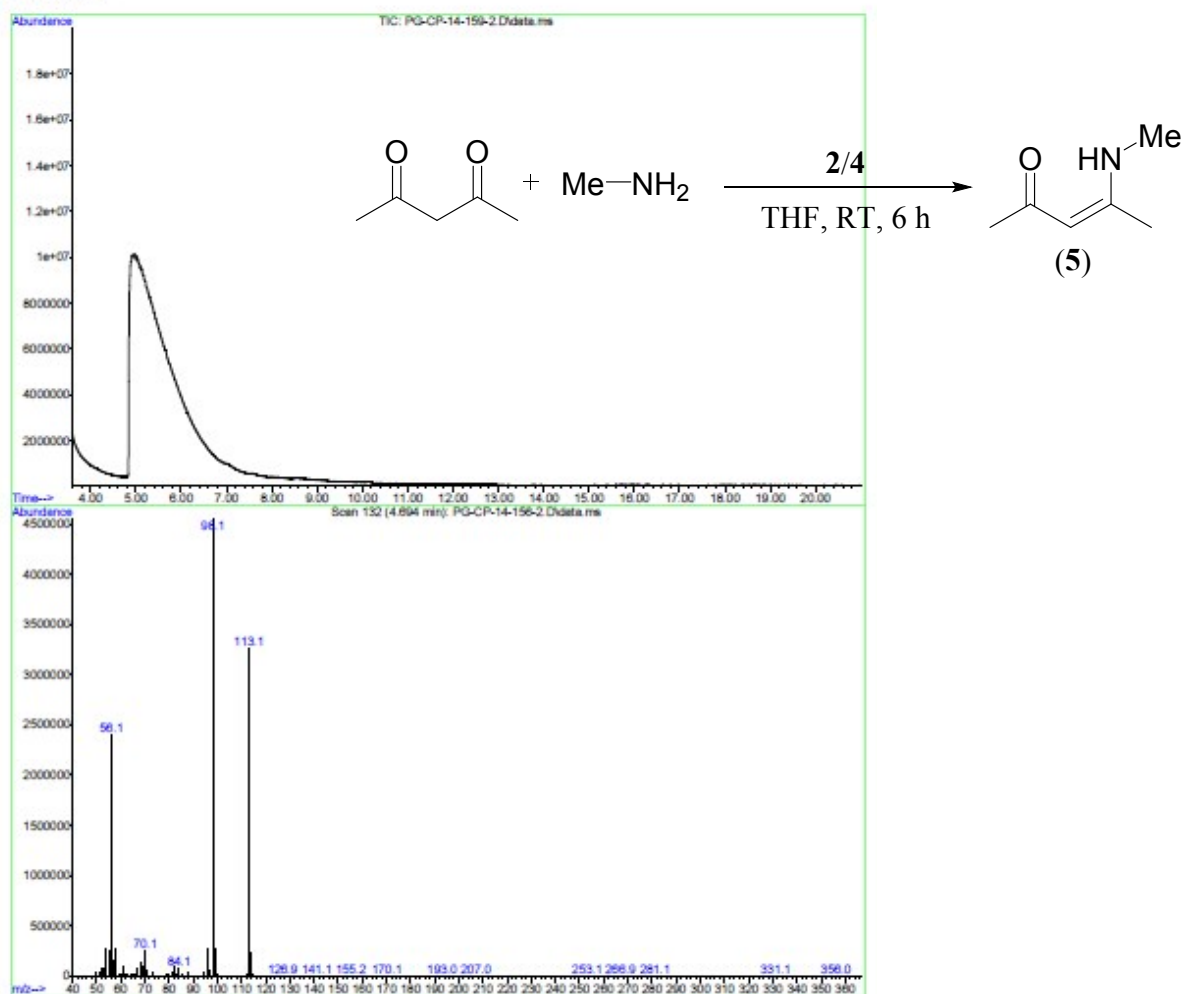

**Fig. S23** GCMS trace of 5 ( $m/z$  113) in EtOAc formed in the reaction of acetyl acetone and methyl amine as catalyzed by the the dinuclear [CoL<sup>1</sup>]<sub>2</sub> (2) and [CoL<sup>2</sup>]<sub>2</sub> (4) complexes.

## Eager 300 Report

Page: 1 Sample: PG-CP-14-197-1 (PG-CP-14-197-1)

Method Name : PGCP30122017  
 Method File : D:\CHNS-2017\PGCP30122017.mth  
 Chromatogram : PG-CP-14-197-1  
 Operator ID : CHANDNI  
 Analysed : 12/30/2017 17:34  
 Sample ID : PG-CP-14-197-1 (# 6)  
 Analysis Type : UnkNown (Area)

Company Name : C.E. Instruments  
 Printed : 12/31/2017 22:02  
 Instrument N. : Instrument #1  
 Sample weight : 1.271

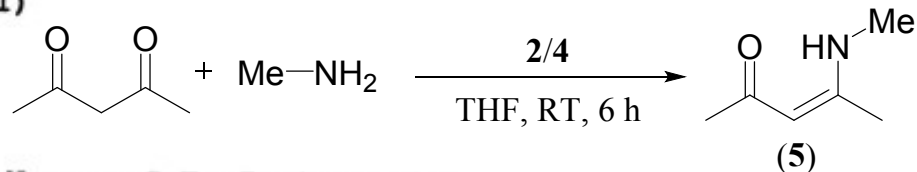

Calib. method : using 'K Factors'

!!! Warning missing one or more peaks.

| Element Name | %       | Ret.Time | Area    | BC | Area ratio | K factor    |
|--------------|---------|----------|---------|----|------------|-------------|
| 1            | 0.0000  | 2        | 139533  | RS |            | 0.0000      |
| Nitrogen     | 12.3527 | 41       | 170136  | RS | 12.354090  | .108364E+07 |
| Carbon       | 63.6455 | 63       | 2101869 | RS | 1.000000   | .259525E+07 |
| Hydrogen     | 9.1709  | 190      | 775439  | RS | 2.710554   | .665260E+07 |
| Totals       | 85.1691 |          | 3186977 |    |            |             |

**Fig.S24** Elemental analysis data of **5** formed in the reaction of acetyl acetone and methyl amine as catalyzed by the dinuclear  $[\text{CoL}^1]_2$  (**2**) and  $[\text{CoL}^2]_2$  (**4**) complexes.

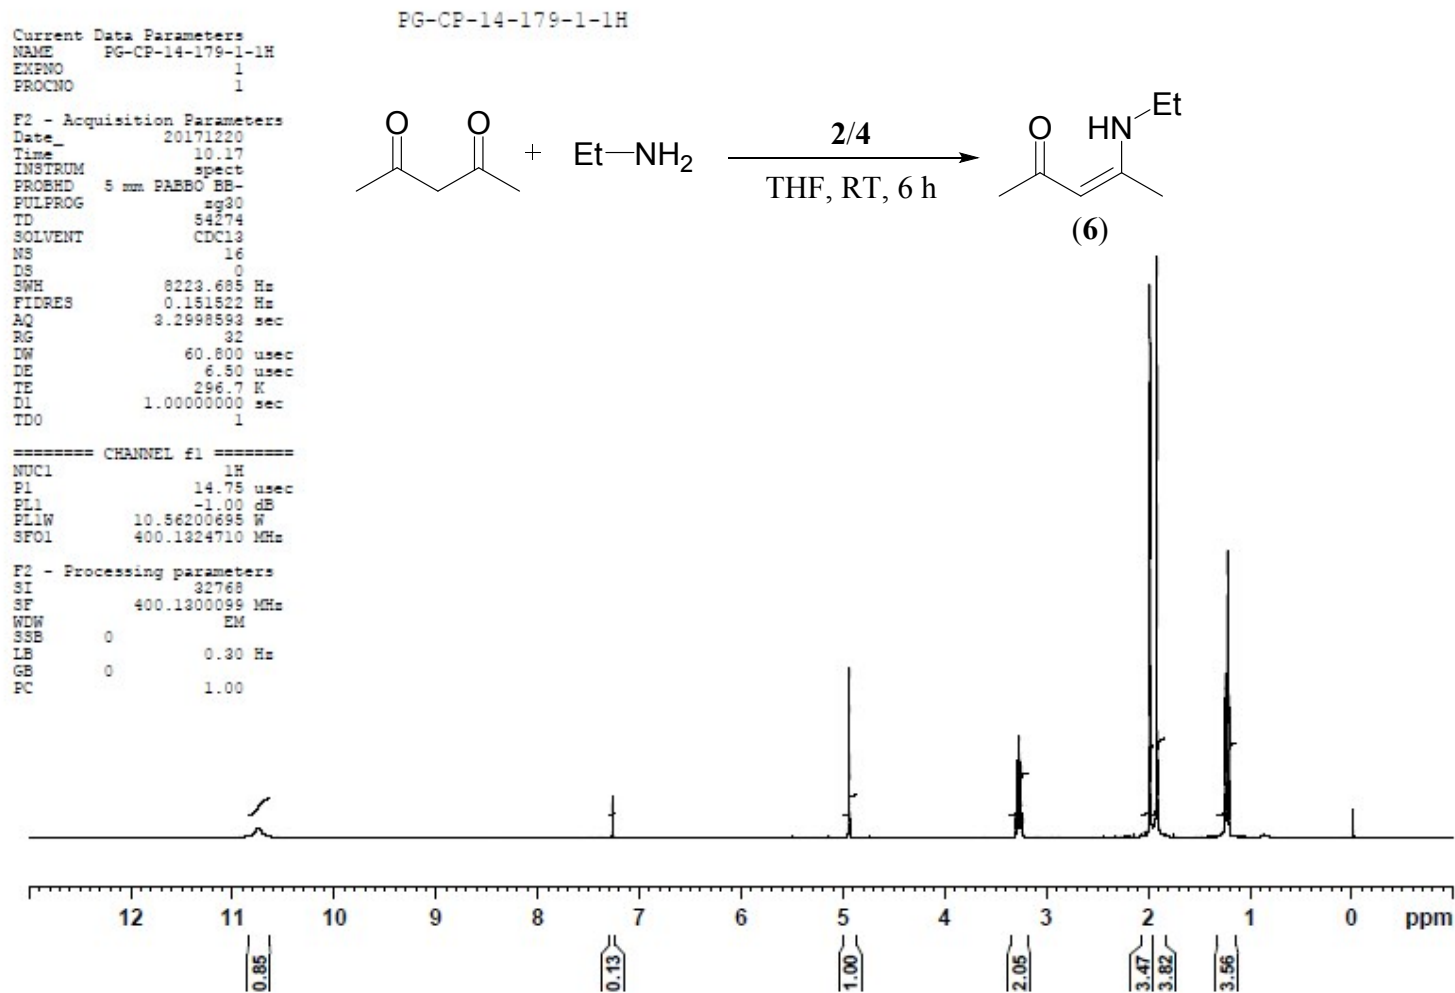

**Fig. S25**  $^1\text{H}$  NMR spectrum of **6** in  $\text{CDCl}_3$  formed in the reaction of acetyl acetone and ethyl amine as catalyzed by the dinuclear  $[\text{CoL}^1]_2$  (**2**) and  $[\text{CoL}^2]_2$  (**4**) complexes.

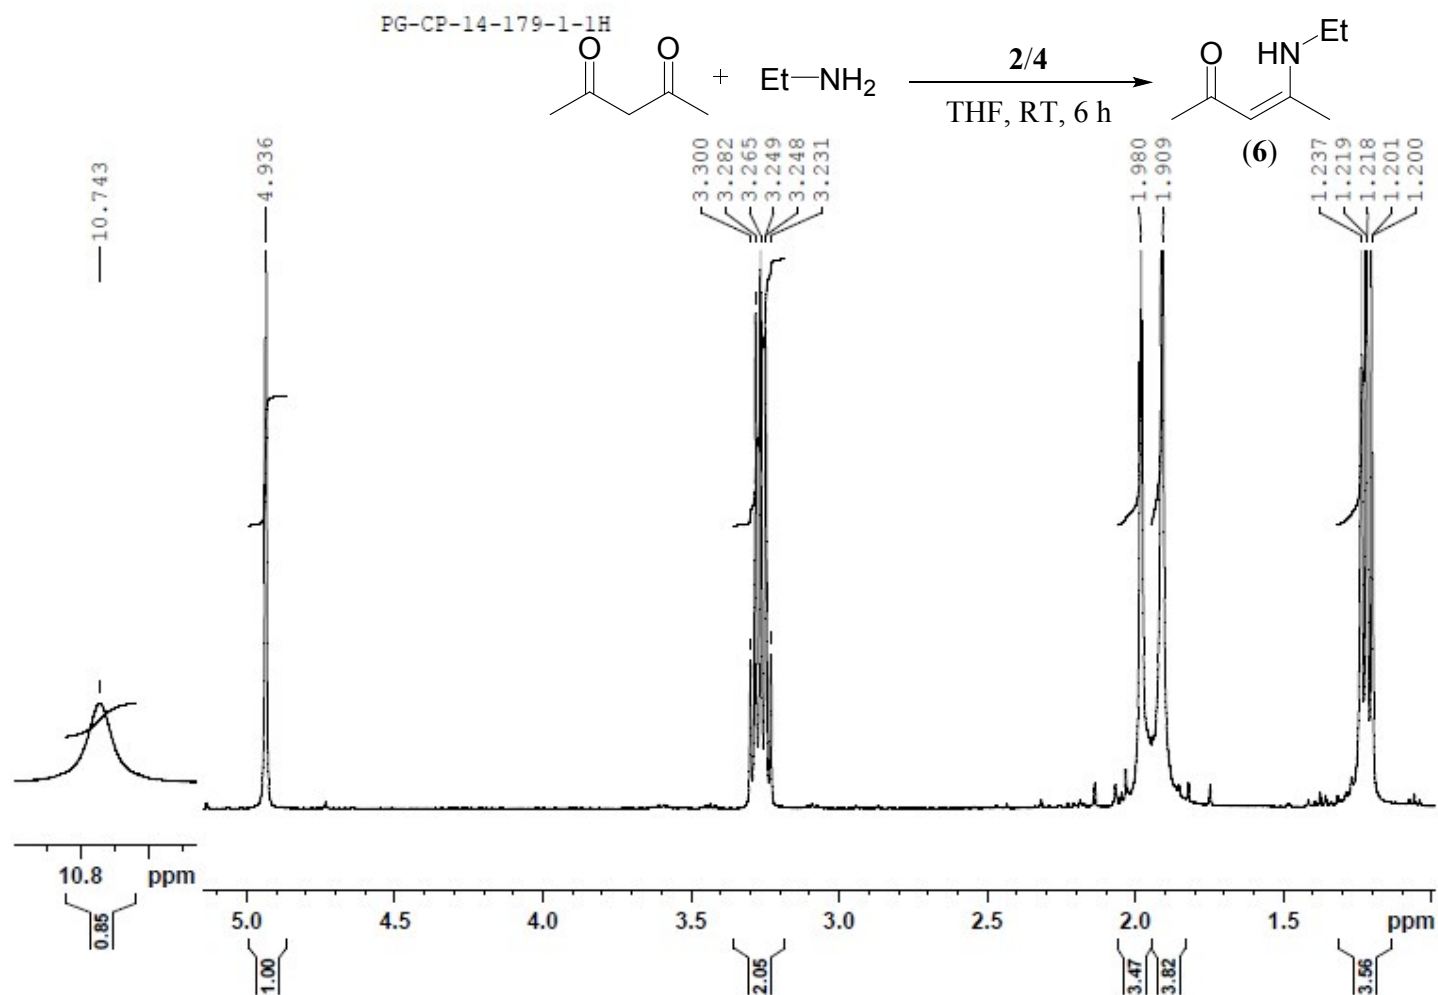

**Fig. S26** Expanded <sup>1</sup>H NMR spectrum of **6** in CDCl<sub>3</sub> formed in the reaction of acetyl acetone and ethyl amine as catalyzed by the dinuclear [CoL<sup>1</sup>]<sub>2</sub> (**2**) and [CoL<sup>2</sup>]<sub>2</sub> (**4**) complexes.

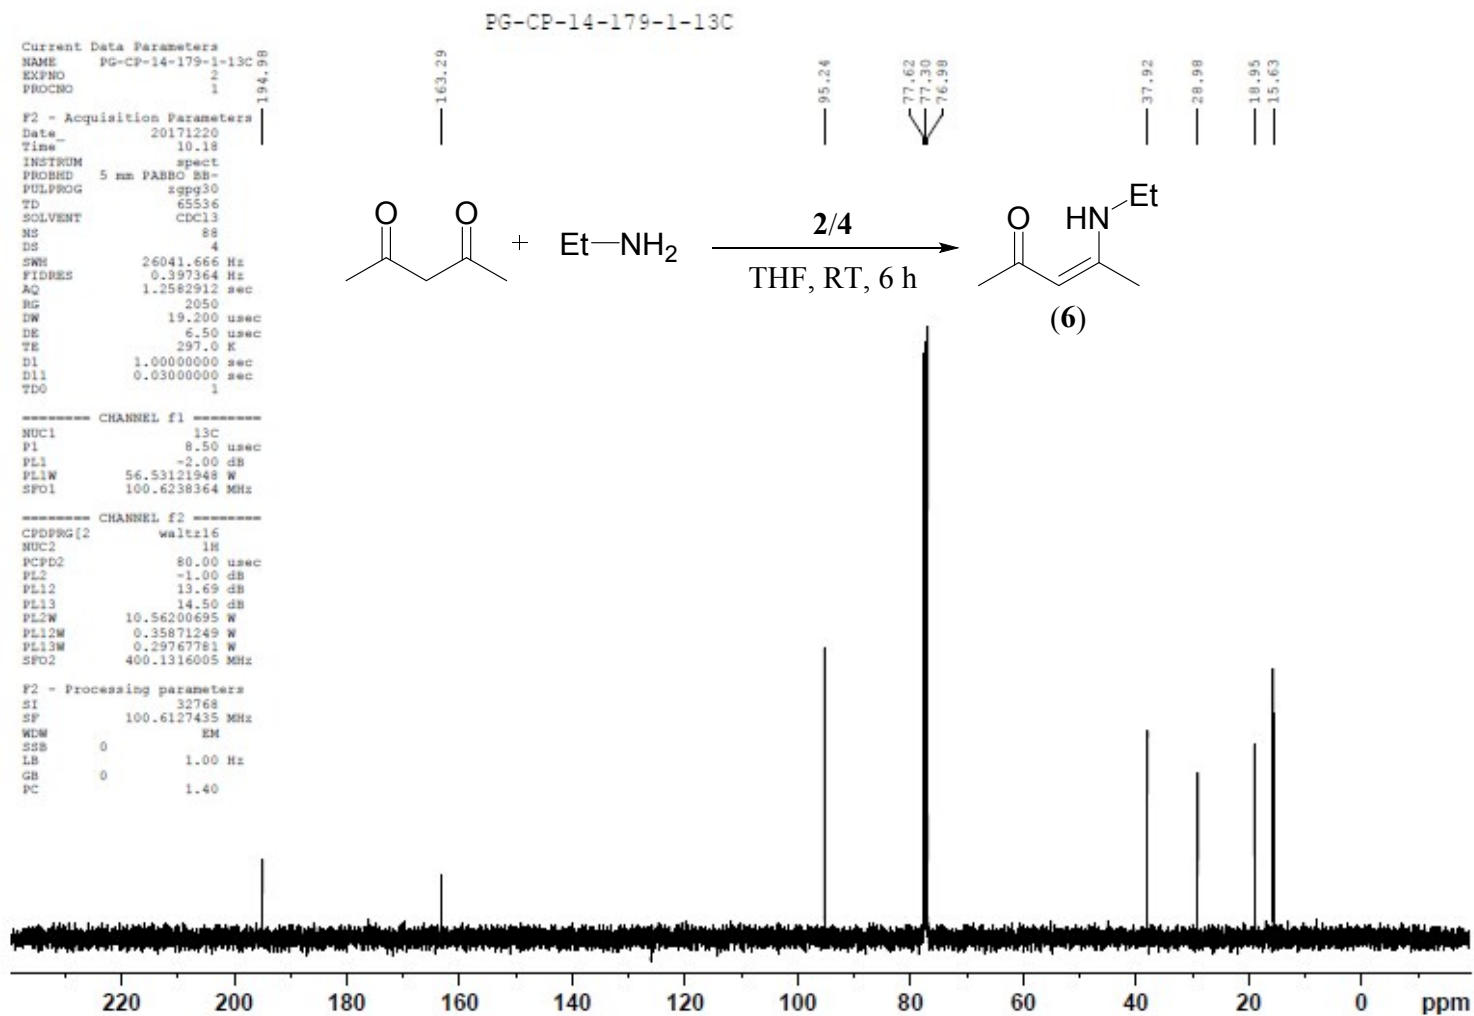

**Fig. S27**  $^{13}\text{C}\{^1\text{H}\}$  NMR spectrum of **6** in  $\text{CDCl}_3$  formed in the reaction of acetyl acetone and ethyl amine as catalyzed by the dinuclear  $[\text{CoL}^1]_2$  (**2**) and  $[\text{CoL}^2]_2$  (**4**) complexes.

File : F:\GCMSDATA2017\DECEMBER-2017\PG-CP-14-179-1.D  
Operator : CP  
Acquired : 18 Dec 2017 15:29 using AcqMethod COMMON METHOD-2017.M  
Instrument : GCMS  
Sample Name : PG-CP-14-179-1  
Misc Info :  
Vial Number: 1

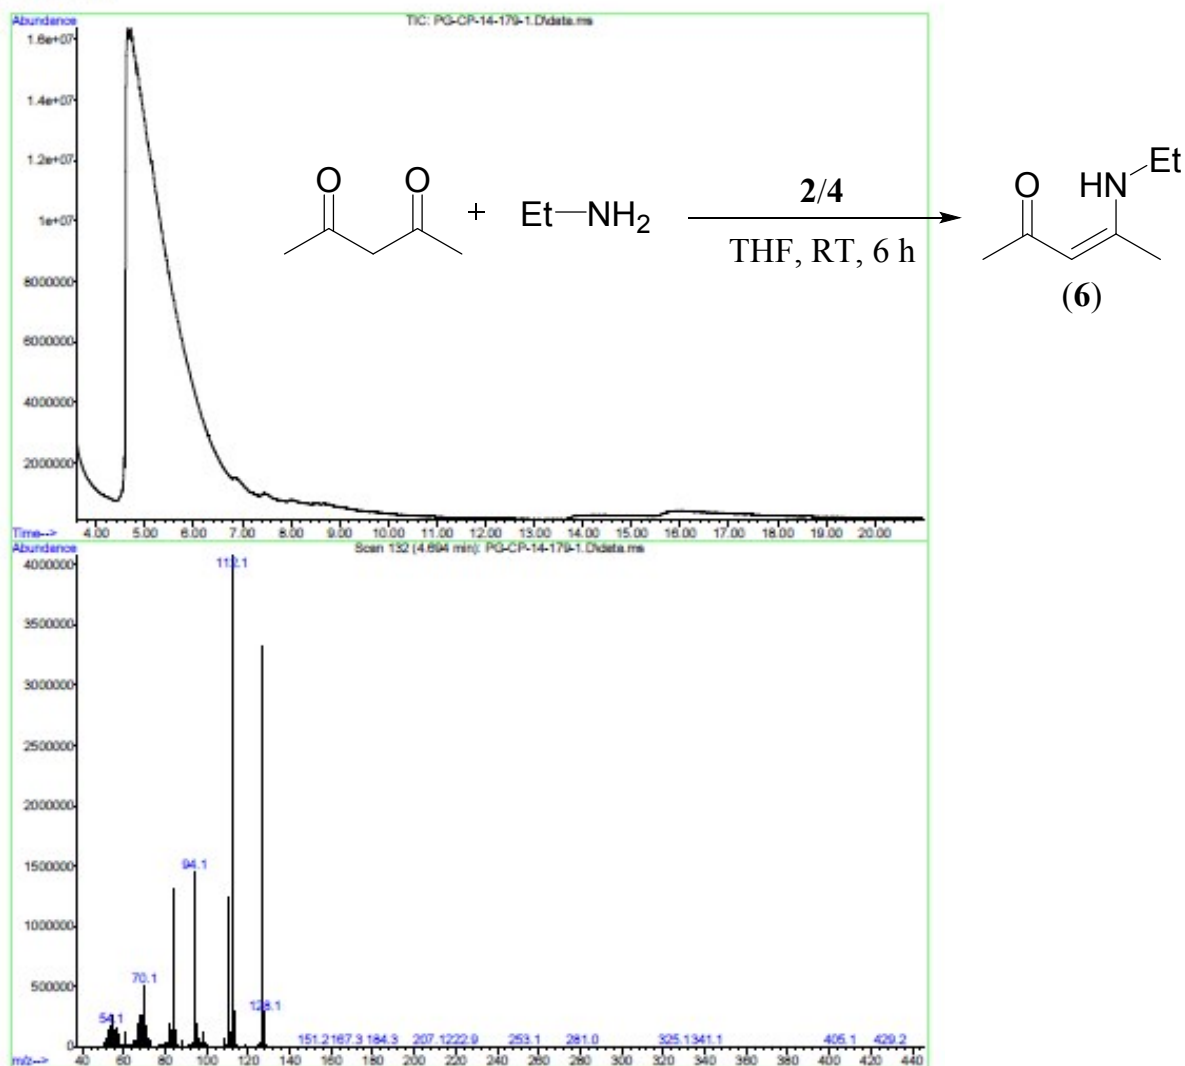

**Fig. S28** GCMS trace of **6** ( $m/z$  127) in EtOAc formed in the reaction of acetyl acetone and ethyl amine as catalyzed by the the dinuclear [CoL<sup>1</sup>]<sub>2</sub> (**2**) and [CoL<sup>2</sup>]<sub>2</sub> (**4**) complexes.

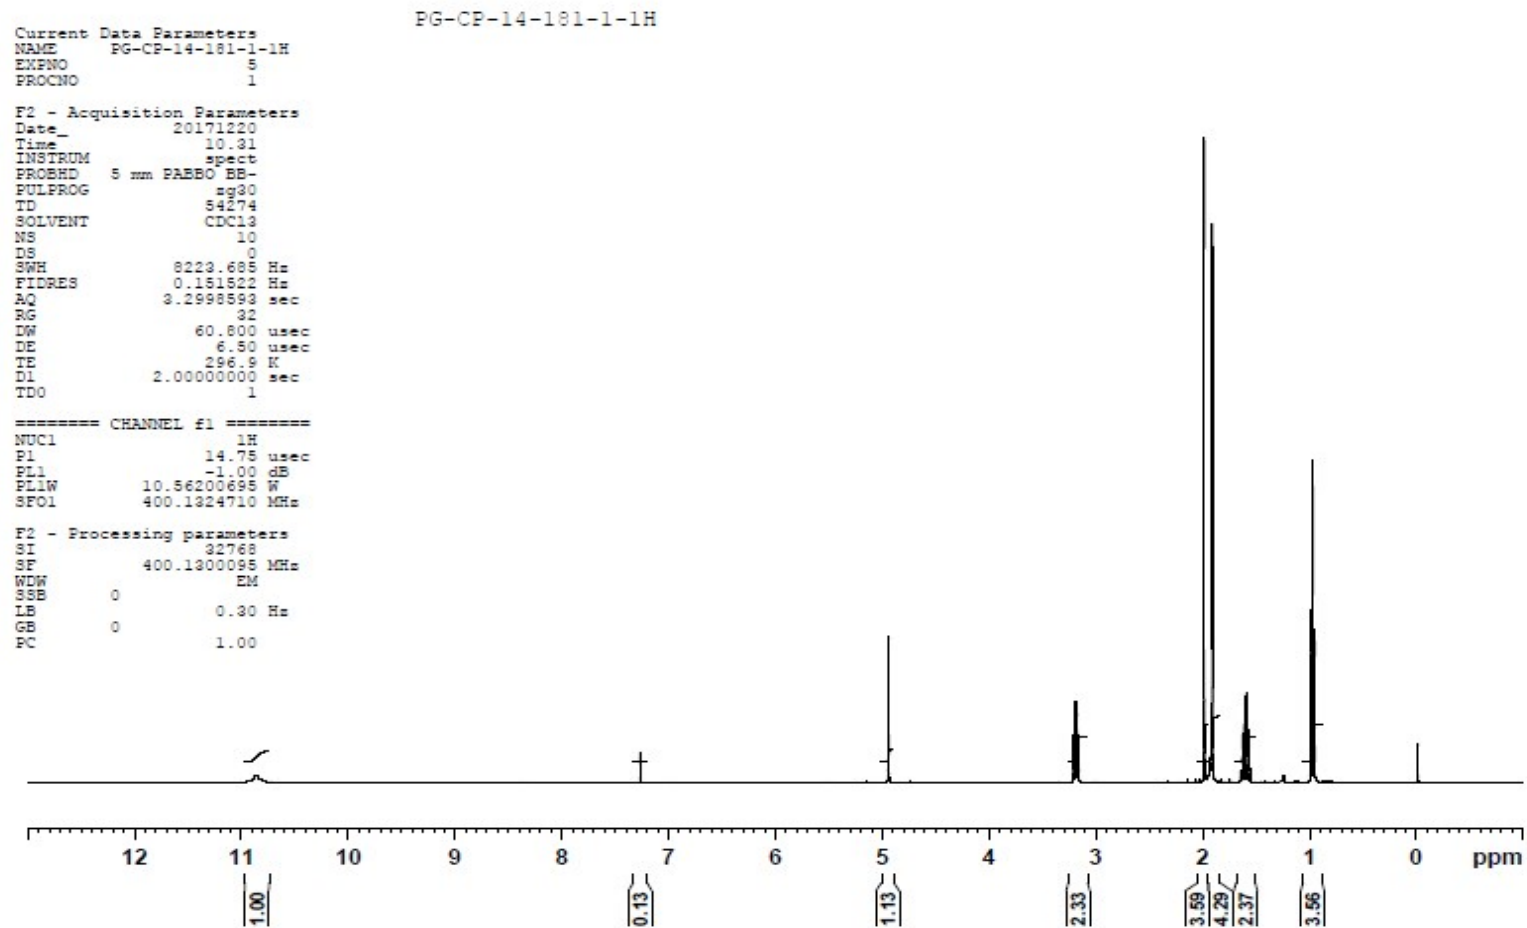

**Fig. S29**  $^1\text{H}$  NMR spectrum of **7** in  $\text{CDCl}_3$  formed in the reaction of acetyl acetone and *n*-propyl amine as catalyzed by the dinuclear  $[\text{CoL}^1]_2$  (**2**) and  $[\text{CoL}^2]_2$  (**4**) complexes.

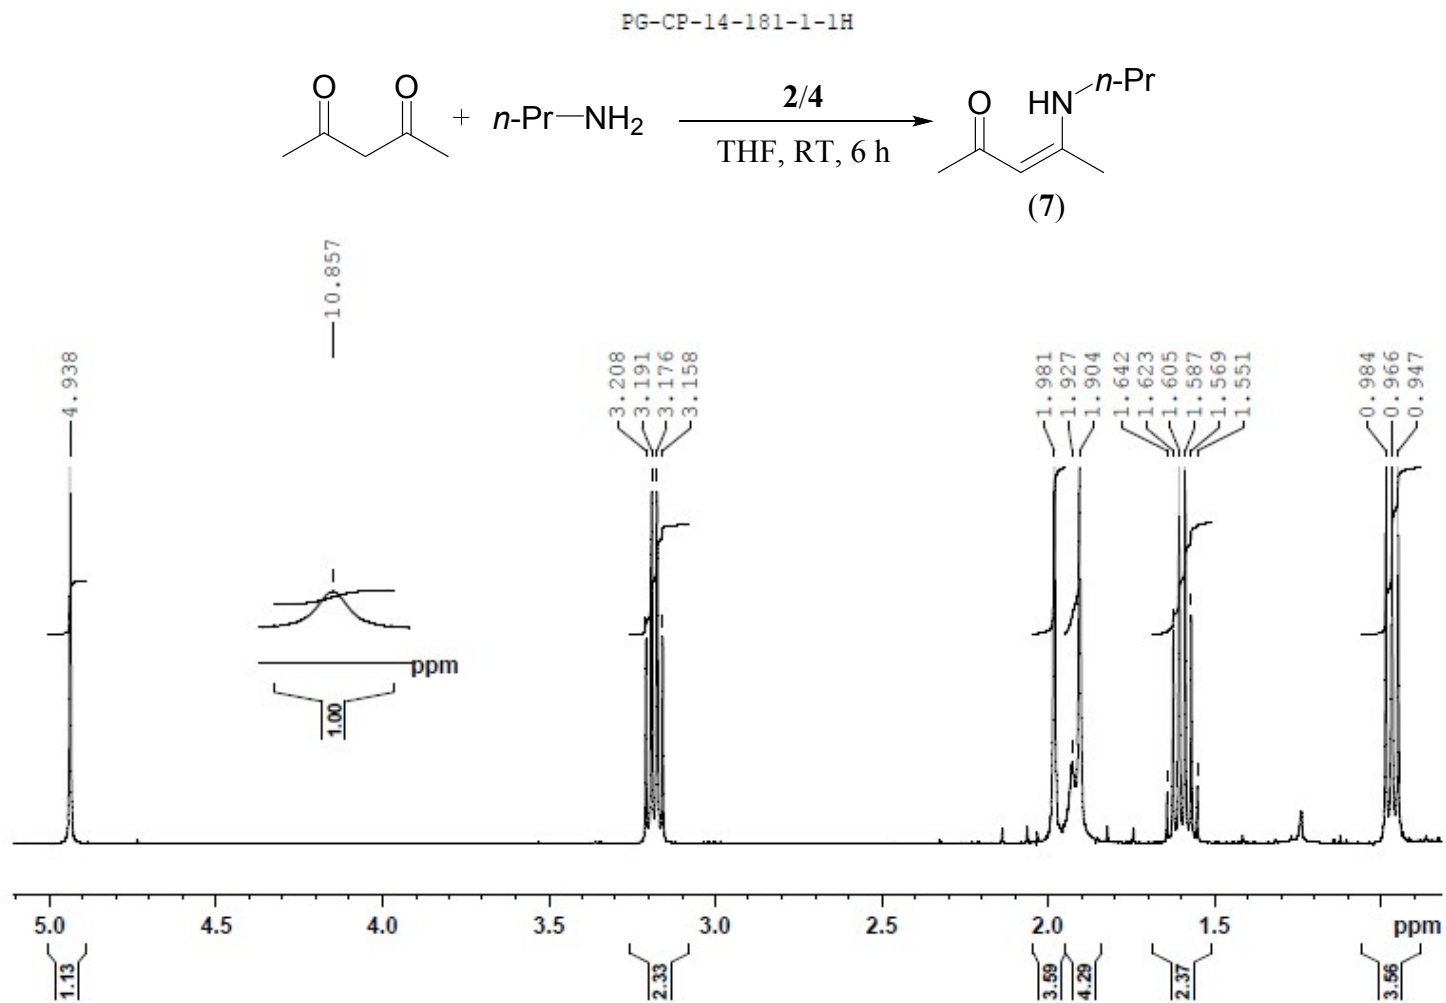

**Fig. S30** Expanded  $^1\text{H}$  NMR spectrum of 7 in  $\text{CDCl}_3$  formed in the reaction of acetyl acetone and *n*-propyl amine as catalyzed by the dinuclear  $[\text{CoL}^1]_2$  (2) and  $[\text{CoL}^2]_2$  (4) complexes.



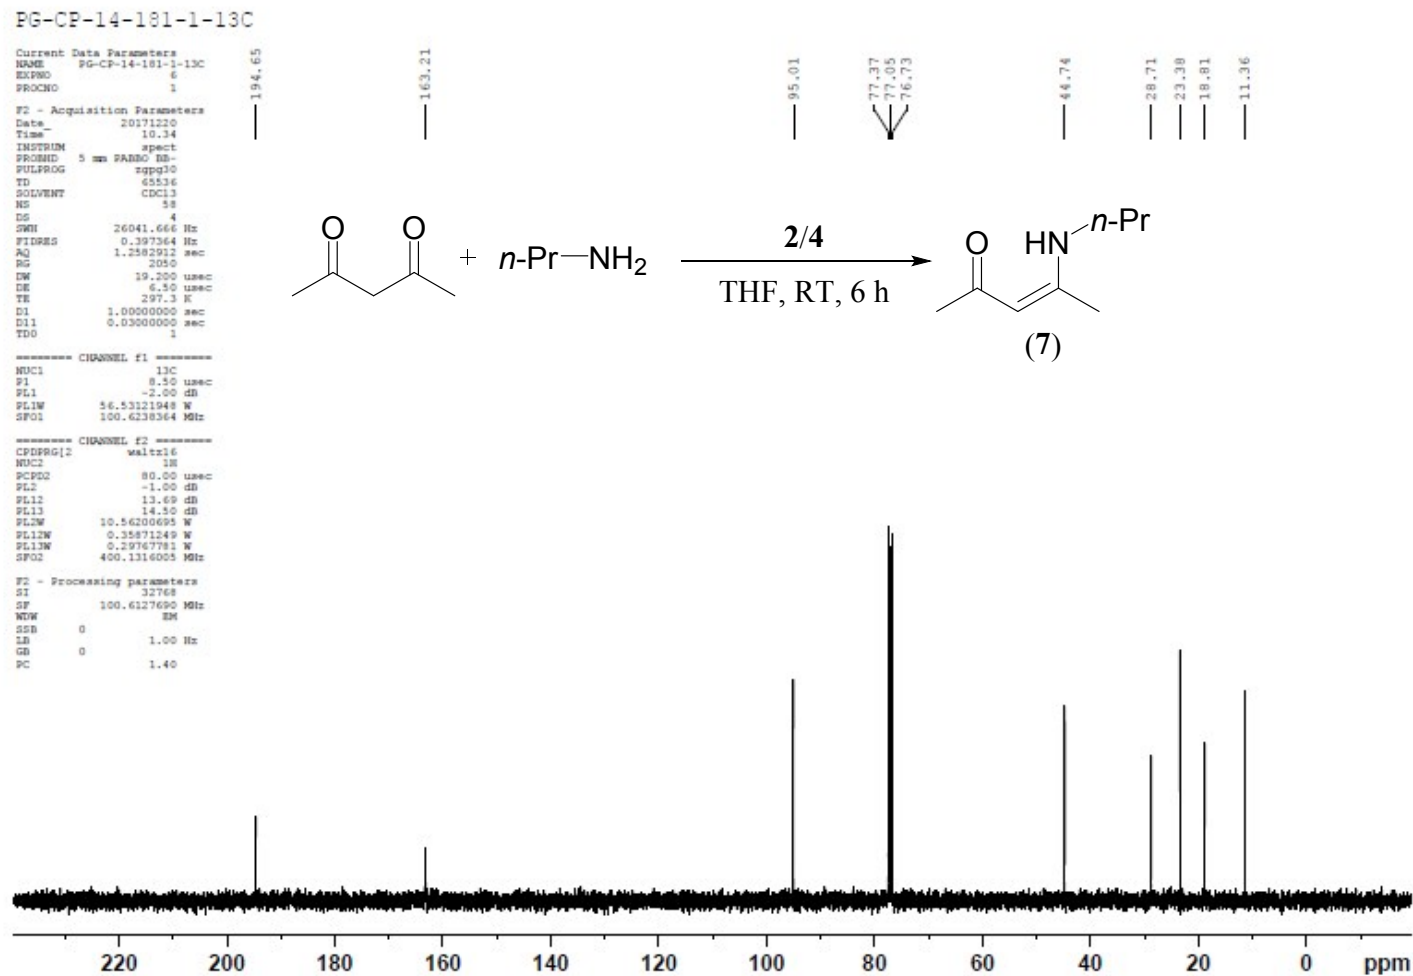

**Fig.S31**  $^{13}\text{C}\{^1\text{H}\}$  NMR spectrum of **7** in  $\text{CDCl}_3$  formed in the reaction of acetyl acetone and ethyl amine as catalyzed by the dinuclear  $[\text{CoL}^1]_2$  (**2**) and  $[\text{CoL}^2]_2$  (**4**) complexes.

File :F:\GCMSDATA2017\DECEMBER-2017\PG-CP-14-181-1.D  
 Operator : CP  
 Acquired : 18 Dec 2017 16:20 using AcqMethod COMMON METHOD-2017.M  
 Instrument : GCMS  
 Sample Name: PG-CP-14-181-1  
 disc Info :  
 Prial Number: 3

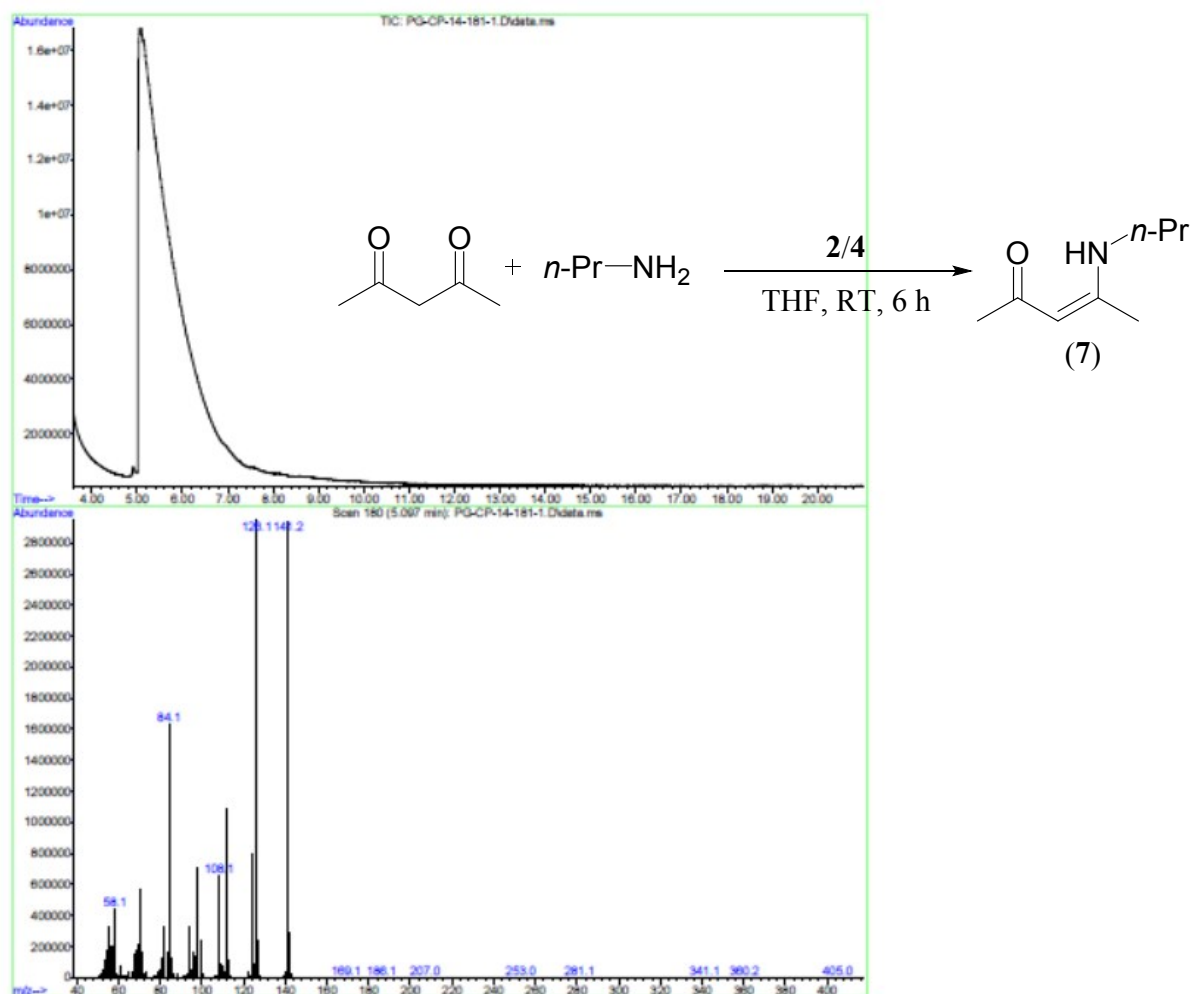

**Fig. S32** GCMS trace of 7 ( $m/z$  141) in EtOAc formed in the reaction of acetyl acetone and *n*-propyl amine as catalyzed by the the dinuclear [CoL<sup>1</sup>]<sub>2</sub> (**2**) and [CoL<sup>2</sup>]<sub>2</sub> (**4**) complexes.

```

Current Data Parameters
NAME PG-CP-14-184-1-1H
EXPNO 3
PROCNO 1

F2 - Acquisition Parameters
Date_ 20171222
Time_ 8.15
INSTRUM spect
PROBHD 5 mm PABBO BB-
PULPROG zg30
TD 64274
SOLVENT CDCl3
NS 9
DS 0
SWH 8223.605 Hz
FIDRES 0.151522 Hz
AQ 3.2998593 sec
RG 32
DW 60.800 usec
DE 6.50 usec
TE 296.1 K
DL 1.00000000 sec
TDO 1

===== CHANNEL f1 =====
NUC1 1H
P1 14.75 usec
PL1 -1.00 dB
PL1W 10.56200695 W
SFO1 400.1324710 MHz

F2 - Processing parameters
SI 32768
SF 400.1300095 MHz
WDW EM
SSB 0
LB 0.30 Hz
GB 0
PC 1.00

```

PG-CP-14-184-1-1H

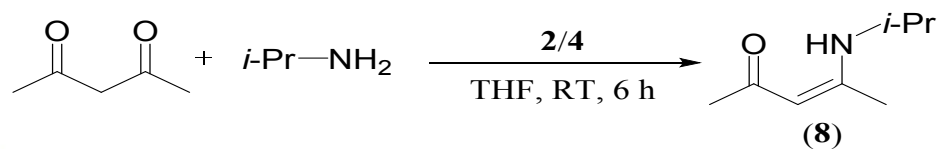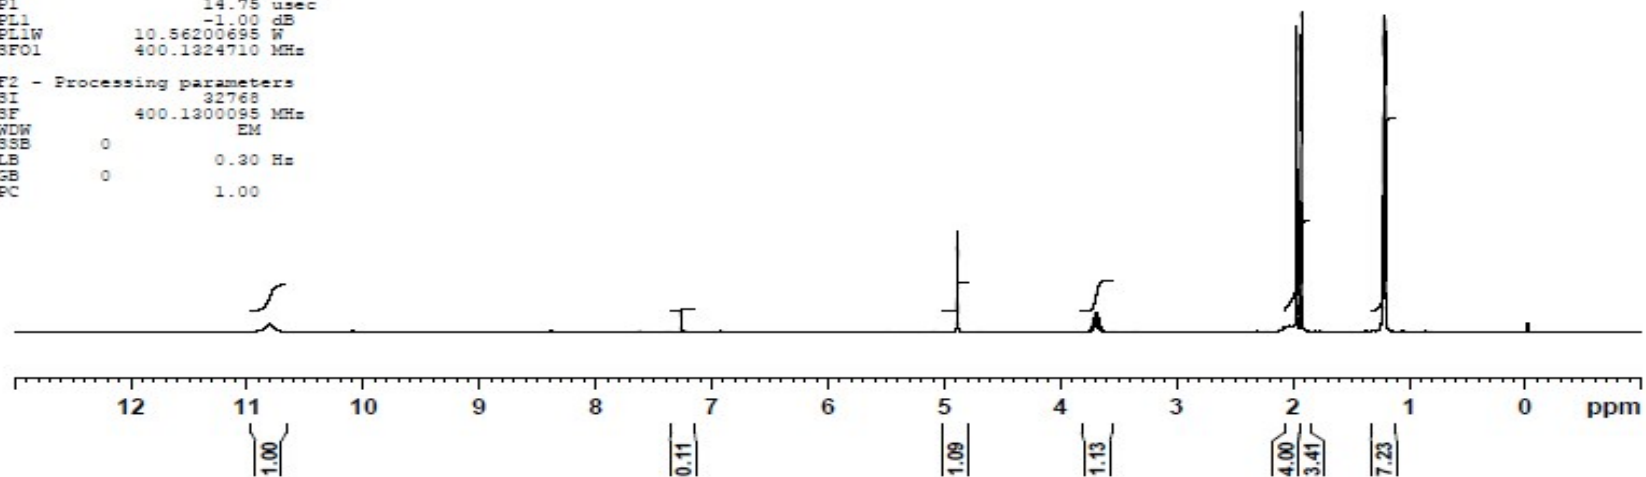

**Fig.S33** <sup>1</sup>H NMR spectrum of **8** in CDCl<sub>3</sub> formed in the reaction of acetyl acetone and *i*-propyl amine as catalyzed by the dinuclear [CoL<sup>1</sup>]<sub>2</sub> (**2**) and [CoL<sup>2</sup>]<sub>2</sub> (**4**) complexes.

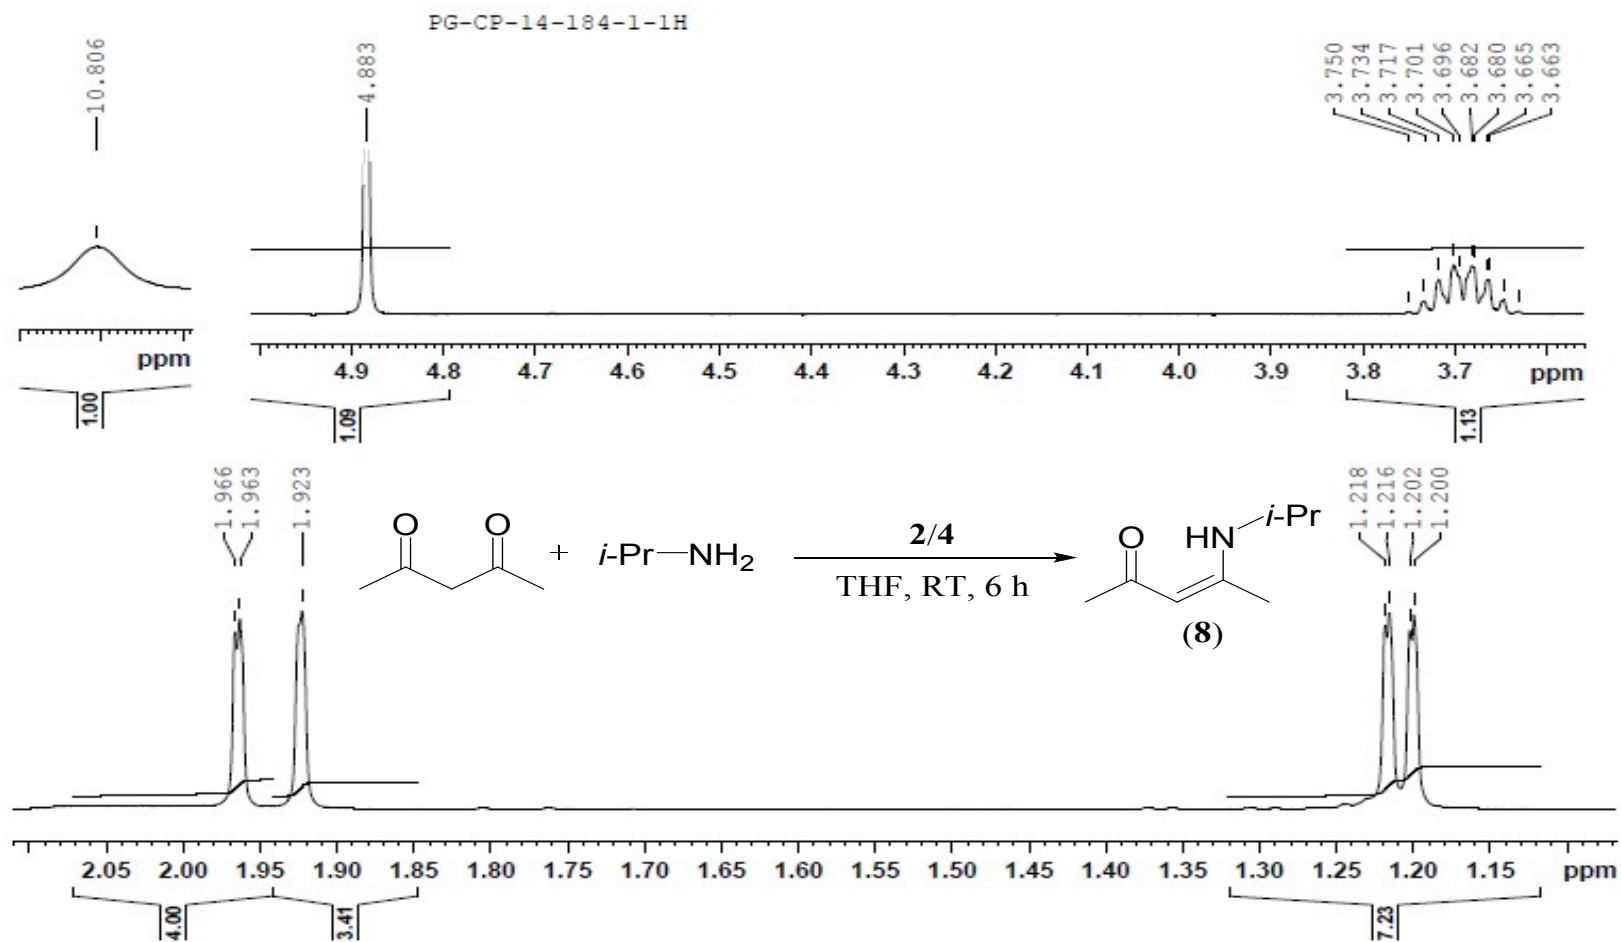

**Fig. S34** Expanded  $^1\text{H}$  NMR spectrum of **8** in  $\text{CDCl}_3$  formed in the reaction of acetyl acetone and *i*-propyl amine as catalyzed by the dinuclear  $[\text{CoL}^1]_2$  (**2**) and  $[\text{CoL}^2]_2$  (**4**) complexes.

PG-CP-14-184-1-13C

```

Current Data Parameters
NAME      PG-CP-14-184-1-13C
EXPNO     4
PROCNO    1
-----
F2 - Acquisition Parameters
Date_     20171222
Time      8.18
INSTRUM   spect
PROBHD    5 mm PABBO BB-
PULPROG   zgpg30
TD         65536
SOLVENT   CDCl3
NS         66
DS         4
SWH        26041.666 Hz
FIDRES     0.397364 Hz
AQ         1.2582912 sec
RG         2050
DM         19.200 usec
DE         6.50 usec
TE         298.5 K
D1         1.0000000 sec
D11        0.0300000 sec
TD0        1
-----
CHANNEL f1
NUC1       13C
P1         8.50 usec
PL1        -2.00 dB
PL1W       56.53121948 W
SFO1       100.6238364 MHz
-----
CHANNEL f2
CPDPRG2   waltz16
NUC2       1H
PCPD2     80.00 usec
PL2        -1.00 dB
PL12       13.69 dB
PL13       14.50 dB
PL2W      10.56200695 W
PL12W     0.35871249 W
PL13W     0.29767781 W
SFO2       400.1316005 MHz
-----
F2 - Processing parameters
SI         32768
SF         100.6127453 MHz
WDW        EM
SSB        0
LB         1.00 Hz
GB         0
PC         1.40
  
```

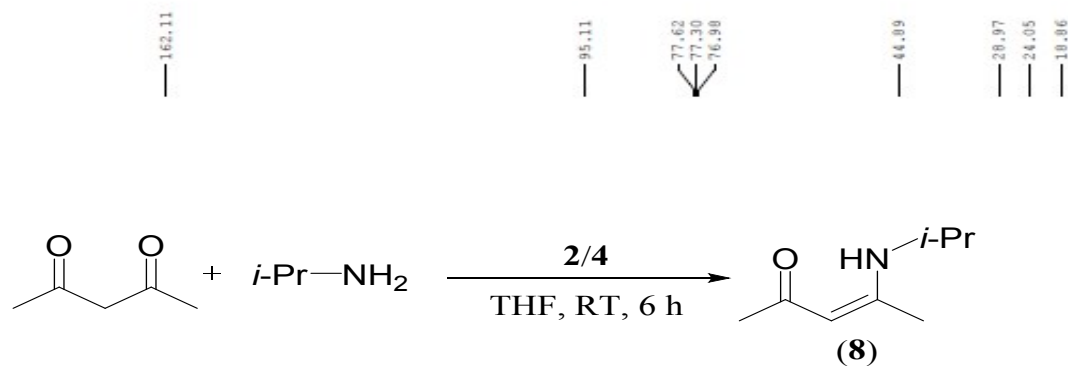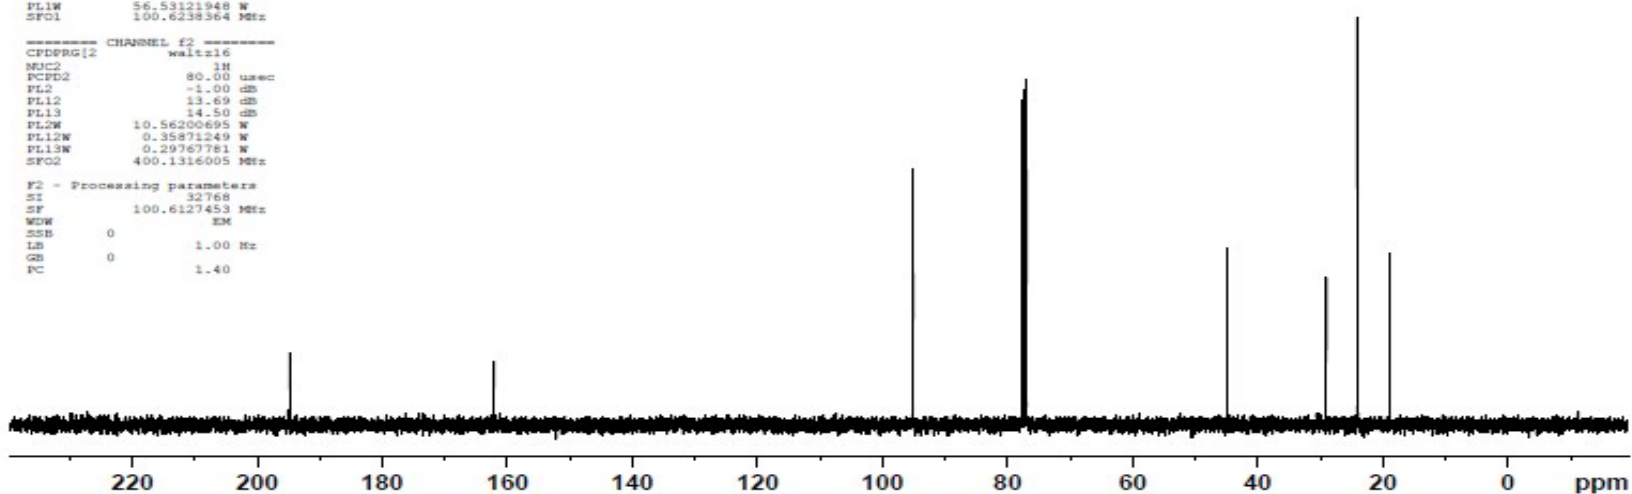

Fig. S35  $^{13}\text{C}\{^1\text{H}\}$  NMR spectrum of **8** in  $\text{CDCl}_3$  formed in the reaction of acetyl acetone and ethyl amine as catalyzed by the dinuclear  $[\text{CoL1}]_2$  (**2**) and  $[\text{CoL2}]_2$  (**4**) complexes.

File : F:\GCMSDATA2017\DECEMBER-2017\PG-CP-14-184-1.D  
Operator :  
Acquired : 19 Dec 2017 23:00 using AcqMethod COMMON METHOD-2017.M  
Instrument : GCMS  
Sample Name: PG-CP-14-184-1  
Misc Info :  
Vial Number: 2

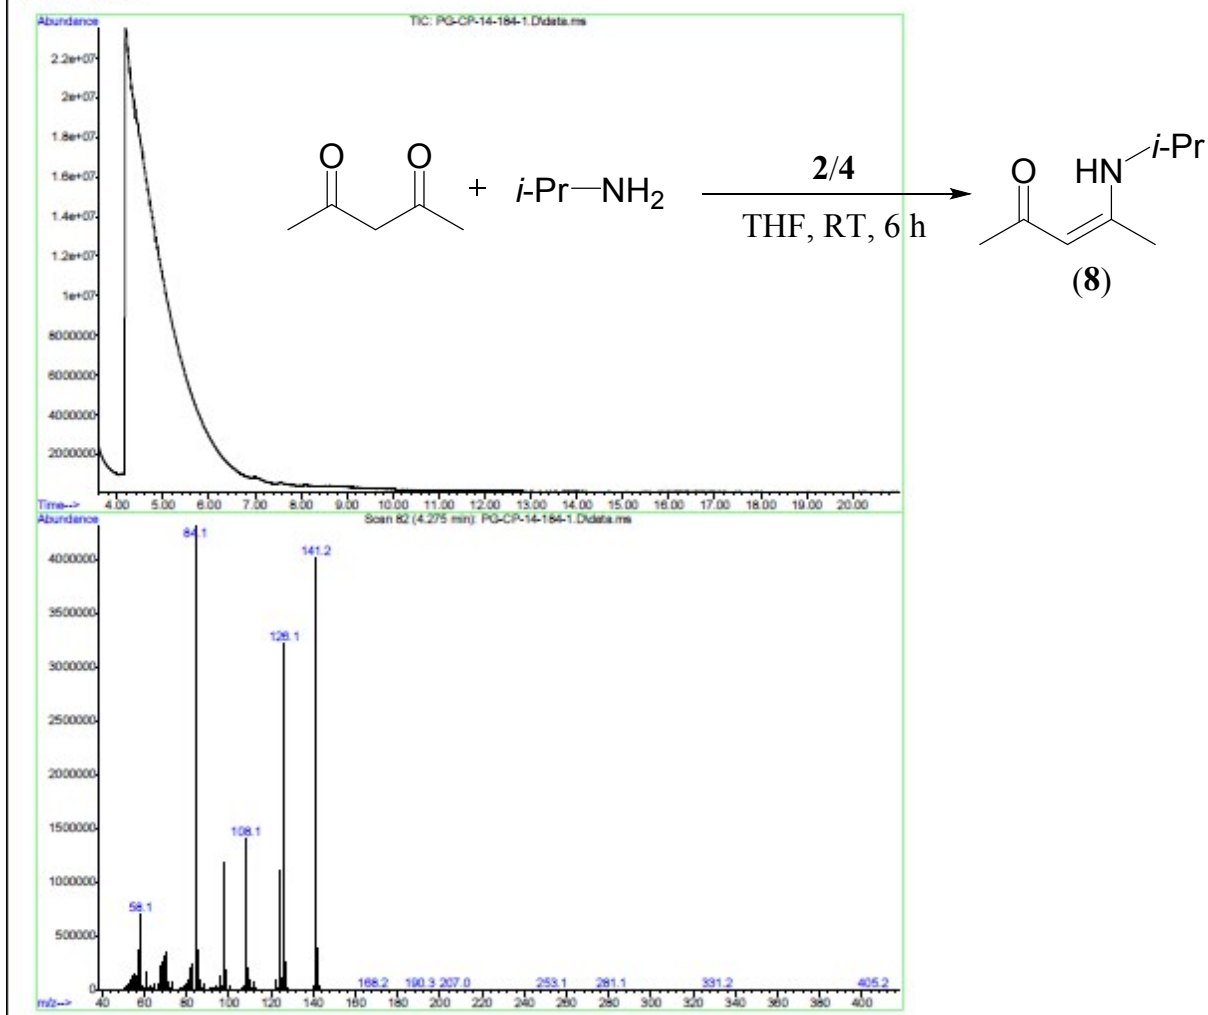

**Fig. S36** GCMS trace of **8** ( $m/z$  141) in EtOAc formed in the reaction of acetyl acetone and *i*-propyl amine as catalyzed by the the dinuclear [CoL<sup>1</sup>]<sub>2</sub> (**2**) and [CoL<sup>2</sup>]<sub>2</sub> (**4**) complexes.

```

Current Data Parameters
NAME PG-CP-14-182-1-1H
EXPNO 1
PROCNO 1

F2 - Acquisition Parameters
Date_ 20171222
Time 8.09
INSTRUM spect
PROBHD 5 mm PABBO BB-
PULPROG zg30
TD 84274
SOLVENT CDCl3
NS 11
DS 0
SWH 8223.685 Hz
FIDRES 0.151522 Hz
AQ 3.2998593 sec
RG 32
LW 60.800 usec
DE 6.80 usec
TE 296.0 K
DL 1.00000000 sec
TDO 1

===== CHANNEL f1 =====
NUC1 1H
P1 14.75 usec
PL1 -1.00 dB
PL1W 10.56200695 W
SFO1 400.1324710 MHz

F2 - Processing parameters
SI 32768
SF 400.1300100 MHz
WDW EM
SSB 0
LB 0.30 Hz
GB 0
FC 1.00

```

PG-CP-14-182-1-1H

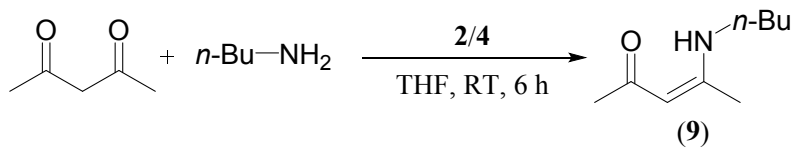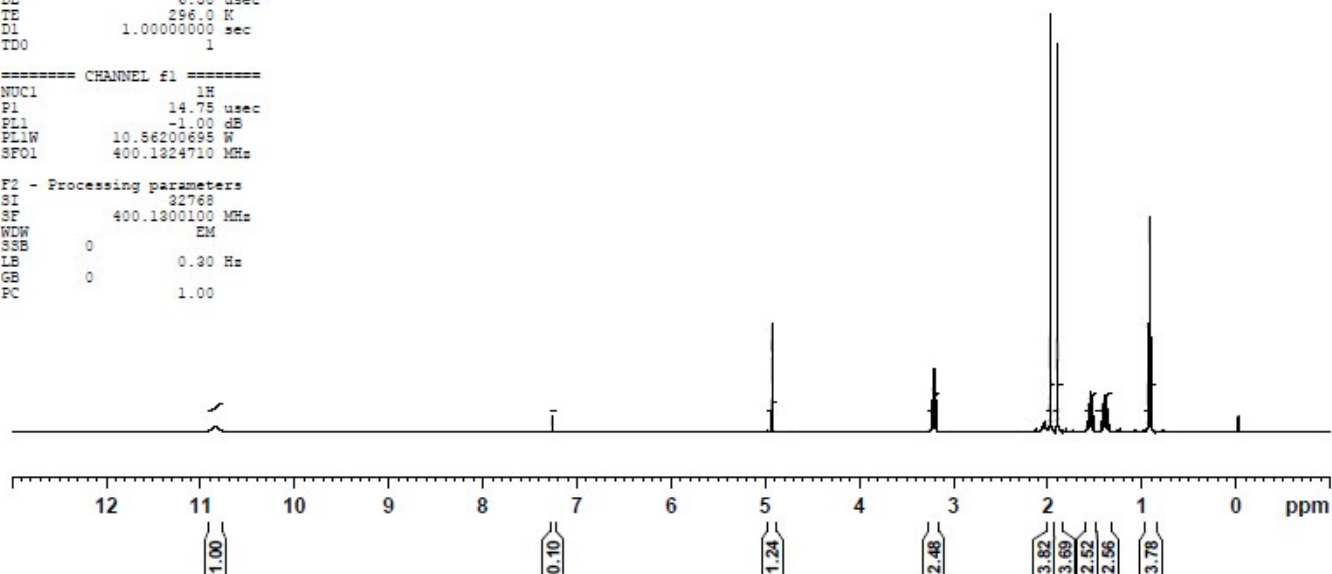

**Fig. S37**  $^1\text{H}$  NMR spectrum of **9** in  $\text{CDCl}_3$  formed in the reaction of acetyl acetone and  $n$ -butyl amine as catalyzed by the dinuclear  $[\text{CoL}^1]_2$  (**2**) and  $[\text{CoL}^2]_2$  (**4**) complexes.

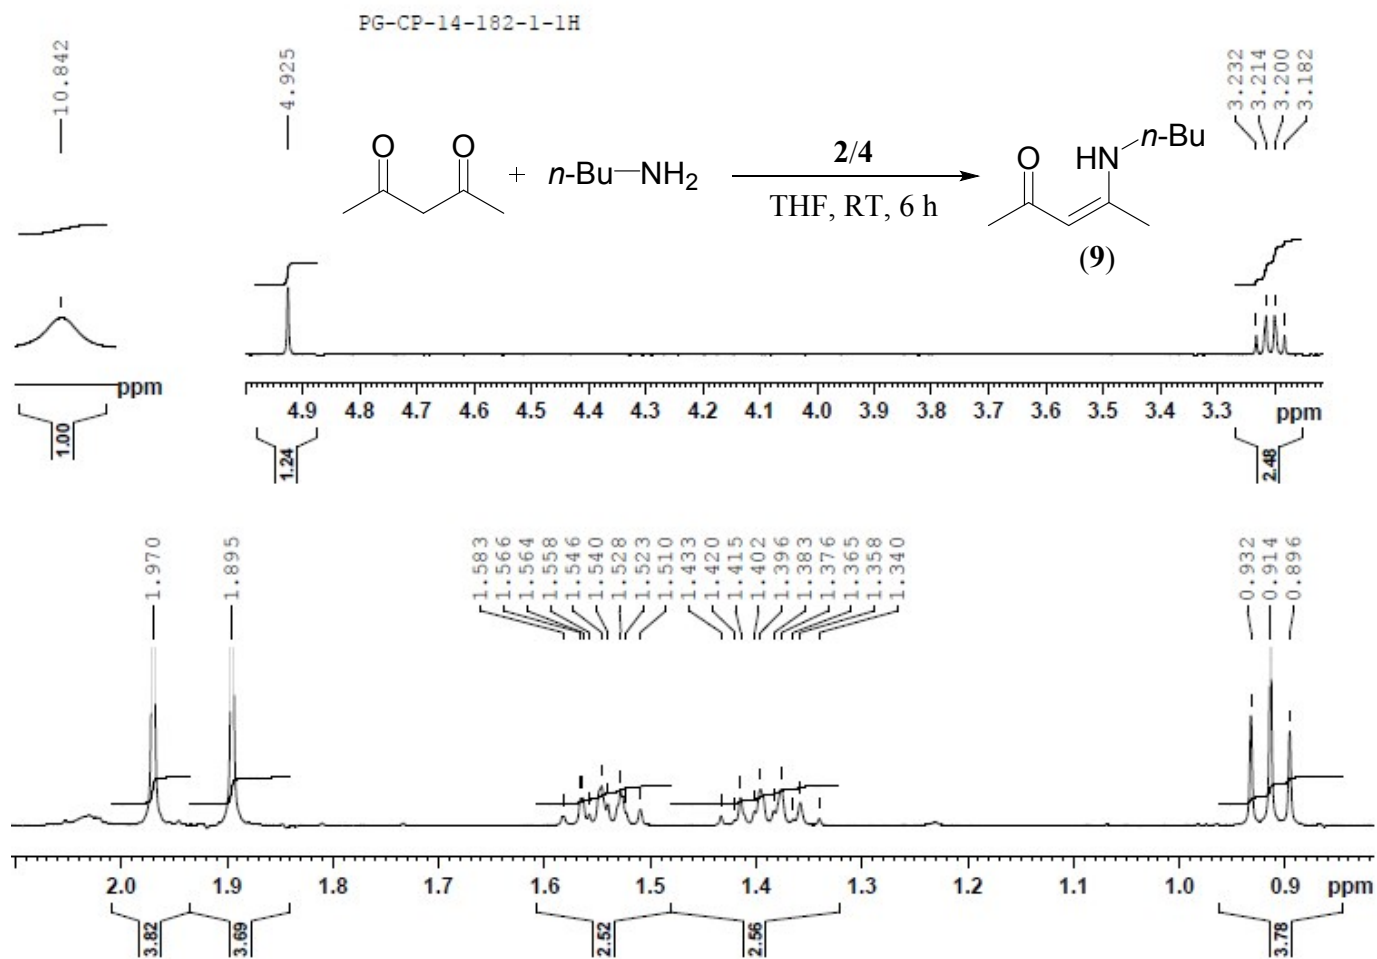

**Fig. S38** Expanded  $^1\text{H}$  NMR spectrum of **9** in  $\text{CDCl}_3$  formed in the reaction of acetyl acetone and  $n$ -butyl amine as catalyzed by the dinuclear  $[\text{CoL1}]_2$  (**2**) and  $[\text{CoL2}]_2$  (**4**) complexes.



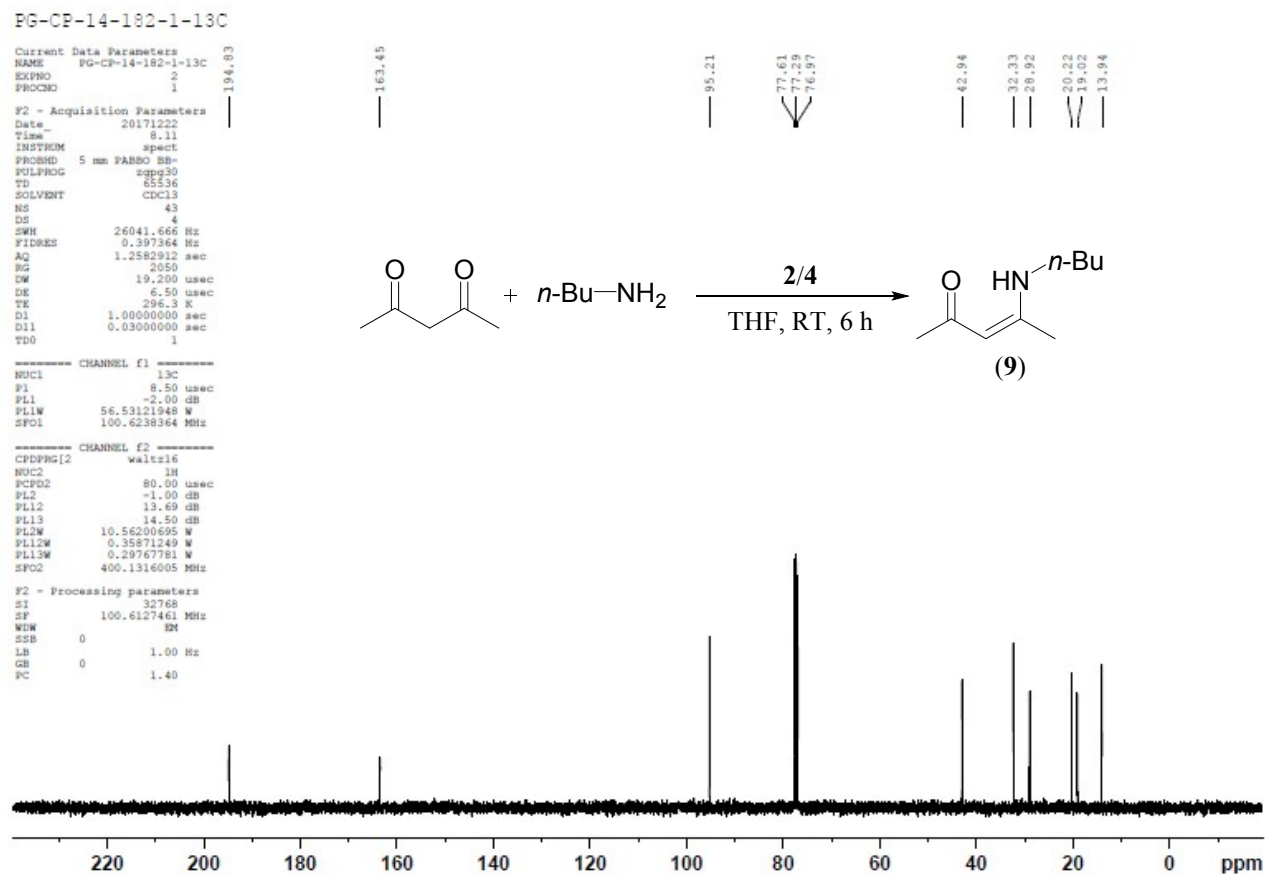

**Fig. S39**  $^{13}\text{C}\{^1\text{H}\}$  NMR spectrum of **8** in  $\text{CDCl}_3$  formed in the reaction of acetyl acetone and ethyl amine as catalyzed by the dinuclear  $[\text{CoL}^1]_2$  (**2**) and  $[\text{CoL}^2]_2$  (**4**) complexes.

File : F:\GCMSDATA2017\DECEMBER-2017\PG-CP-14-182-1.D  
Operator :  
Acquired : 19 Dec 2017 22:35 using AcqMethod COMMON METHOD-2017.M  
Instrument : GCMS  
Sample Name: PG-CP-14-182-1  
Misc Info :  
Vial Number: 1

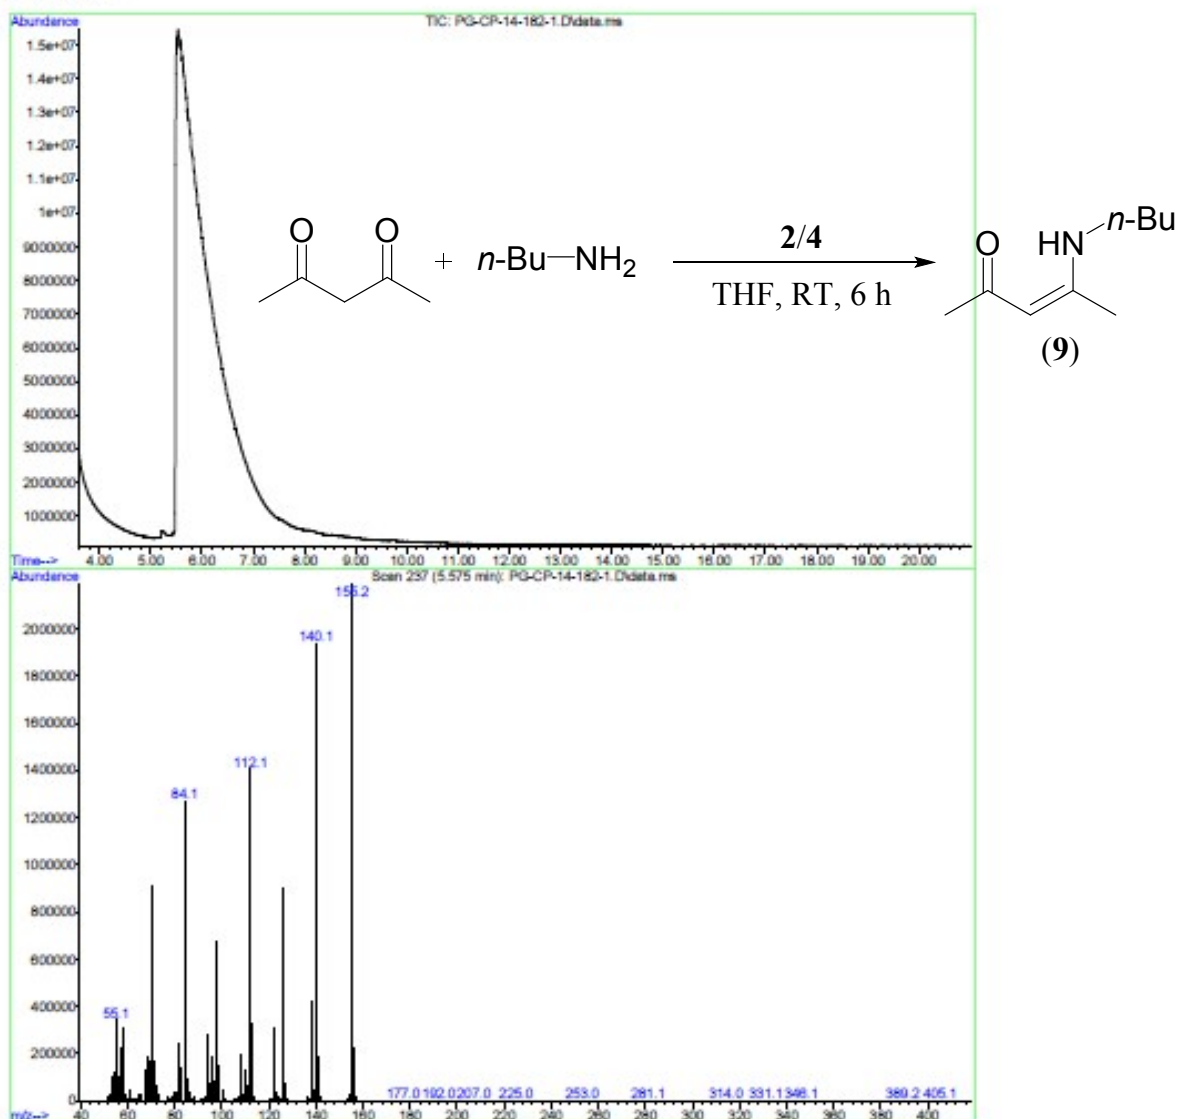

**Fig. S40** GCMS trace of **9** ( $m/z$  155) in EtOAc formed in the reaction of acetyl acetone and *n*-butyl amine as catalyzed by the the dinuclear [CoL<sup>1</sup>]<sub>2</sub> (**2**) and [CoL<sup>2</sup>]<sub>2</sub> (**4**) complexes.

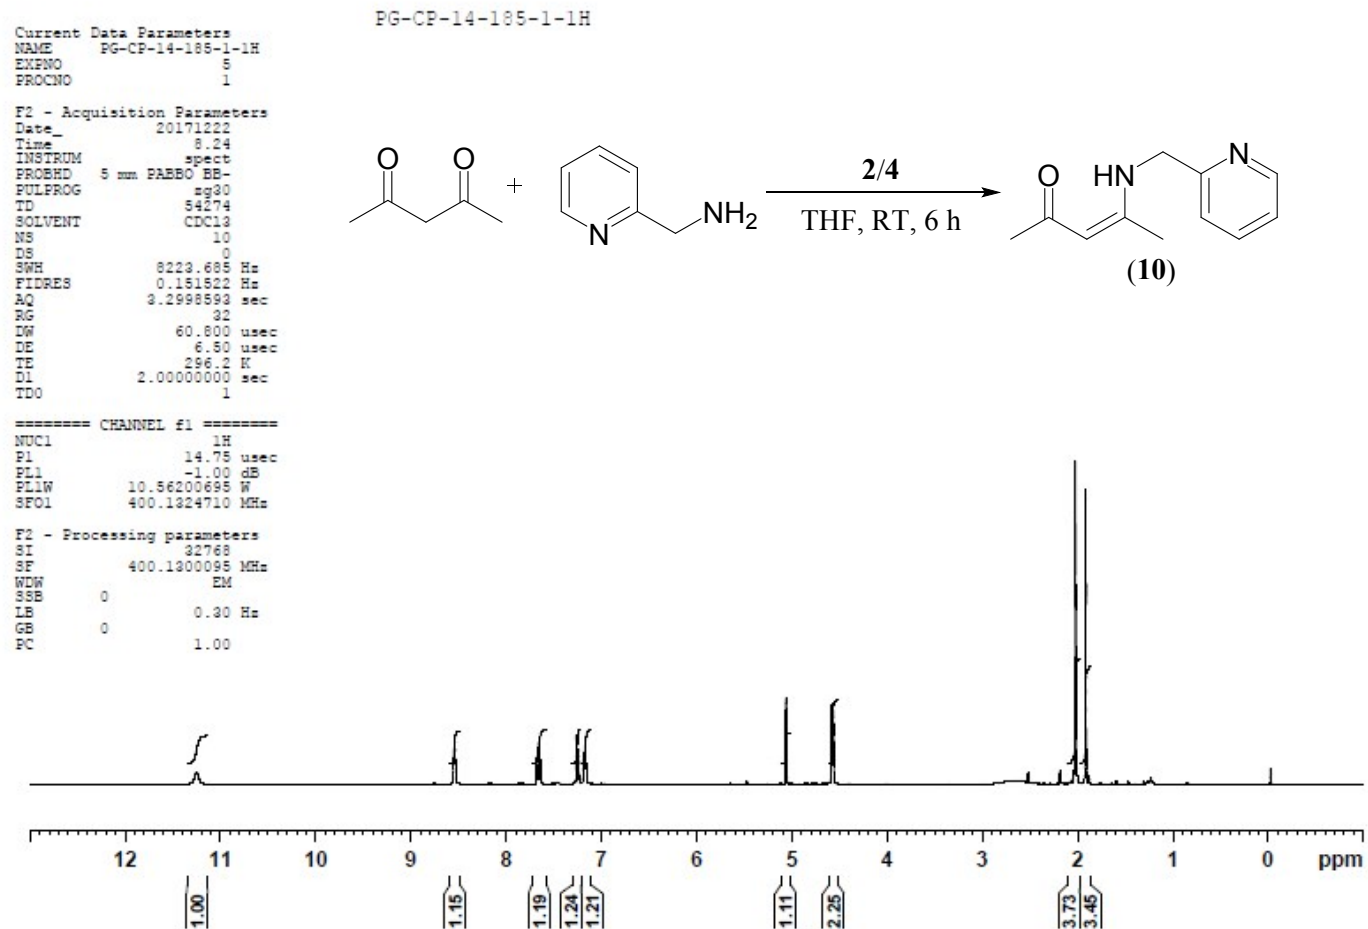

**Fig. S41**  $^1\text{H}$  NMR spectrum of **10** in  $\text{CDCl}_3$  formed in the reaction of acetyl acetone and 2-picolyl amine as catalyzed by the dinuclear  $[\text{CoL}^1]_2$  (**2**) and  $[\text{CoL}^2]_2$  (**4**) complexes.

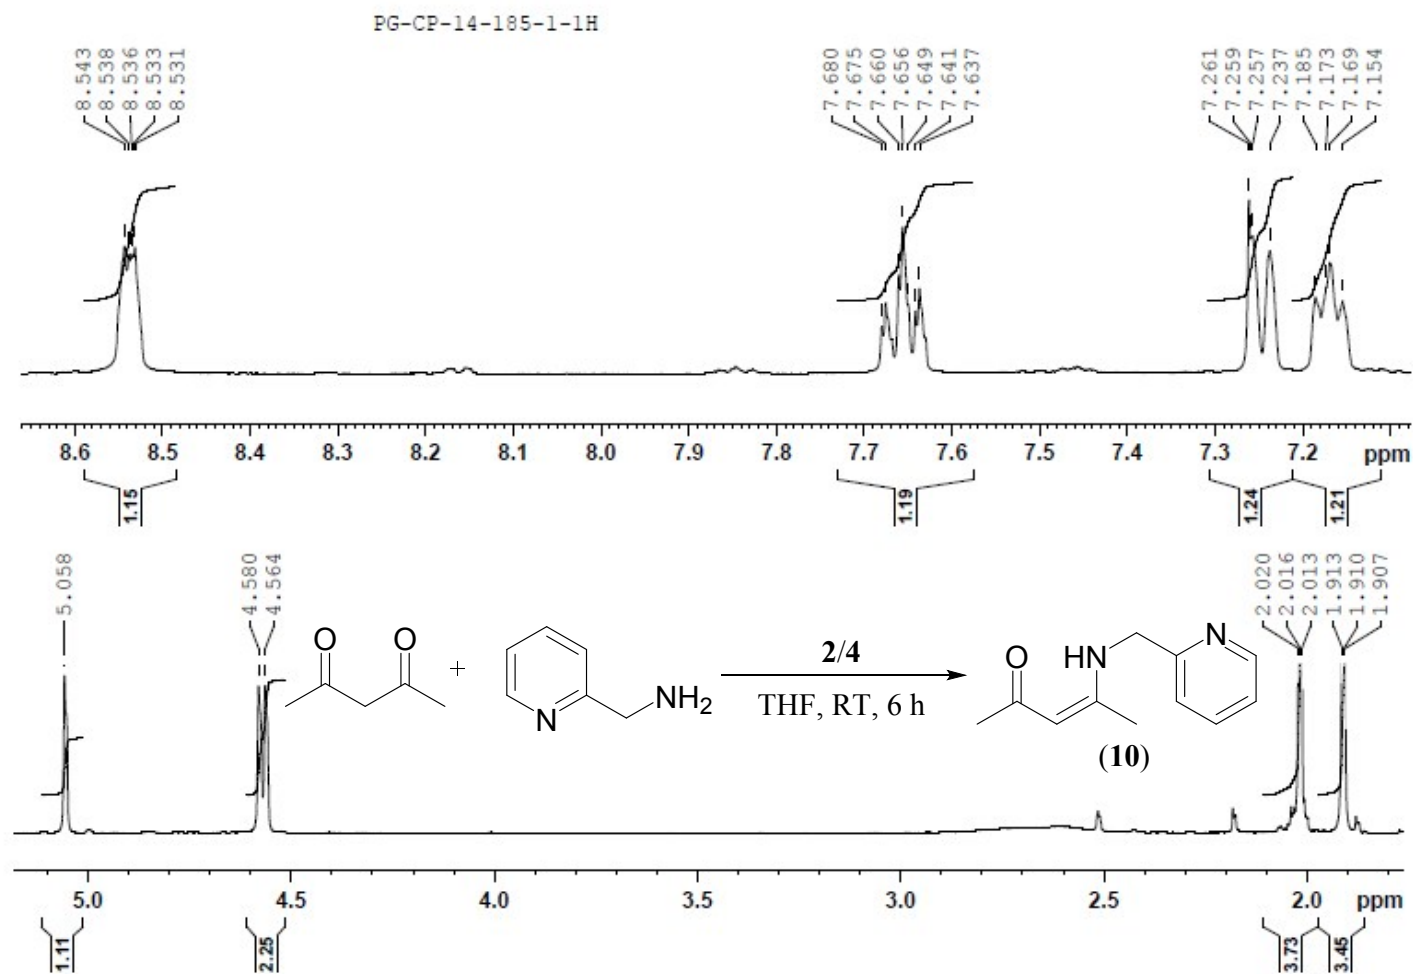

**Fig. S42** Expanded  $^1\text{H}$  NMR spectrum of **10** in  $\text{CDCl}_3$  formed in the reaction of acetyl acetone and 2-picolyl amine as catalyzed by the dinuclear  $[\text{CoL}^1]_2$  (**2**) and  $[\text{CoL}^2]_2$  (**4**) complexes.

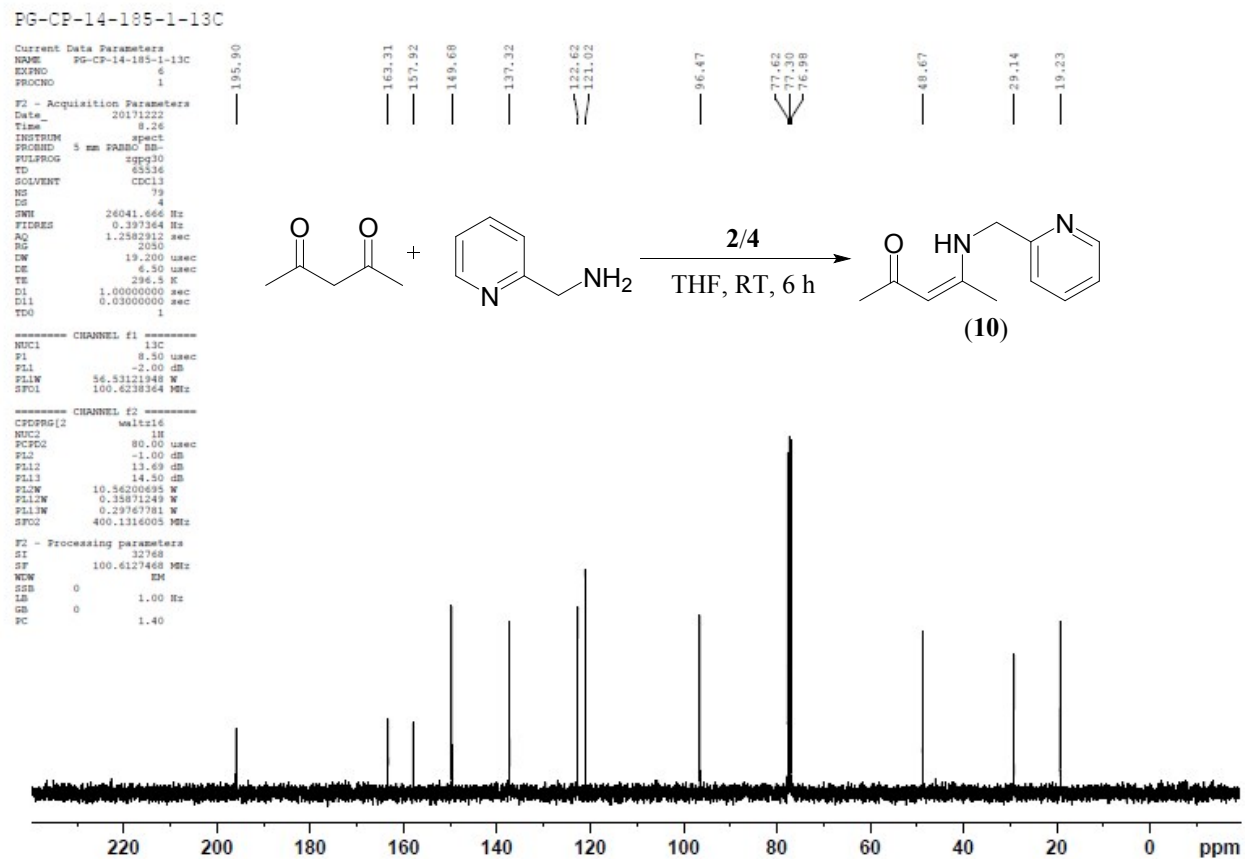

**Fig. S43** <sup>13</sup>C{<sup>1</sup>H} NMR spectrum of **10** in CDCl<sub>3</sub> formed in the reaction of acetyl acetone and ethyl amine as catalyzed by the dinuclear [CoL<sup>1</sup>]<sub>2</sub> (**2**) and [CoL<sup>2</sup>]<sub>2</sub> (**4**) complexes.

File : F:\GCMSDATA2017\DECEMBER-2017\PG-CP-14-185-1.D  
Operator :  
Acquired : 19 Dec 2017 23:25 using AcqMethod COMMON METHOD-2017.M  
Instrument : GCMS  
Sample Name : PG-CP-14-185-1  
Disc Info :  
Vial Number : 3

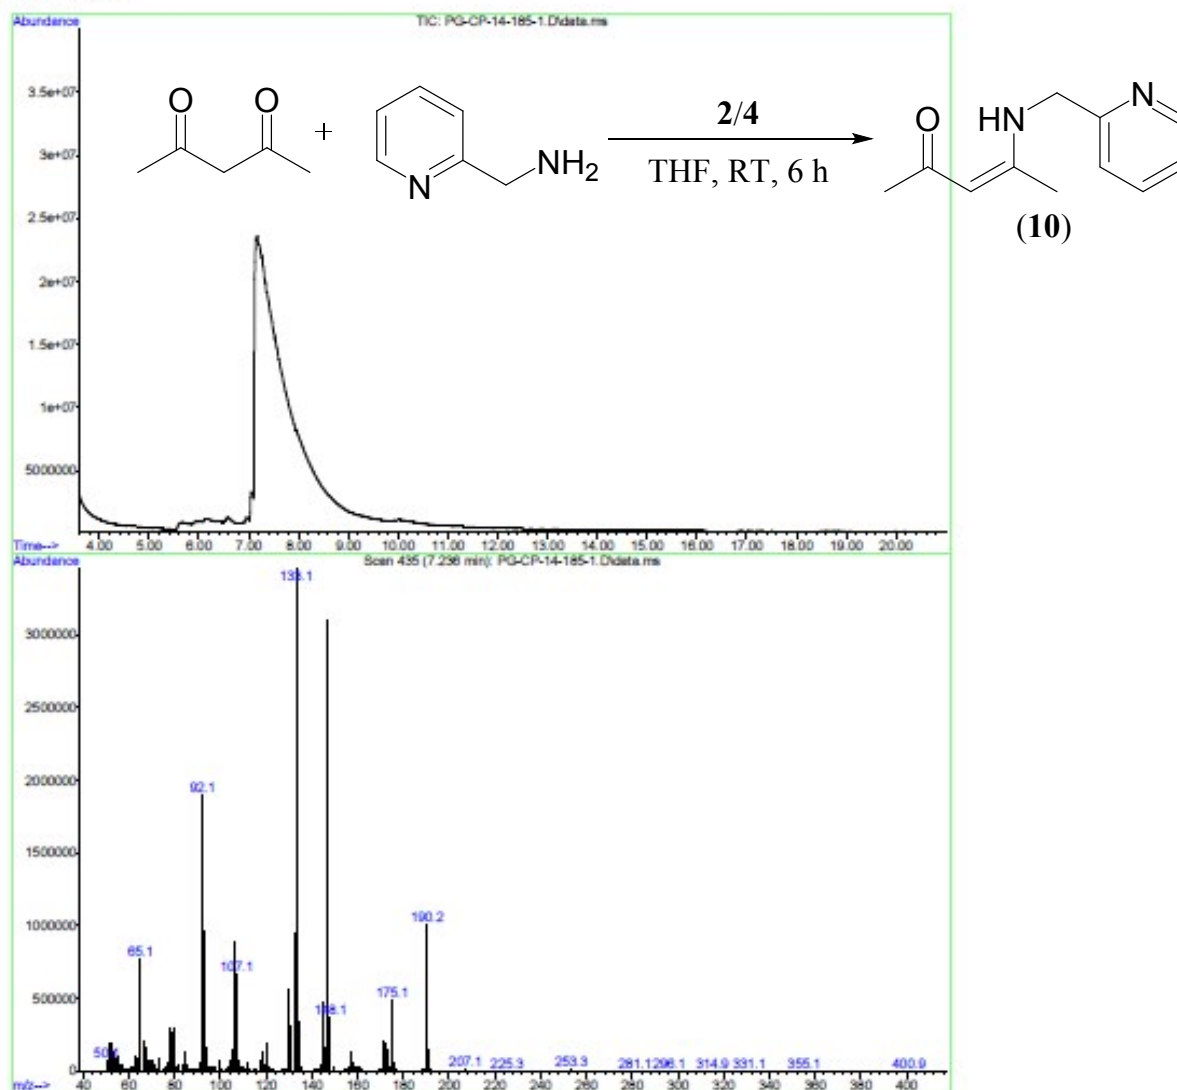

**Fig.S44** GCMS trace of **10** ( $m/z$  190) in EtOAc formed in the reaction of acetyl acetone and 2-picolyl amine as catalyzed by the the dinuclear  $[\text{CoL}^1]_2$  (**2**) and  $[\text{CoL}^2]_2$  (**4**) complexes.

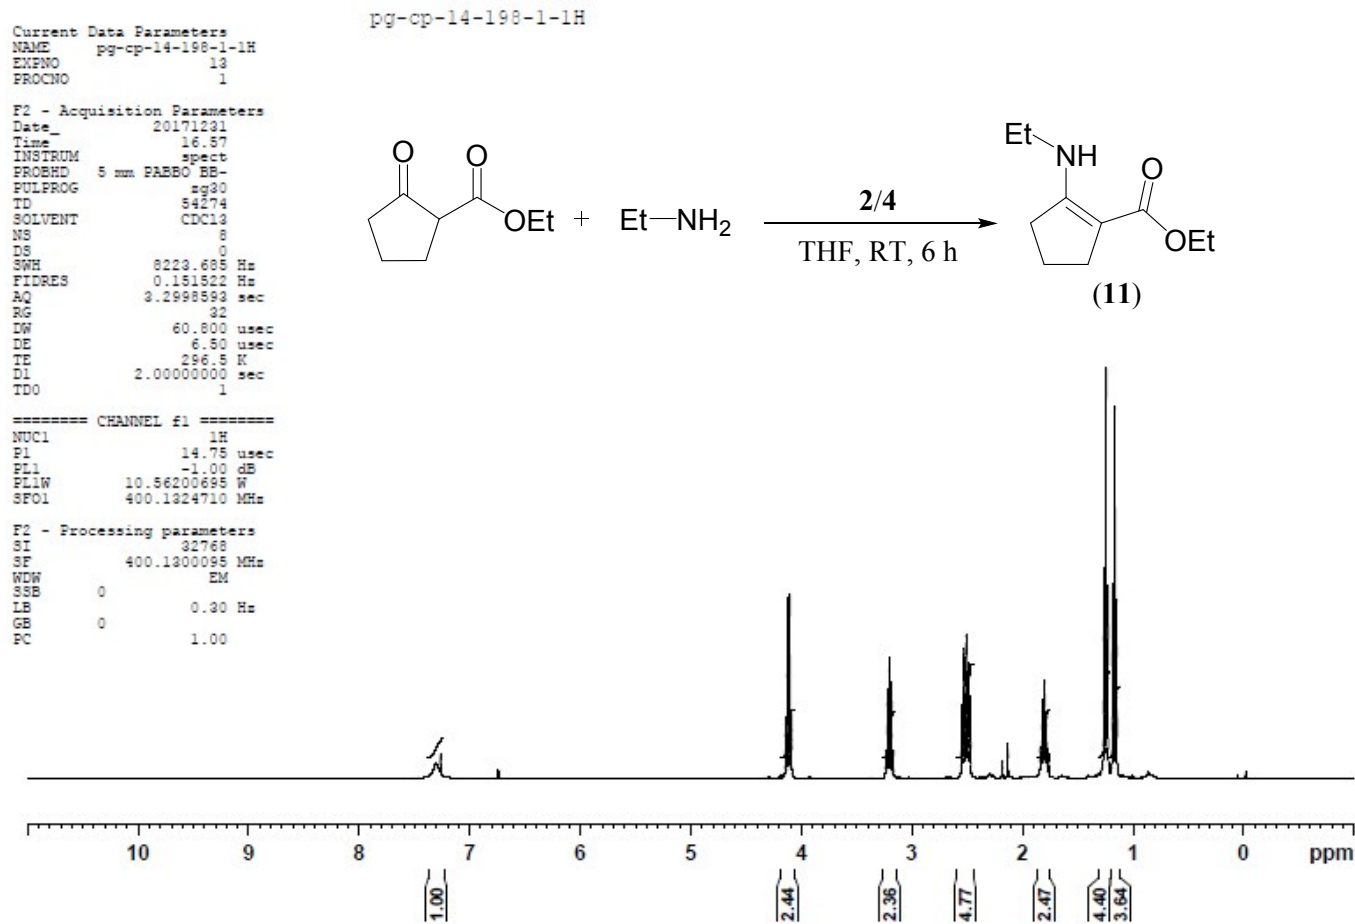

**Fig. S45**  $^1\text{H}$  NMR spectrum of **11** in  $\text{CDCl}_3$  formed in the reaction of ethyl 2-oxocyclopentanecarboxylate and ethyl amine as catalyzed by the dinuclear  $[\text{CoL}^1]_2$  (**2**) and  $[\text{CoL}^2]_2$  (**4**) complexes.

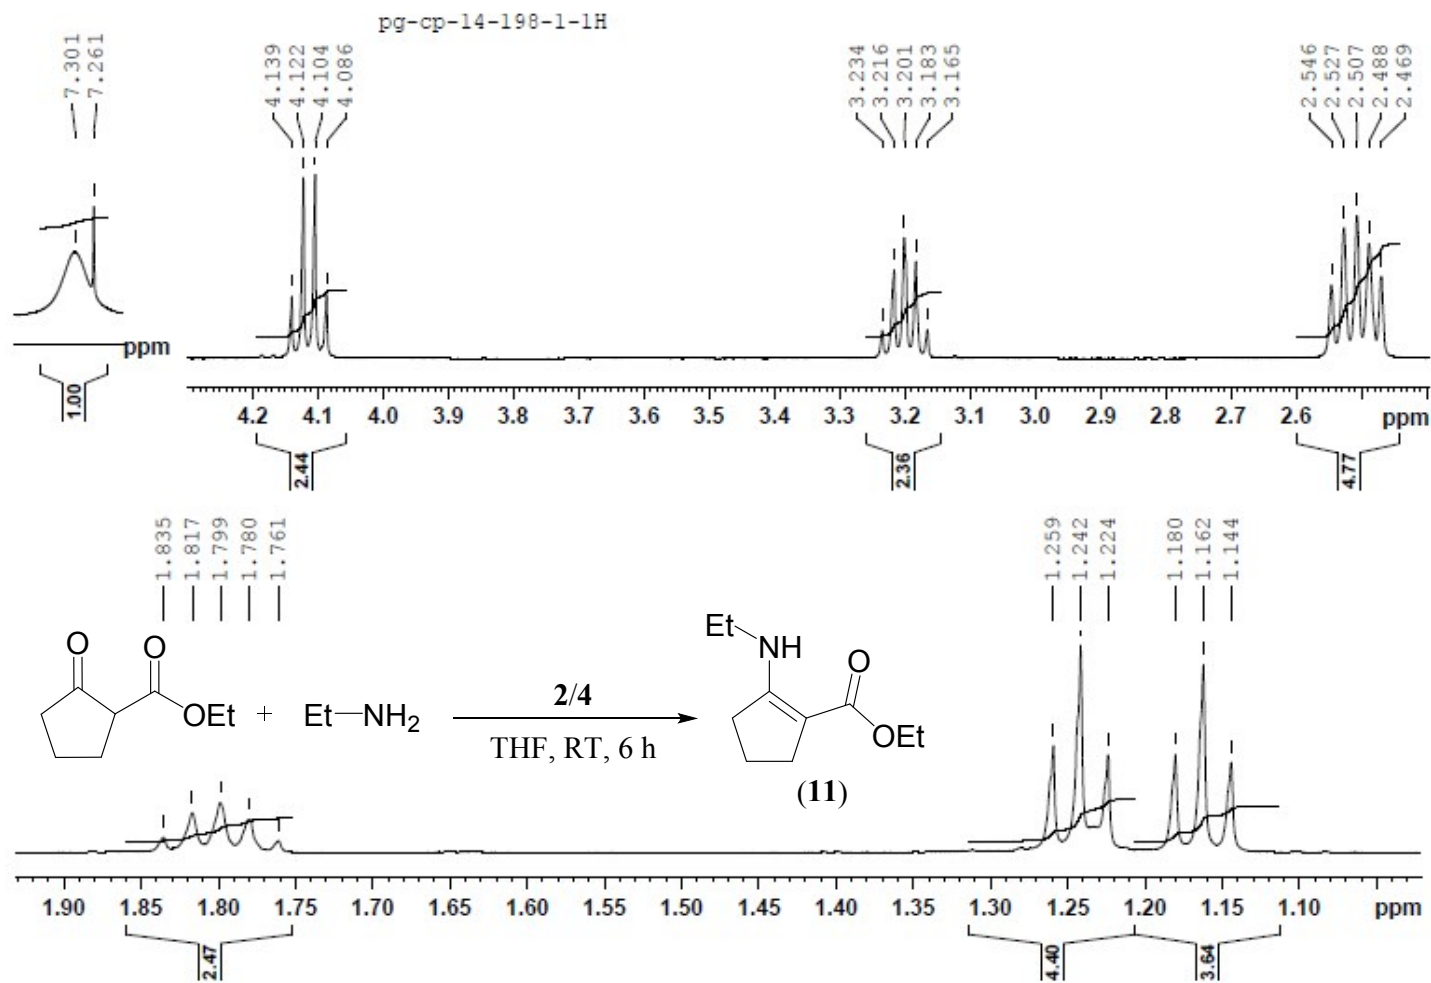

**Fig. S46** Expanded  $^1\text{H}$  NMR spectrum of **11** in  $\text{CDCl}_3$  formed in the reaction of ethyl 2-oxocyclopentanecarboxylate and ethyl amine as catalyzed by the dinuclear  $[\text{CoL}^1]_2$  (**2**) and  $[\text{CoL}^2]_2$  (**4**) complexes.



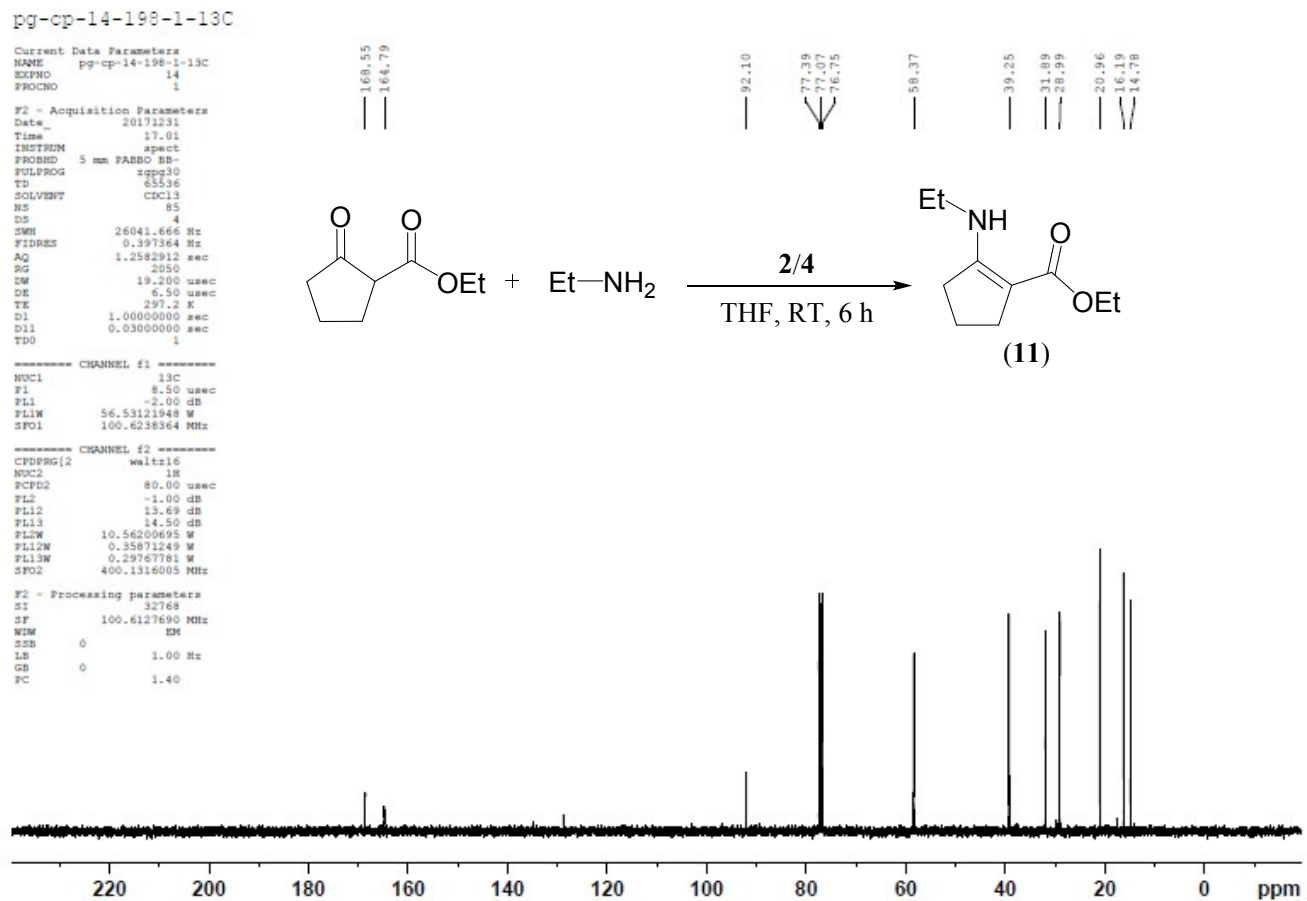

**Fig. S47**  $^{13}\text{C}\{^1\text{H}\}$  NMR spectrum of **11** in  $\text{CDCl}_3$  formed in the reaction of acetyl acetone and ethyl amine as catalyzed by the dinuclear  $[\text{CoL}^1]_2$  (**2**) and  $[\text{CoL}^2]_2$  (**4**) complexes.

File : F:\GCMSDATA2017\DECEMBER-2017\PG-CP-14-198-2.D  
 Operator : MSB  
 Acquired : 30 Dec 2017 12:12 using AcqMethod COMMON METHOD-2017.M  
 Instrument : GCMS  
 Sample Name : PG-CP-14-198-2  
 Misc Info :  
 Vial Number : 4

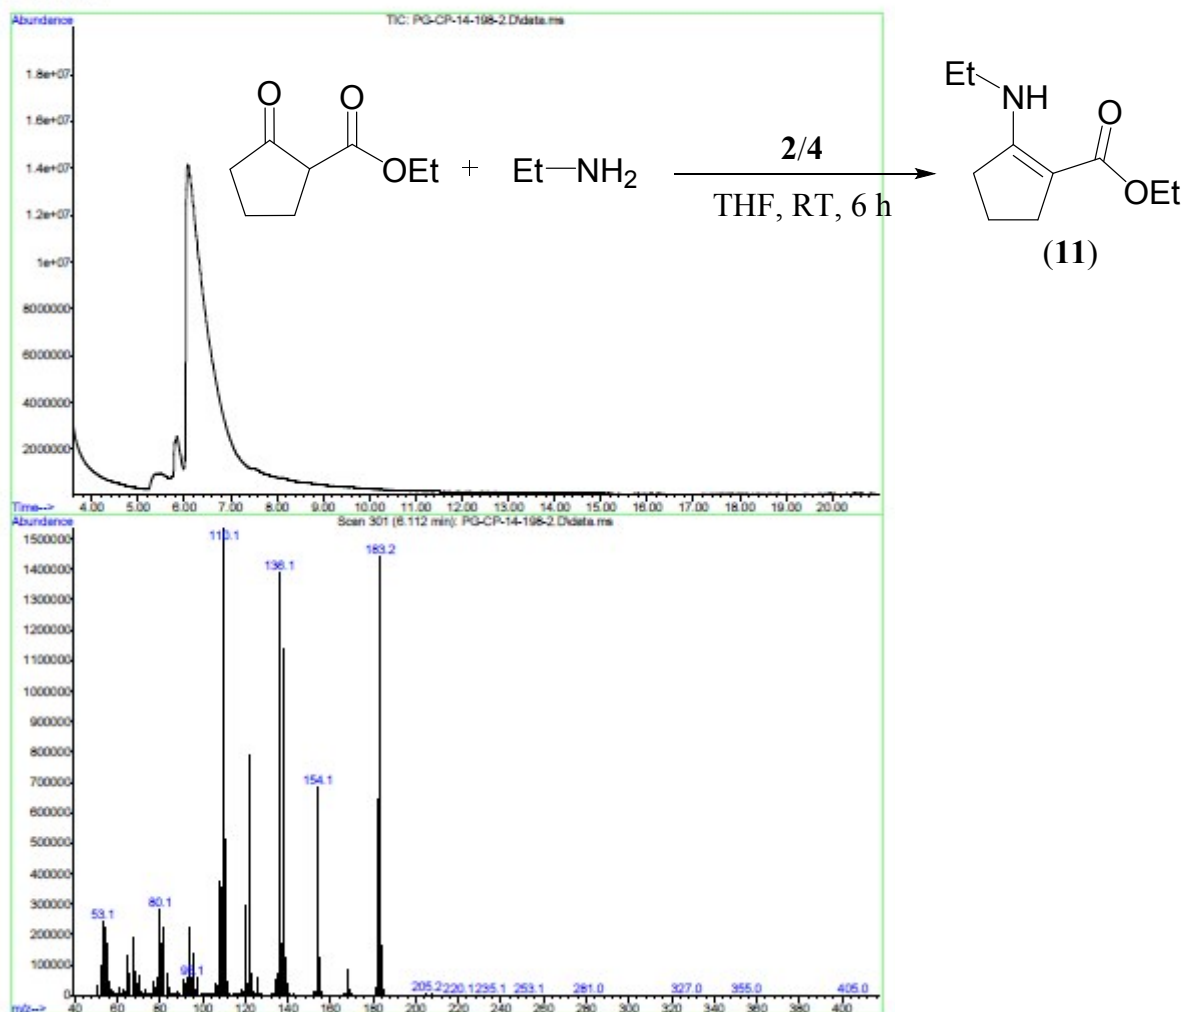

**Fig. S48** GCMS trace of **11** ( $m/z$  183) in EtOAc formed in the reaction of ethyl 2-oxocyclopentanecarboxylate and ethyl amine as catalyzed by the the dinuclear  $[\text{CoL}^1]_2$  (**2**) and  $[\text{CoL}^2]_2$  (**4**) complexes.

## Eager 300 Report

Page: 1 Sample: PG-CP-14-198-1 (PG-CP-14-198-1)

Method Name : PGCP30122017

Method File : D:\CHNS-2017\PGCP30122017.mth

Chromatogram : PG-CP-14-198-1

Operator ID : CHANDNI

Analysed : 12/30/2017 19:02

Sample ID : PG-CP-14-198-1 (# 14)

Analysis Type : UnkNown (Area)

Company Name : C.E. Instruments

Printed : 12/31/2017 22:03

Instrument N. : Instrument #1

Sample weight : 1.068

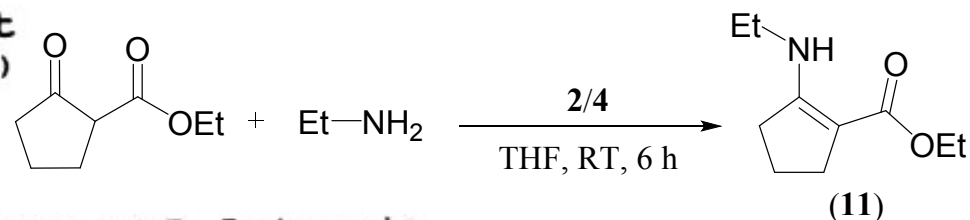

Calib. method : using 'K Factors'

!!! Warning missing one or more peaks.

| Element Name | %       | Ret.Time | Area    | BC | Area ratio | K factor    |
|--------------|---------|----------|---------|----|------------|-------------|
| 1            | 0.0000  | 2        | 135514  | RS |            | 0.0000      |
| Nitrogen     | 7.0577  | 41       | 81682   | RS | 22.042400  | .108364E+07 |
| Carbon       | 64.8684 | 63       | 1800456 | RS | 1.000000   | .259525E+07 |
| Hydrogen     | 9.1551  | 184      | 650466  | RS | 2.767948   | .665260E+07 |
| Totals       | 81.0812 |          | 2668118 |    |            |             |

**Fig.S49** Elemental analysis data of **11** formed in the reaction of ethyl 2-oxocyclopentanecarboxylate and ethyl amine as catalyzed by the dinuclear  $[\text{CoL}^1]_2$  (**2**) and  $[\text{CoL}^2]_2$  (**4**) complexes.

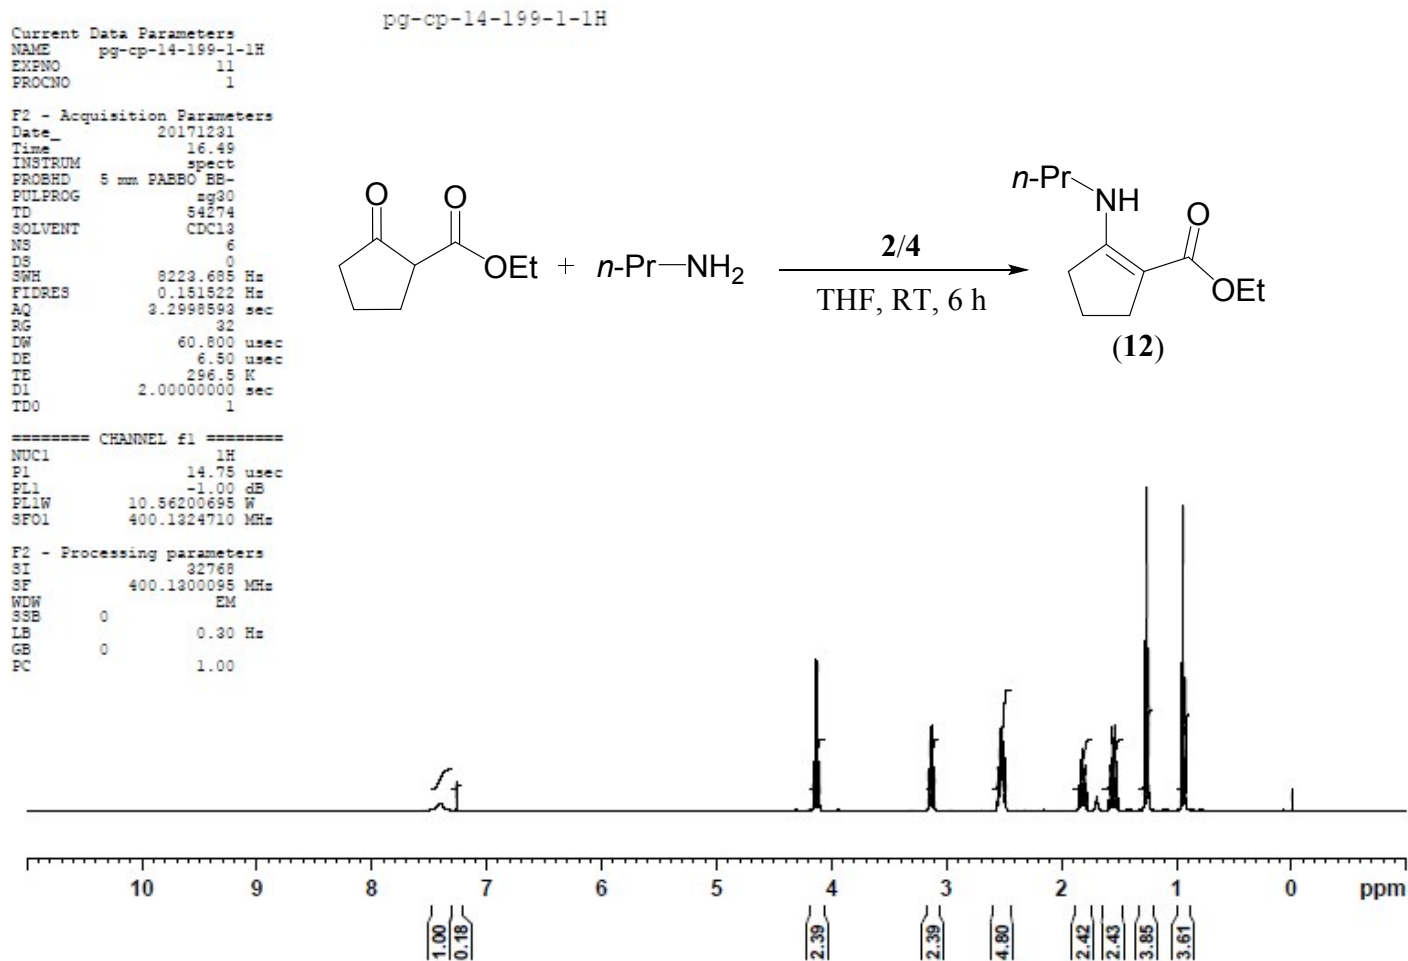

**Fig.S50**  $^1\text{H}$  NMR spectrum of **12** in  $\text{CDCl}_3$  formed in the reaction of ethyl 2-oxocyclopentanecarboxylate and *n*-propyl amine as catalyzed by the dinuclear  $[\text{CoL}^1]_2$  (**2**) and  $[\text{CoL}^2]_2$  (**4**) complexes.

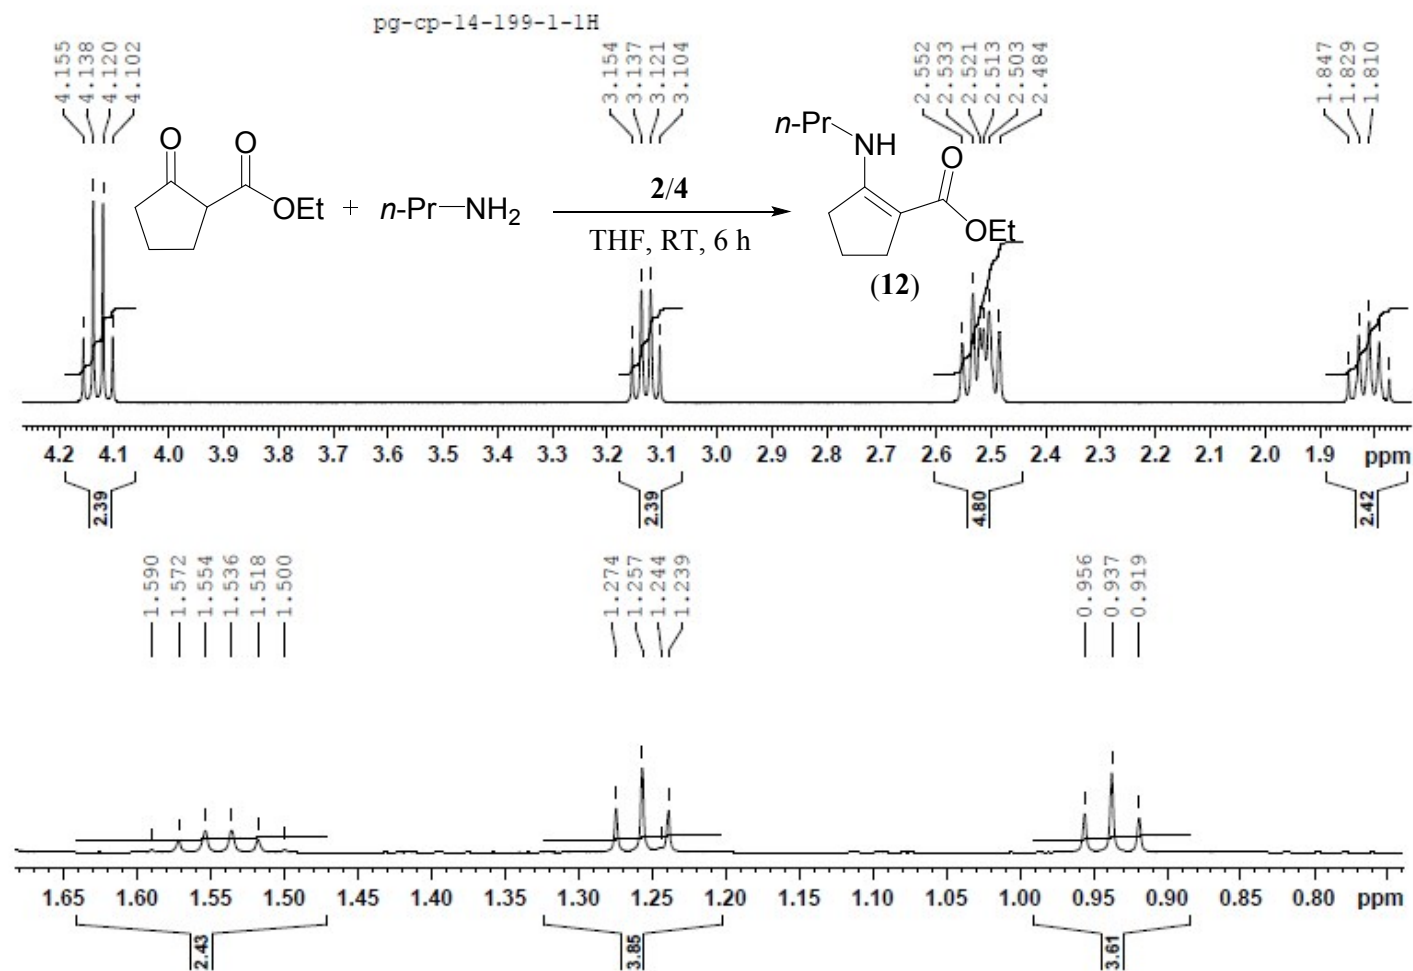

**Fig. S51** Expanded <sup>1</sup>H NMR spectrum of **12** in CDCl<sub>3</sub> formed in the reaction of ethyl 2-oxocyclopentanecarboxylate and *n*-propyl amine as catalyzed by the dinuclear [CoL<sup>1</sup>]<sub>2</sub> (**2**) and [CoL<sup>2</sup>]<sub>2</sub> (**4**) complexes.

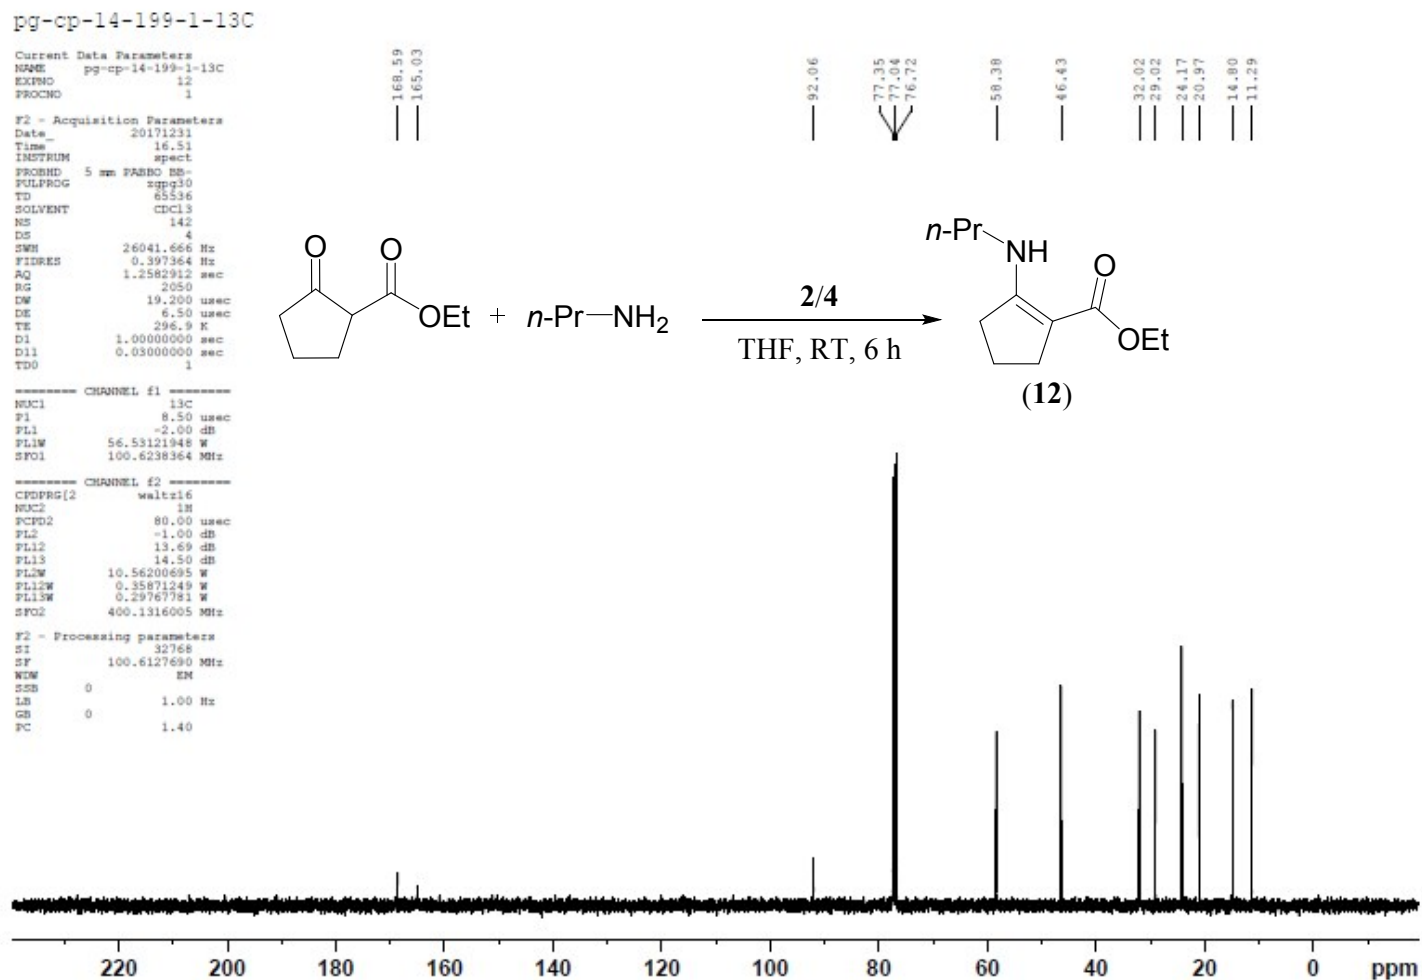

**Fig. S52**  $^{13}\text{C}\{^1\text{H}\}$  NMR spectrum of **12** in  $\text{CDCl}_3$  formed in the reaction of ethyl 2-oxocyclopentanecarboxylate and *n*-propyl amine as catalyzed by the dinuclear  $[\text{CoL}^1]_2$  (**2**) and  $[\text{CoL}^2]_2$  (**4**) complexes.

File : F:\GCMSDATA2017\DECEMBER-2017\PG-CP-14-199-1.D  
 Operator : CP  
 Acquired : 30 Dec 2017 16:15 using AcqMethod COMMON METHOD-2017.M  
 Instrument : GCMS  
 Sample Name: PG-CP-14-199-1  
 Misc Info :  
 Vial Number: 2

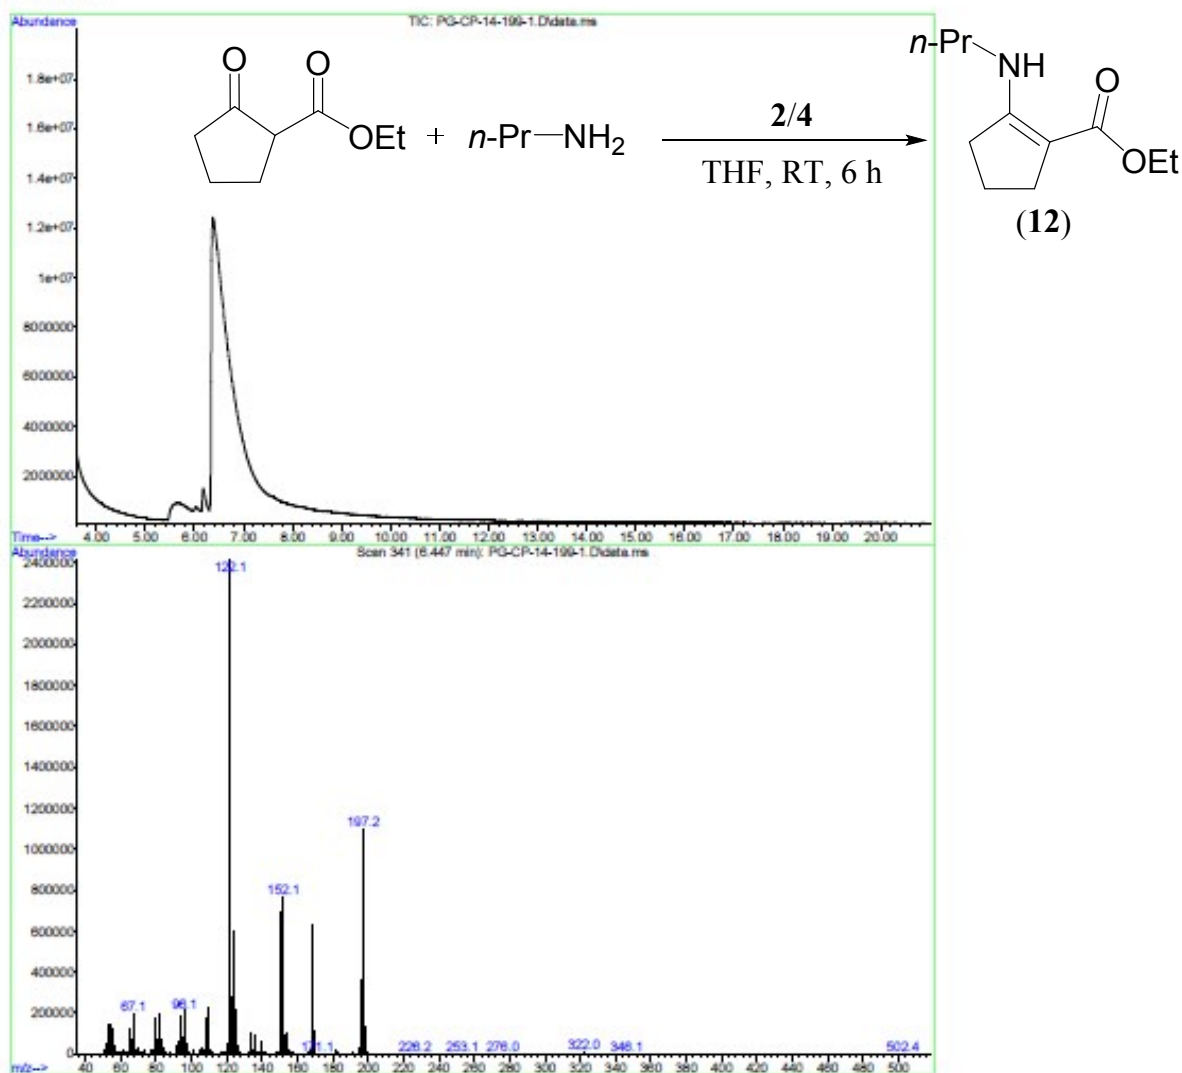

**Fig. S53** GCMS trace of **12** (*m/z* 197) in EtOAc formed in the reaction of ethyl 2-oxocyclopentanecarboxylate and *n*-propyl amine as catalyzed by the the dinuclear [CoL<sup>1</sup>]<sub>2</sub> (**2**) and [CoL<sup>2</sup>]<sub>2</sub> (**4**) complexes.

## Eager 300 Report

Page: 1 Sample: PG-CP-14-199-1 (PG-CP-14-199-1)

Method Name : PGCP30122017  
 Method File : D:\CHNS-2017\PGCP30122017.mth  
 Chromatogram : PG-CP-14-199-1  
 Operator ID : CHANDNI  
 Analysed : 12/30/2017 18:42  
 Sample ID : PG-CP-14-199-1 (# 12)  
 Analysis Type : UnkNown (Area)

Company Name : C.E. Instruments  
 Printed : 12/31/2017 22:04  
 Instrument N. : Instrument #1  
 Sample weight : 2.013

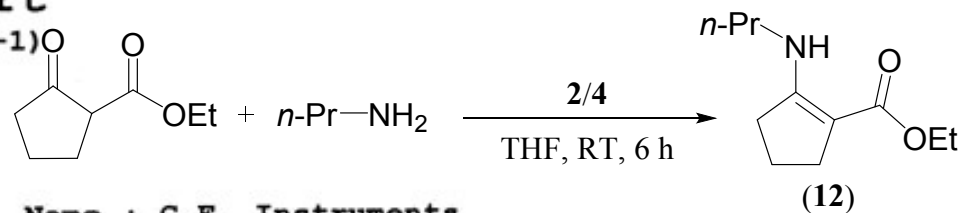

Calib. method : using 'K Factors'

!!! Warning missing one or more peaks.

| Element Name | %       | Ret.Time | Area    | BC | Area ratio | K factor    |
|--------------|---------|----------|---------|----|------------|-------------|
| 1            | 0.0000  | 2        | 135395  | RS |            | 0.0000      |
| Nitrogen     | 6.9002  | 42       | 150520  | RS | 23.062270  | .108364E+07 |
| Carbon       | 66.3992 | 62       | 3471333 | RS | 1.000000   | .259525E+07 |
| Hydrogen     | 10.0655 | 211      | 1347941 | RS | 2.575286   | .665260E+07 |
| Totals       | 83.3650 |          | 5105189 |    |            |             |

Fig. S54 Elemental analysis data of **12** formed in the reaction of ethyl 2-oxocyclopentanecarboxylate and *n*-propyl amine as catalyzed by the dinuclear [CoL<sup>1</sup>]<sub>2</sub> (**2**) and [CoL<sup>2</sup>]<sub>2</sub> (**4**) complexes.



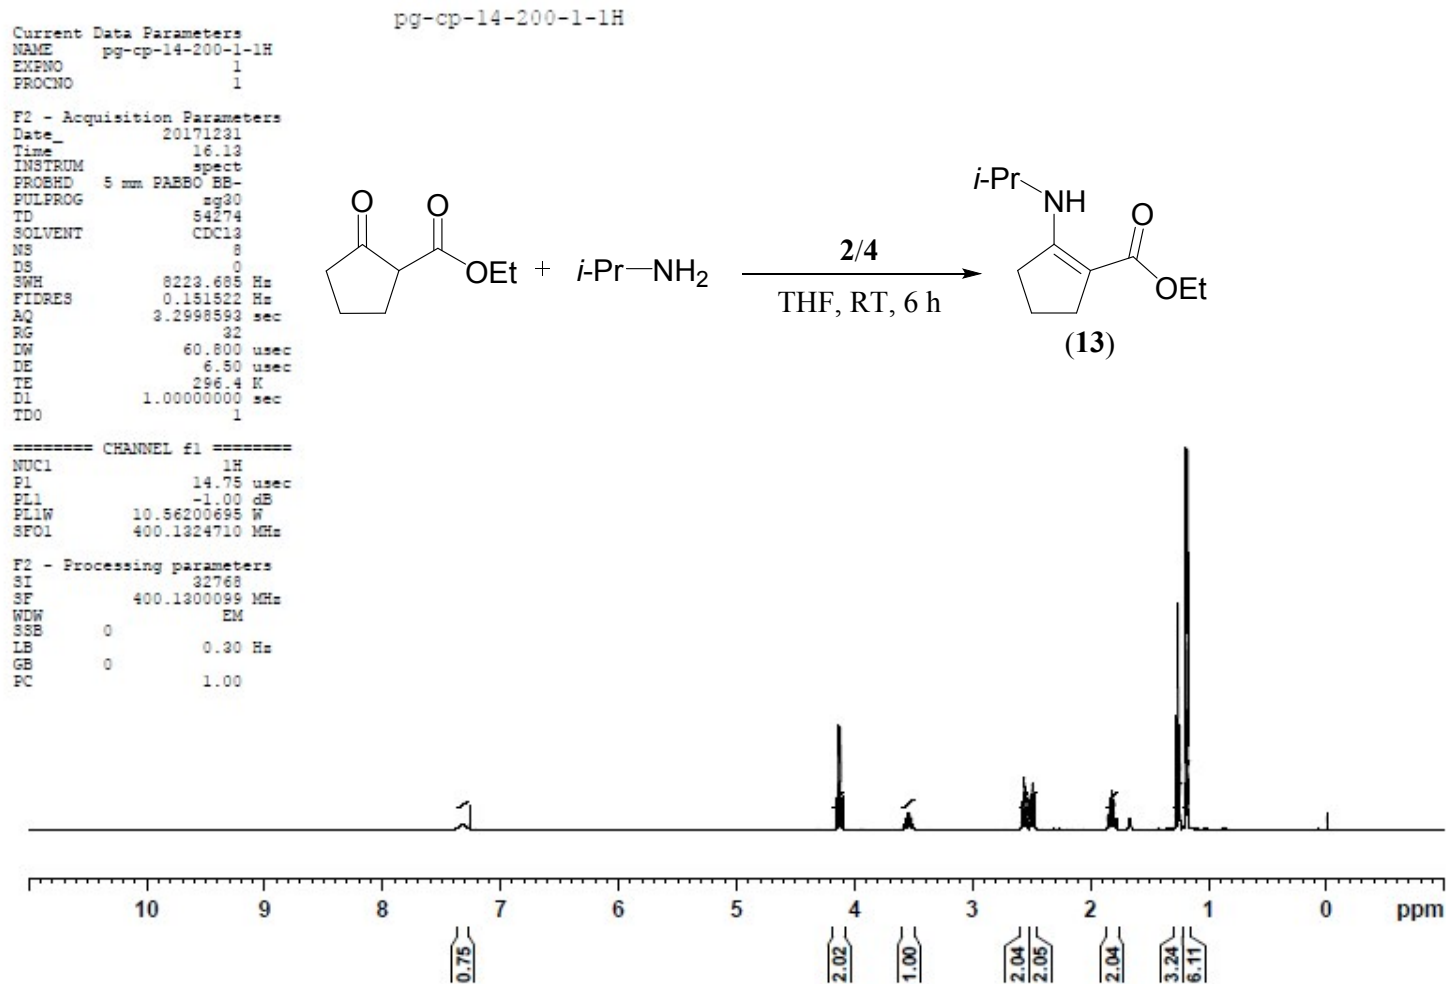

**Fig. S55**  $^1\text{H}$  NMR spectrum of **13** in  $\text{CDCl}_3$  formed in the reaction of ethyl 2-oxocyclopentanecarboxylate and *i*-propyl amine as catalyzed by the dinuclear  $[\text{CoL}^1]_2$  (**2**) and  $[\text{CoL}^2]_2$  (**4**) complexes.

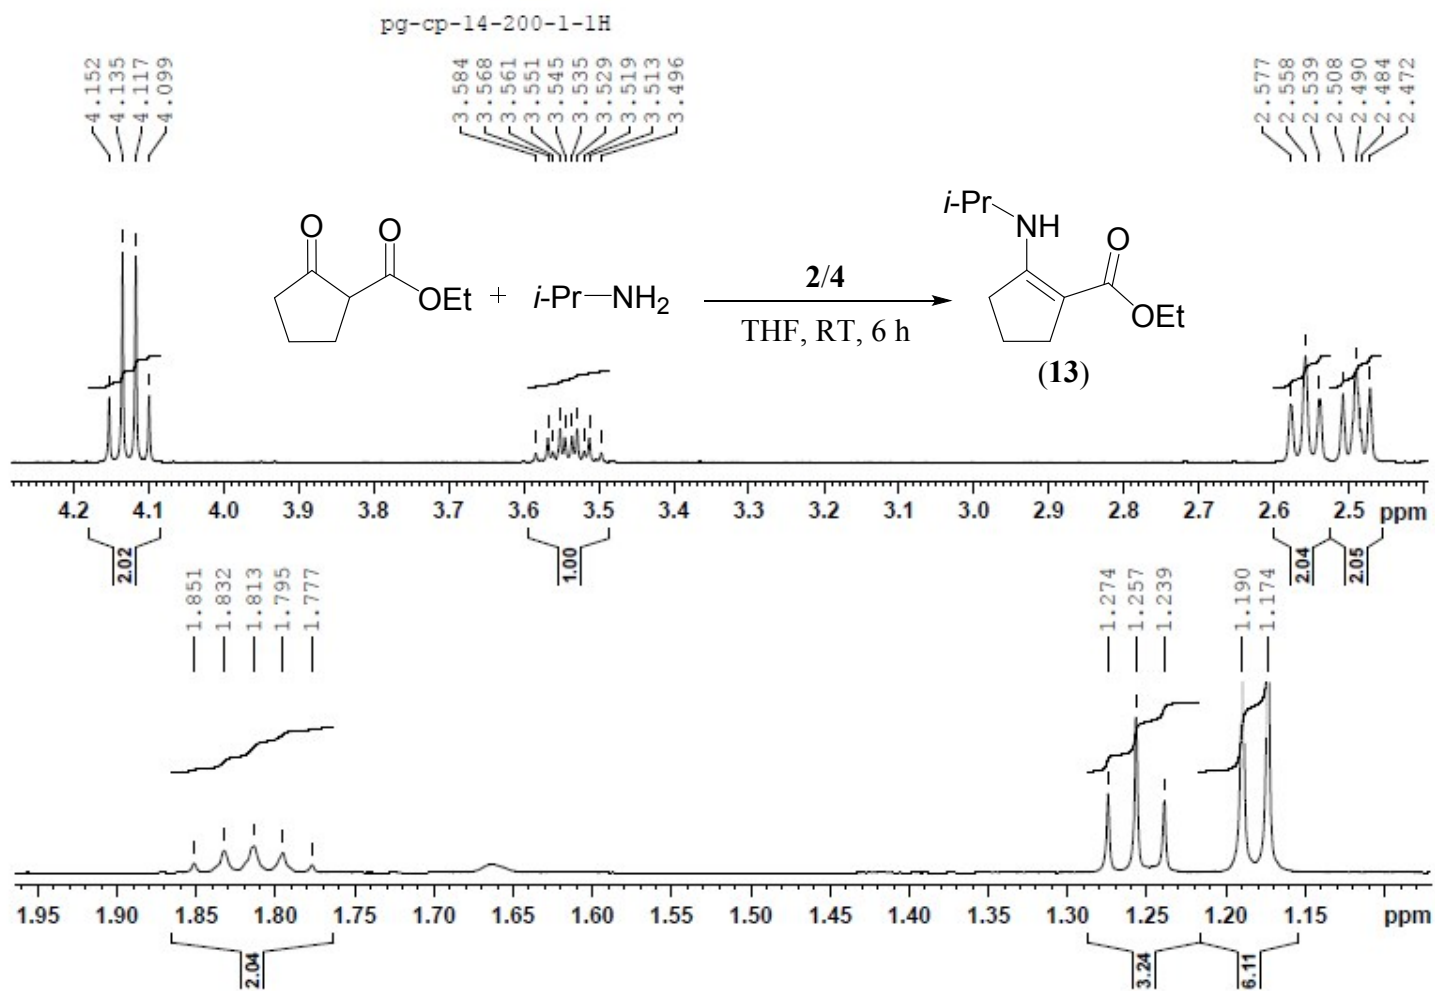

**Fig. S56** Expanded  $^1\text{H}$  NMR spectrum of **13** in  $\text{CDCl}_3$  formed in the reaction of ethyl 2-oxocyclopentanecarboxylate and *i*-propyl amine as catalyzed by the dinuclear  $[\text{CoL1}]_2$  (**2**) and  $[\text{CoL2}]_2$  (**4**) complexes.

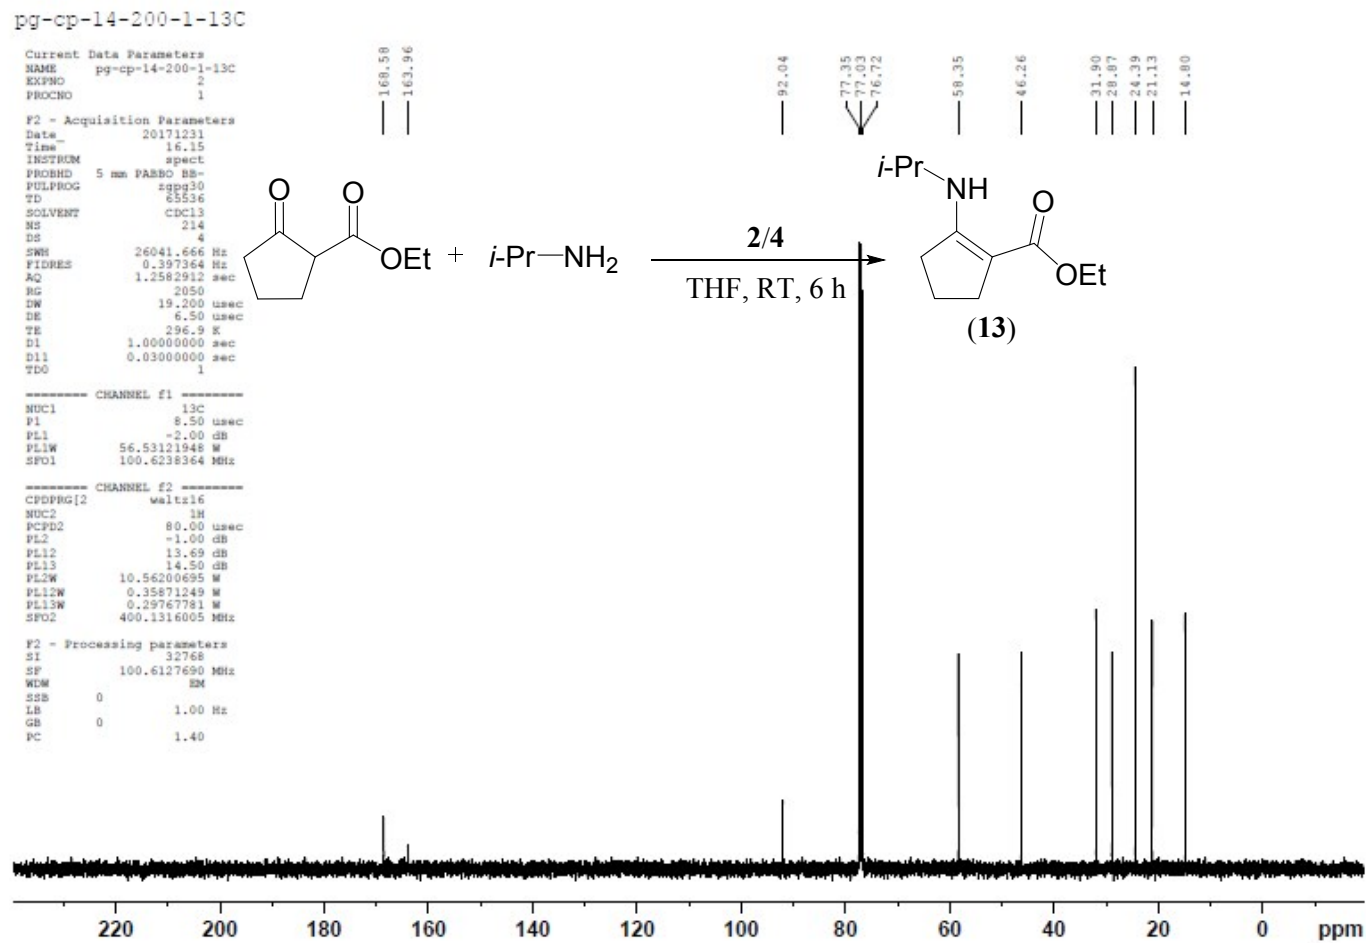

**Fig. S57**  $^{13}\text{C}\{^1\text{H}\}$  NMR spectrum of **13** in  $\text{CDCl}_3$  formed in the reaction of ethyl 2-oxocyclopentanecarboxylate and *i*-propyl amine as catalyzed by the dinuclear  $[\text{CoL}^1]_2$  (**2**) and  $[\text{CoL}^2]_2$  (**4**) complexes.

File : F:\GCMSDATA2017\DECEMBER-2017\PG-CP-14-200-1.D  
 Operator : APP  
 Acquired : 29 Dec 2017 23:27 using AcqMethod COMMON METHOD-2017.M  
 Instrument : GCMS  
 Sample Name : PG-CP-14-200-1  
 Misc Info :  
 Vial Number : 3

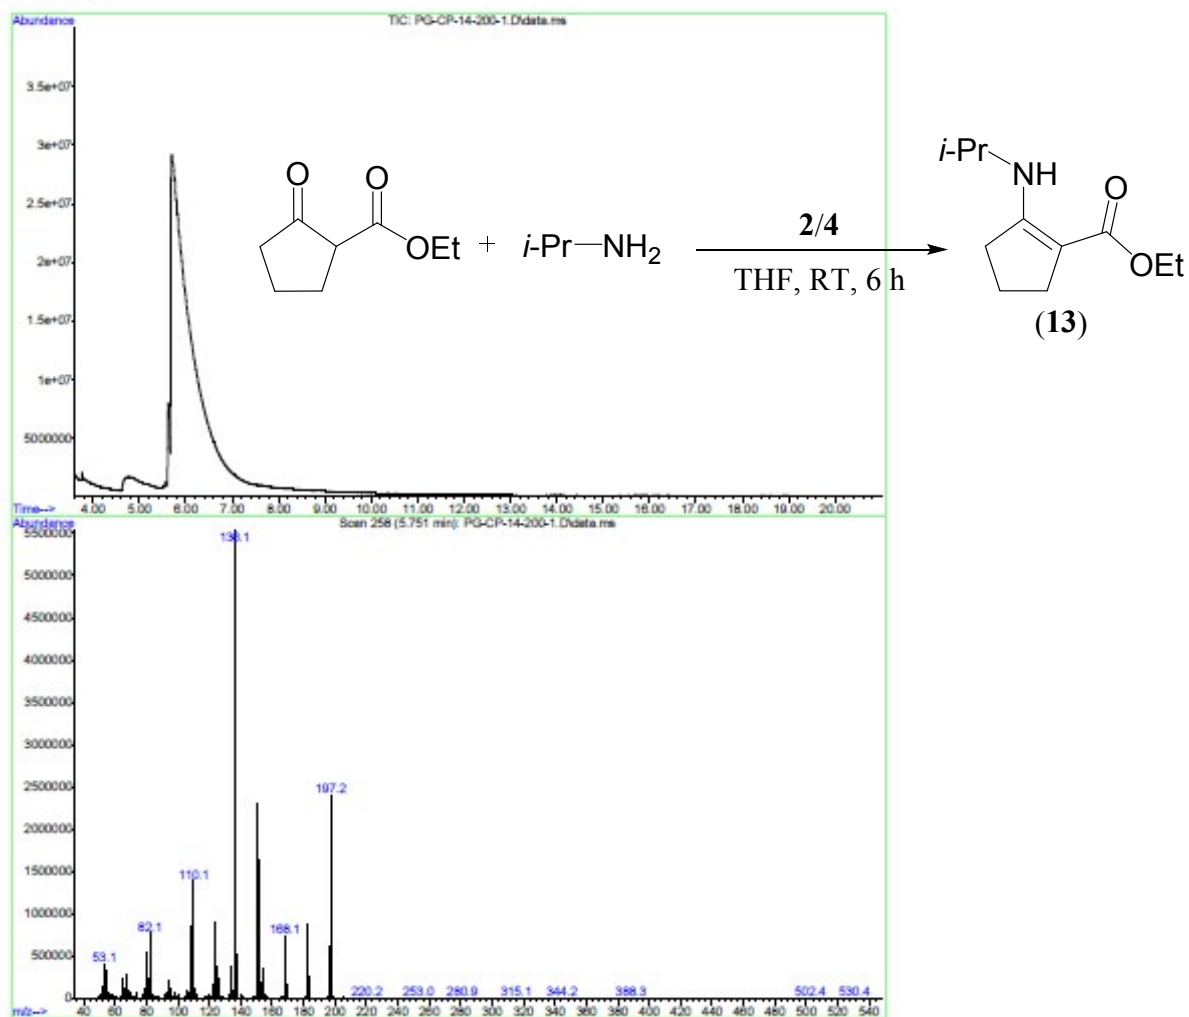

**Fig. S58** GCMS trace of **13** (m/z 197) in EtOAc formed in the reaction of ethyl 2-oxocyclopentanecarboxylate and *i*-propyl amine as catalyzed by the the dinuclear [CoL1]**2** (**2**) and [CoL2]**2** (**4**) complexes.

## Eager 300 Report

Page: 1    Sample: PG-CP-14-200-2 (PG-CP-14-200-2)

Method Name : PGCP30122017  
 Method File : D:\CHNS-2017\PGCP30122017.mth  
 Chromatogram : PG-CP-14-200-2  
 Operator ID : CHANDNI  
 Analysed : 12/30/2017 18:52  
 Sample ID : PG-CP-14-200-2 (# 13)  
 Analysis Type : UnkNown (Area)

Company Name : C.E. Instruments  
 Printed : 12/31/2017 22:05  
 Instrument N. : Instrument #1  
 Sample weight : 1.767

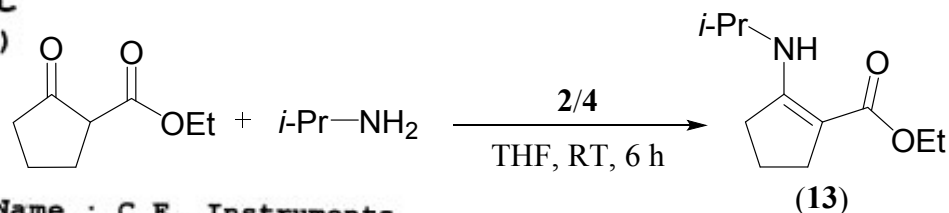

Calib. method : using 'K Factors'

!!! Warning missing one or more peaks.

| Element Name | %       | Ret. Time | Area    | BC | Area ratio | K factor    |
|--------------|---------|-----------|---------|----|------------|-------------|
| Nitrogen     | 6.8667  | 41        | 131484  | RS | 23.114010  | .108364E+07 |
| Carbon       | 66.2180 | 62        | 3039112 | RS | 1.000000   | .259525E+07 |
| Hydrogen     | 10.1263 | 202       | 1190365 | RS | 2.553092   | .665260E+07 |
| Totals       | 83.2111 |           | 4360960 |    |            |             |

Fig. S59 Elemental analysis data of **13** formed in the reaction of ethyl 2-oxocyclopentanecarboxylate and i-propyl amine as catalyzed by the dinuclear [CoL1]<sub>2</sub> (**2**) and [CoL2]<sub>2</sub> (**4**) complexes.

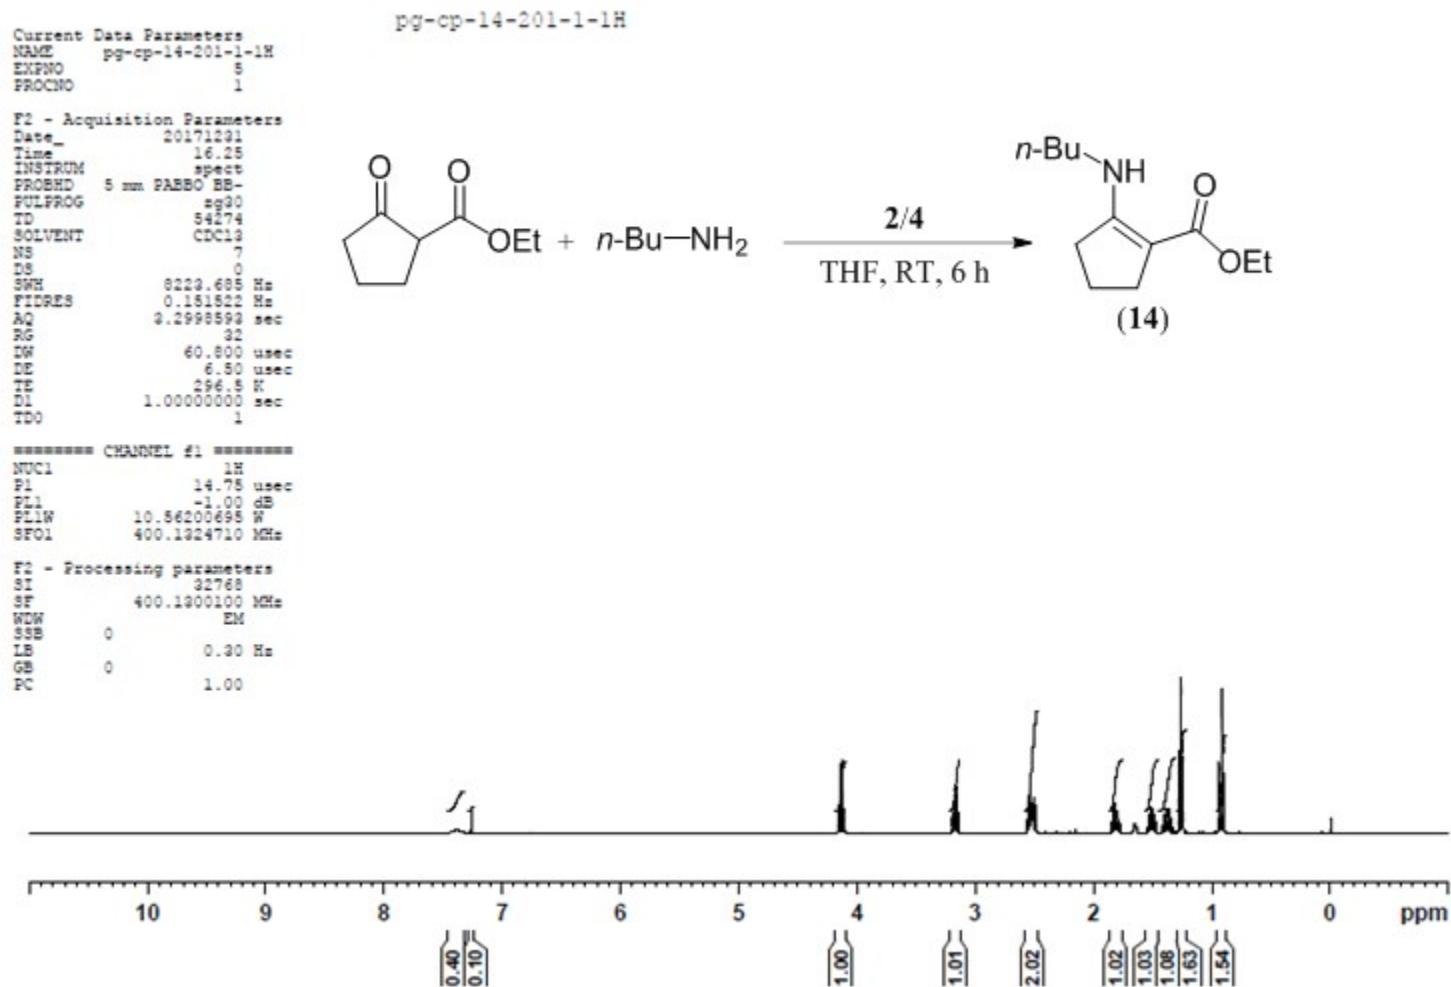

**Fig. S60**  $^1\text{H}$  NMR spectrum of **14** in  $\text{CDCl}_3$  formed in the reaction of ethyl 2-oxocyclopentanecarboxylate and *n*-butyl amine as catalyzed by the dinuclear  $[\text{CoL1}]_2$  (**2**) and  $[\text{CoL2}]_2$  (**4**) complexes.

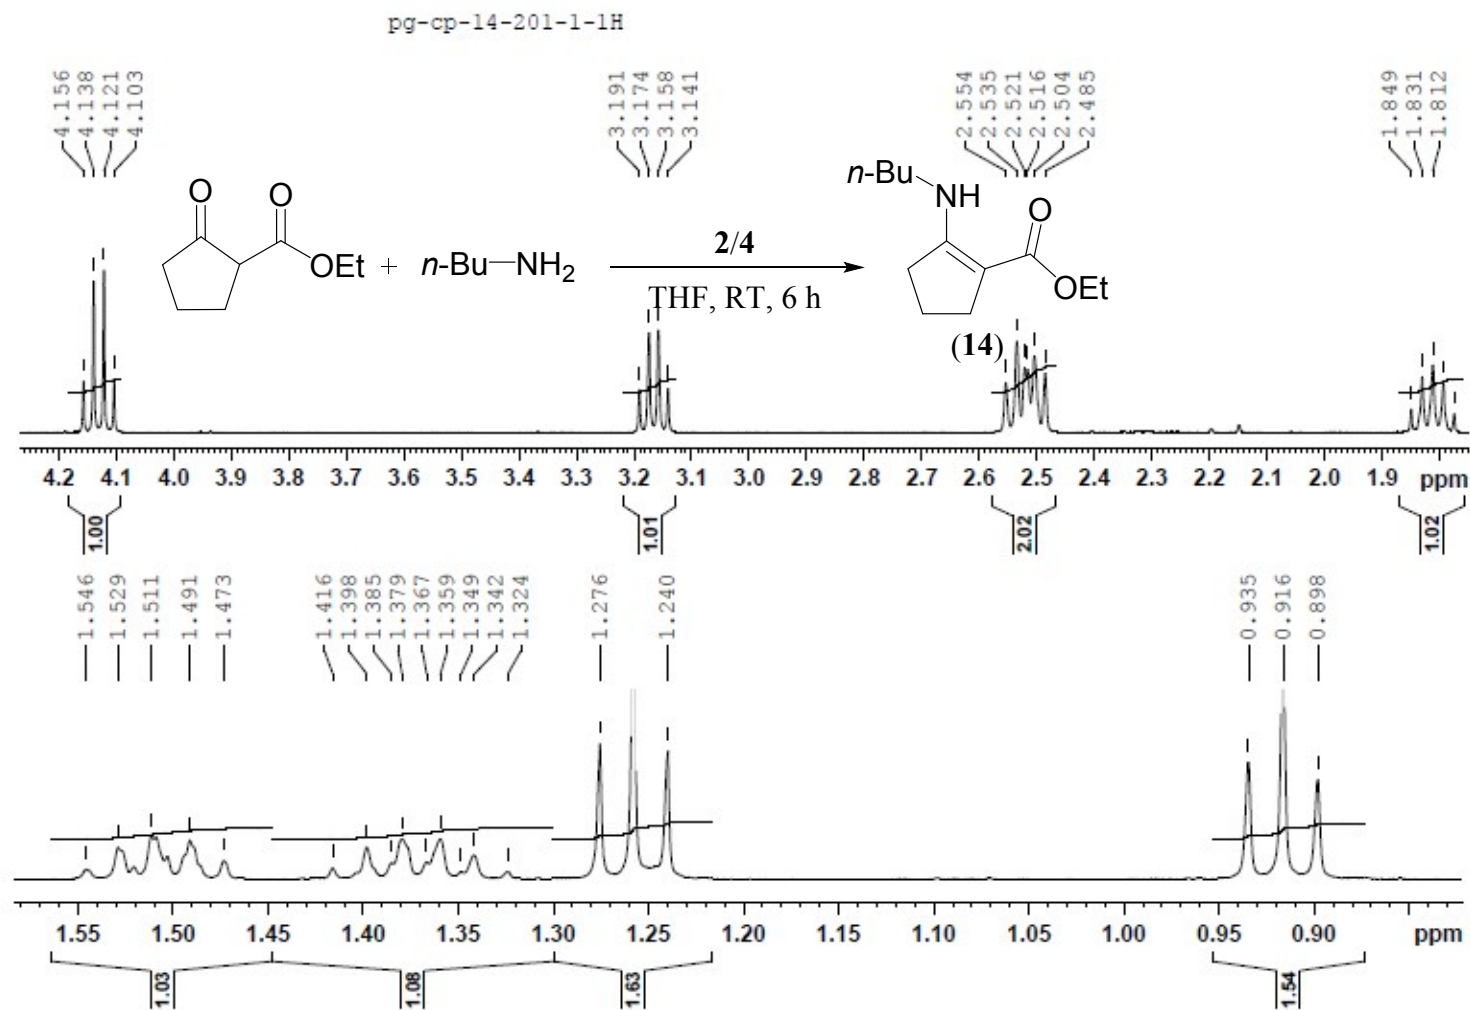

**Fig. S61** Expanded  $^1\text{H}$  NMR spectrum of **14** in  $\text{CDCl}_3$  formed in the reaction of ethyl 2-oxocyclopentanecarboxylate and *n*-butyl amine as catalyzed by the dinuclear  $[\text{CoL1}]_2$  (**2**) and  $[\text{CoL2}]_2$  (**4**) complexes.

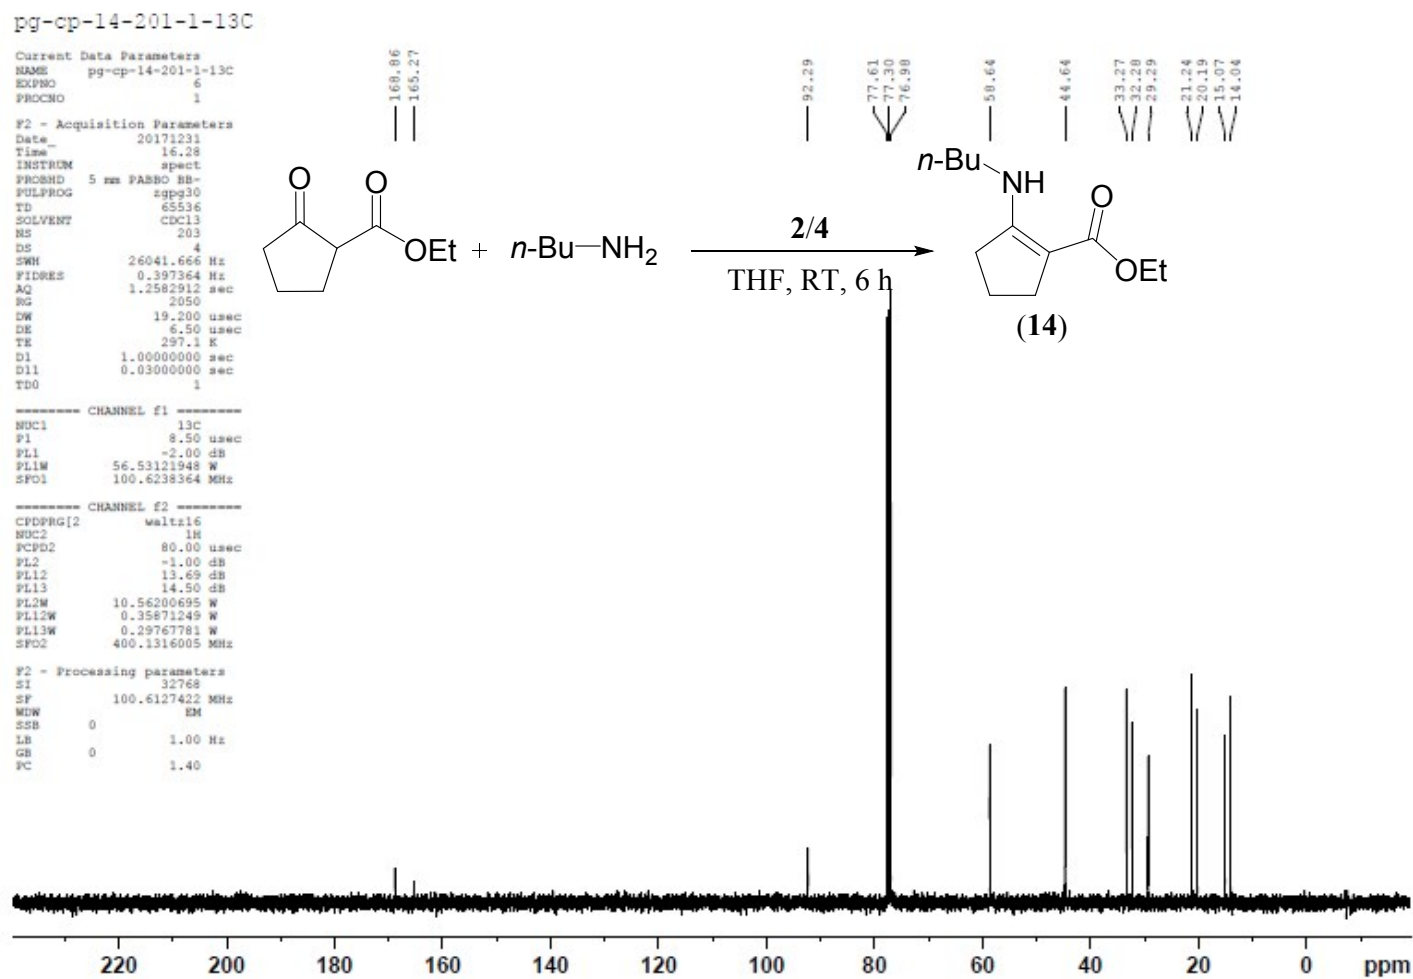

**Fig. S62**  $^{13}\text{C}\{^1\text{H}\}$  NMR spectrum of **14** in  $\text{CDCl}_3$  formed in the reaction of ethyl 2-oxocyclopentanecarboxylate and *n*-butyl amine as catalyzed by the dinuclear  $[\text{CoL}^1]_2$  (**2**) and  $[\text{CoL}^2]_2$  (**4**) complexes.



File : F:\GCMSDATA\2017\DECEMBER-2017\PG-CP-14-201-1.D  
 Operator : APP  
 Acquired : 30 Dec 2017 00:43 using AcqMethod COMMON METHOD-2017.M  
 Instrument : GCMS  
 Sample Name: PG-CP-14-201-1  
 disc Info :  
 Vial Number: 5

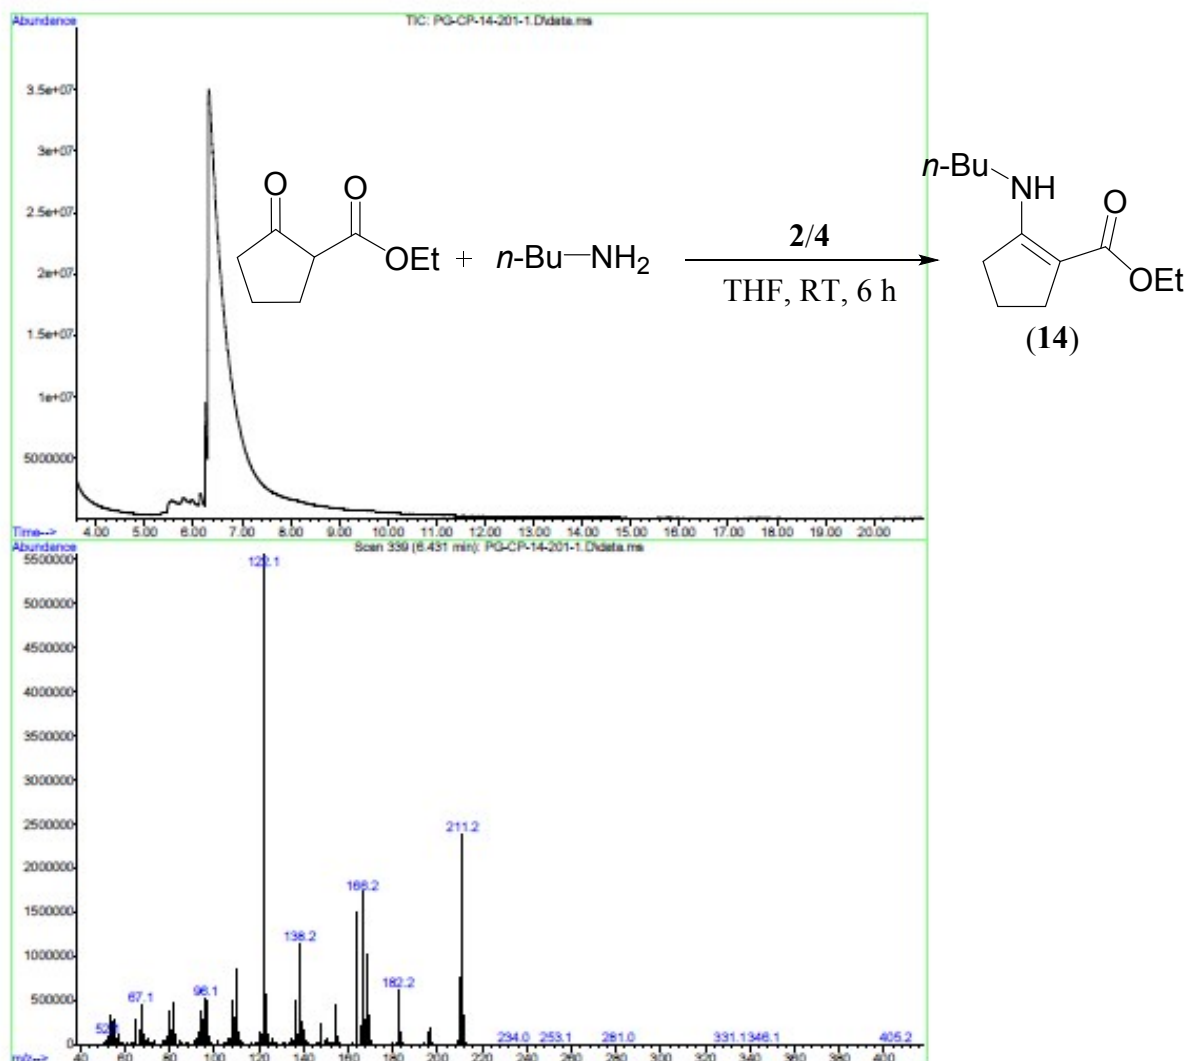

**Fig. S63** GCMS trace of **14** (m/z 211) in EtOAc formed in the reaction of ethyl 2-oxocyclopentanecarboxylate and n-butyl amine as catalyzed by the the dinuclear [CoL1]**2** (**2**) and [CoL2]**2** (**4**) complexes.

## Eager 300 Report

Page: 1 Sample: PG-CP-14-201-1 (PG-CP-14-201-1)

Method Name : PGCP30122017  
 Method File : D:\CHNS-2017\PGCP30122017.mth  
 Chromatogram : PG-CP-14-201-1  
 Operator ID : CHANDNI  
 Analysed : 12/30/2017 19:22  
 Sample ID : PG-CP-14-201-1 (# 16)  
 Analysis Type : UnkNown (Area)

Company Name : C.E. Instruments  
 Printed : 12/31/2017 22:05  
 Instrument N. : Instrument #1  
 Sample weight : 1.565

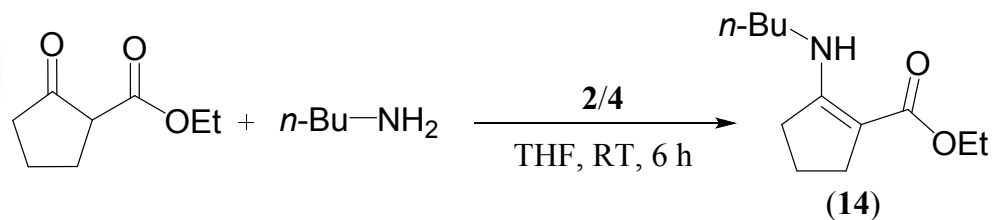

Calib. method : using 'K Factors'

!!! Warning missing one or more peaks.

| Element Name | %       | Ret.Time | Area    | BC | Area ratio | K factor    |
|--------------|---------|----------|---------|----|------------|-------------|
| 1            | 0.0000  | 2        | 131749  | RS |            | 0.0000      |
| Nitrogen     | 6.5050  | 41       | 110319  | RS | 24.843690  | .108364E+07 |
| Carbon       | 67.4186 | 62       | 2740732 | RS | 1.000000   | .259525E+07 |
| Hydrogen     | 10.2791 | 199      | 1070187 | RS | 2.560984   | .665260E+07 |
| Totals       | 84.2027 |          | 4052987 |    |            |             |

**Fig. S64** Elemental analysis data of **14** formed in the reaction of ethyl 2-oxocyclopentanecarboxylate and *n*-butyl amine as catalyzed by the dinuclear [CoL<sup>1</sup>]<sub>2</sub> (**2**) and [CoL<sup>2</sup>]<sub>2</sub> (**4**) complexes.

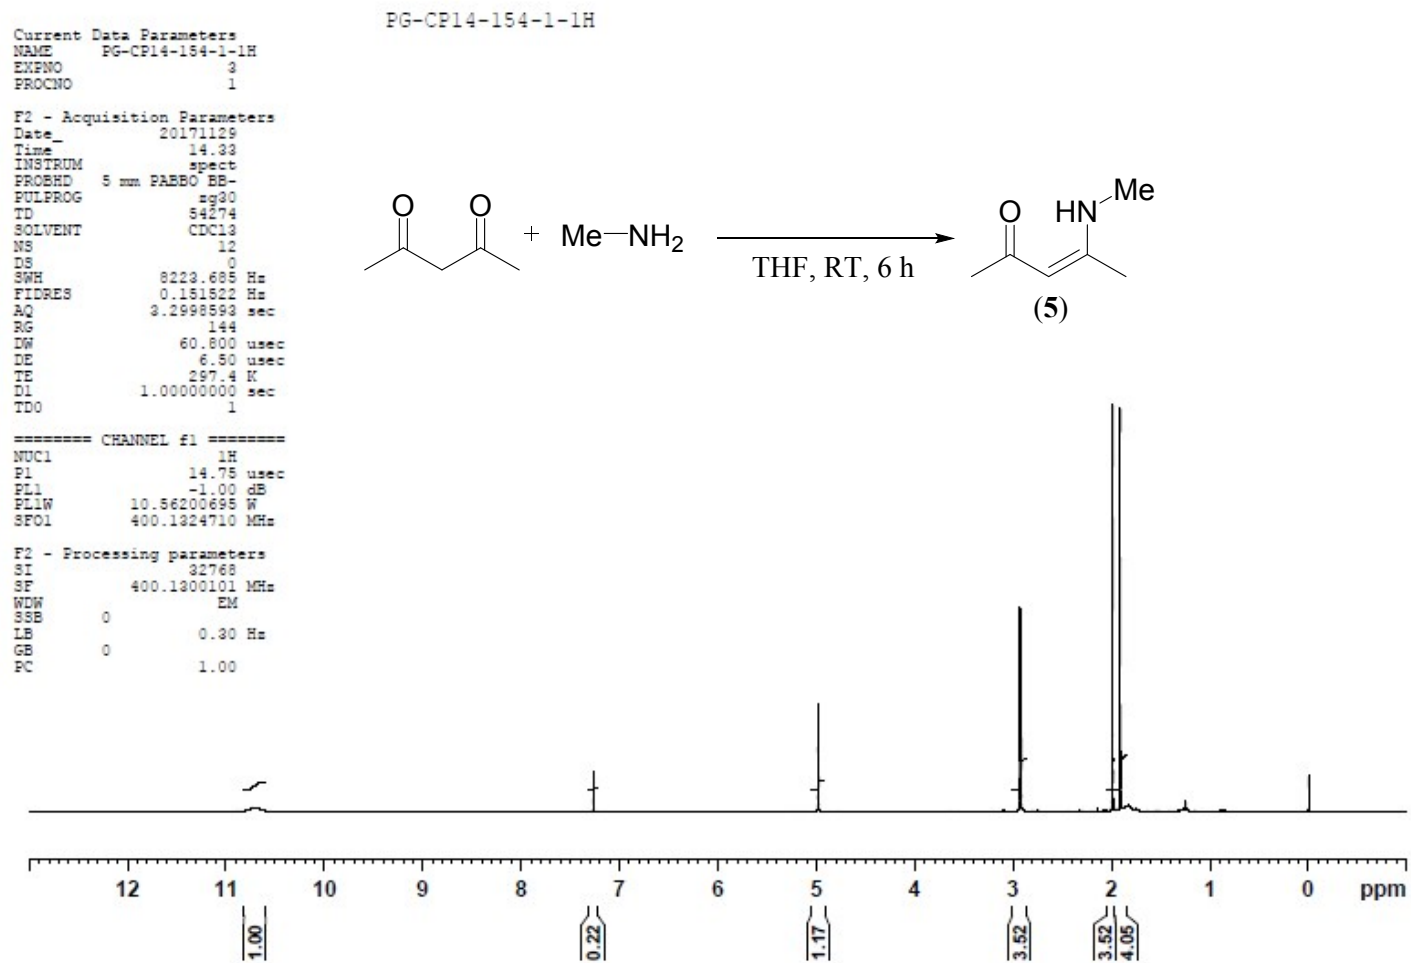

**Fig. S65**  $^1\text{H}$  NMR spectrum of **5** in  $\text{CDCl}_3$  formed in the reaction of acetyl acetone and methyl amine.

File : F:\GCMSDATA2017\November2017\PG-CP-14-154-1.D  
Operator : CP  
Acquired : 29 Nov 2017 15:22 using AcqMethod COMMON METHOD-2017.M  
Instrument : GCMS  
Sample Name : PG-CP-14-154-1  
Misc Info :  
Vial Number : 1

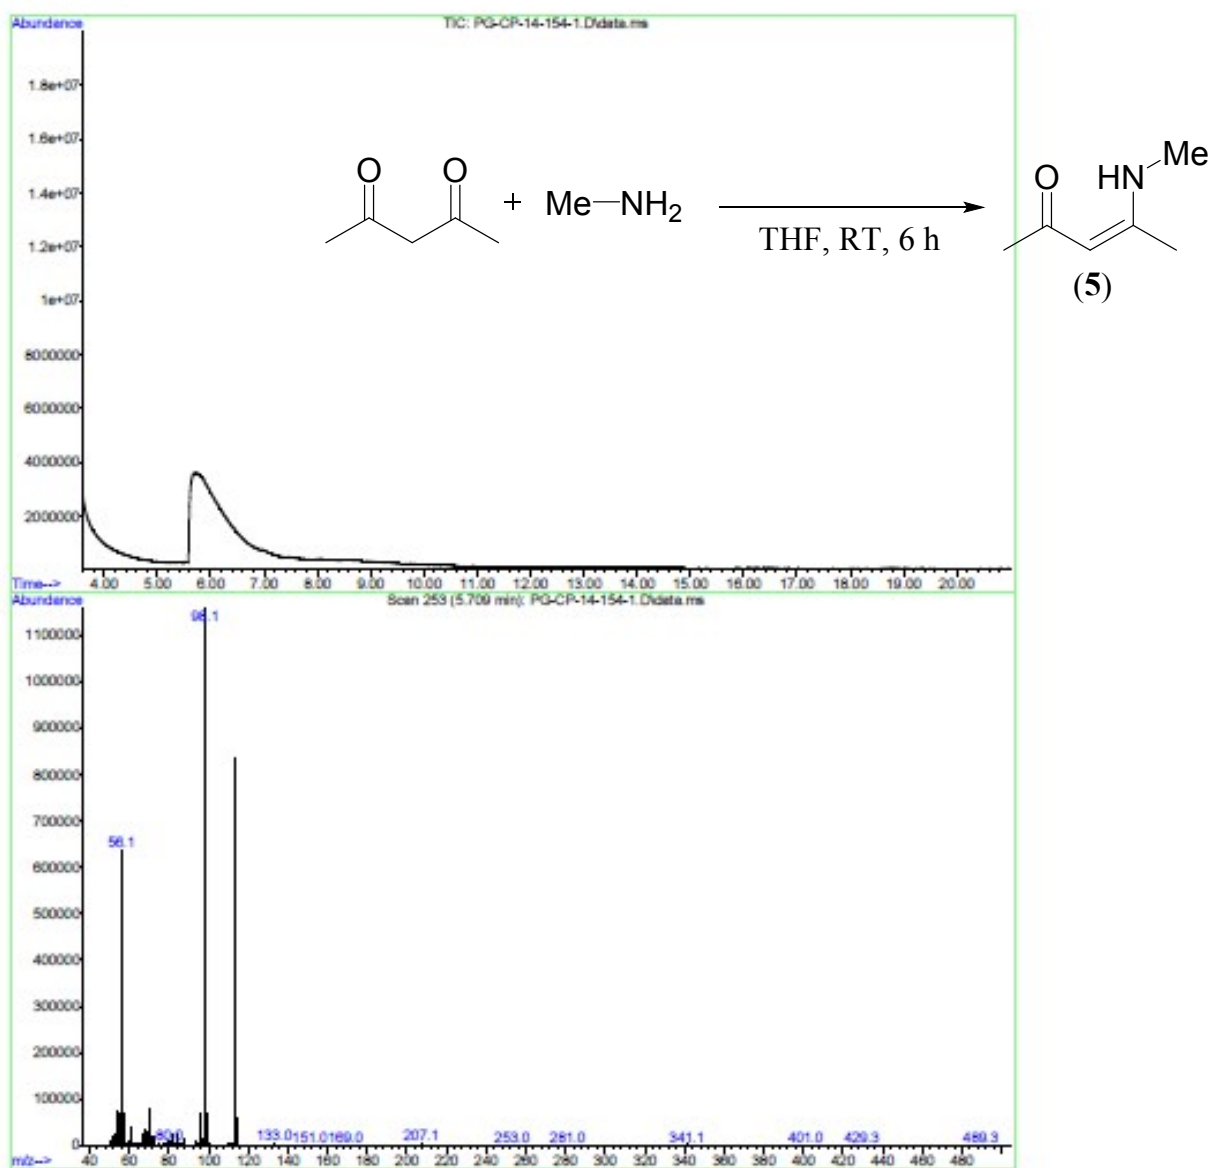

**Fig. S66** GCMS trace of 5 ( $m/z$  113) in EtOAc formed in the reaction of acetyl acetone and methyl amine.

Current Data Parameters  
NAME PG-CP-14-155-1-1H  
EXPNO 4  
PROCNO 1

PG-CP-14-155-1-1H

F2 - Acquisition Parameters  
Date\_ 20171129  
Time\_ 14.40  
INSTRUM spect  
PROBHD 5 mm PABBO BB-  
PULPROG zg30  
TD 54274  
SOLVENT CDCl3  
NS 12  
DS 0  
SWH 8223.685 Hz  
FIDRES 0.151522 Hz  
AQ 3.2998593 sec  
RG 144  
DW 60.800 usec  
DE 6.50 usec  
TE 297.4 K  
D1 1.00000000 sec  
TDO 1

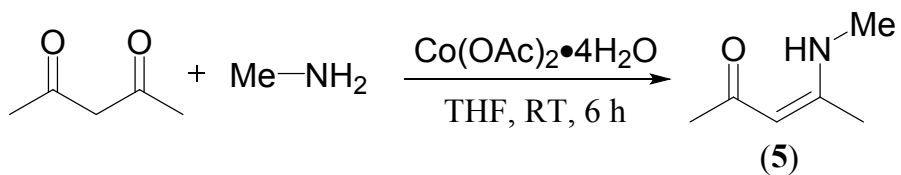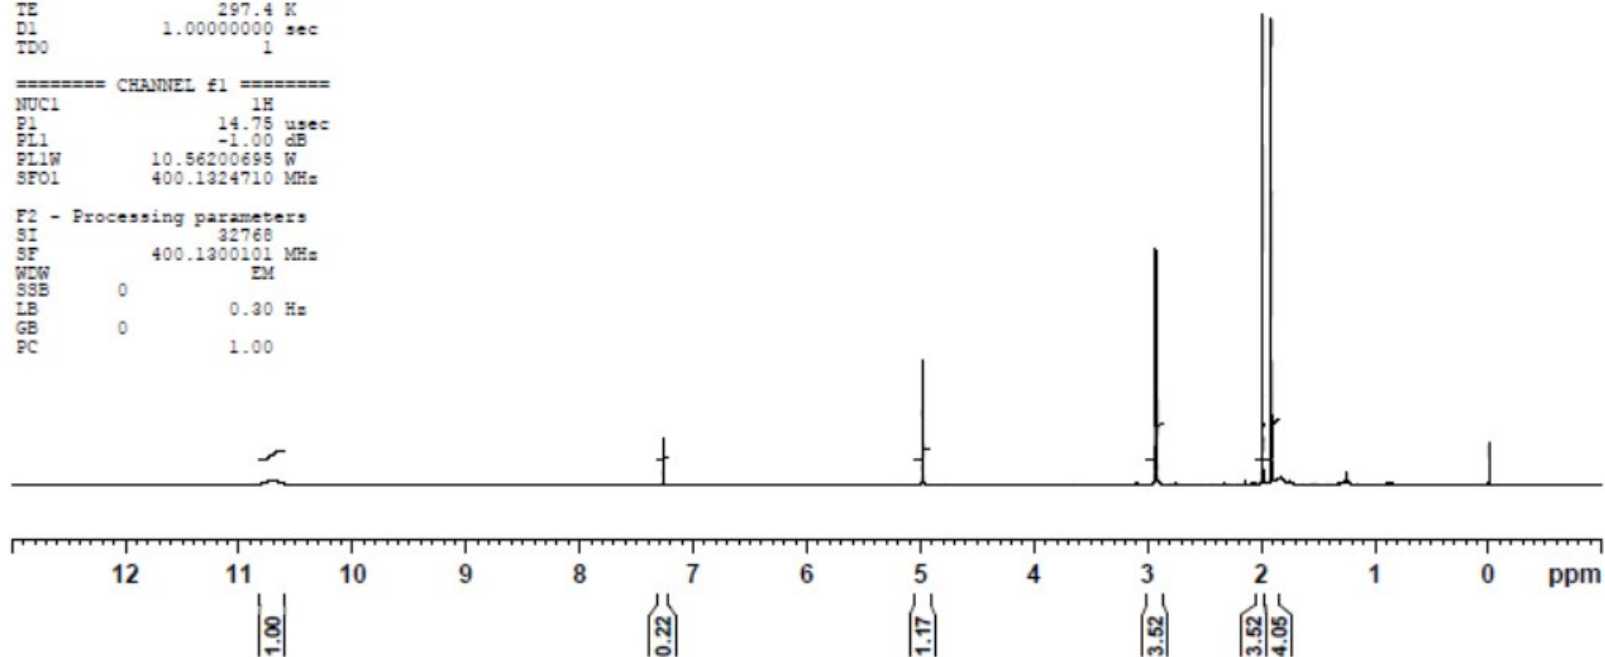

Fig. S67 <sup>1</sup>H NMR spectrum of **5** in CDCl<sub>3</sub> formed in the reaction of acetyl acetone and methyl amine as catalyzed by Co(OAc)<sub>2</sub>•4H<sub>2</sub>O.

File : F:\GCMSDATA2017\November2017\PG-CP-14-155-1.D  
Operator : CP  
Acquired : 29 Nov 2017 15:47 using AcqMethod COMMON METHOD-2017.M  
Instrument : GCMS  
Sample Name: PG-CP-14-155-1  
disc Info :  
Vial Number: 2

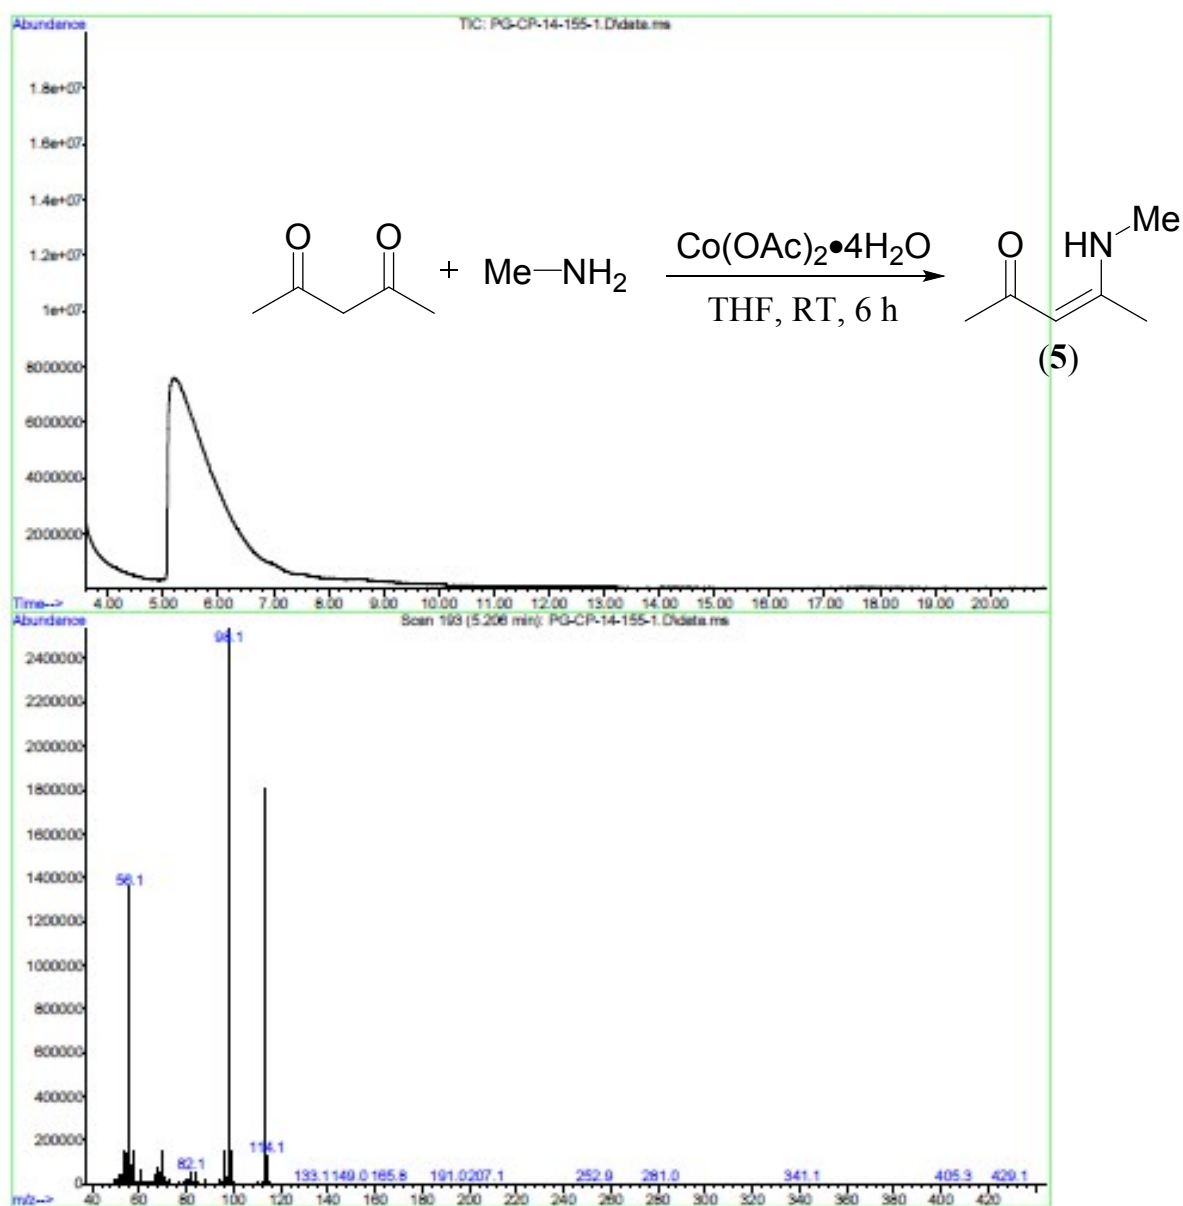

**Fig. S68** GCMS trace of **5** (m/z 113) in EtOAc formed in the reaction of acetyl acetone and methyl amine as catalyzed by Co(OAc)<sub>2</sub>•4H<sub>2</sub>O.

Current Data Parameters  
NAME PG-CP-14-167-1-1H  
EXPNO 5  
PROCNO 1

PG-CP-14-167-1-1H

F2 - Acquisition Parameters  
Date\_ 20171207  
Time 17.23  
INSTRUM spect  
PROBHD 5 mm PAHBO BB/  
PULPROG zg30  
TD 65536  
SOLVENT CDCl3  
NS 7  
DS 2  
SWH 10000.000 Hz  
FIDRES 0.152588 Hz  
AQ 3.2767999 sec  
RG 30.72  
DW 50.000 usec  
DE 6.50 usec  
TE 298.2 K  
D1 1.00000000 sec  
TDD 1

----- CHANNEL f1 -----  
SFO1 500.1330885 MHz  
NUC1 1H  
P1 13.35 usec  
PLW1 16.00000000 W

F2 - Processing parameters  
SI 65536  
SF 500.1300000 MHz  
WDW EM  
SSB 0  
LB 0.30 Hz  
GB 0  
PC 1.00

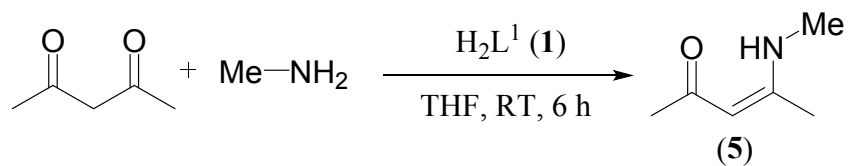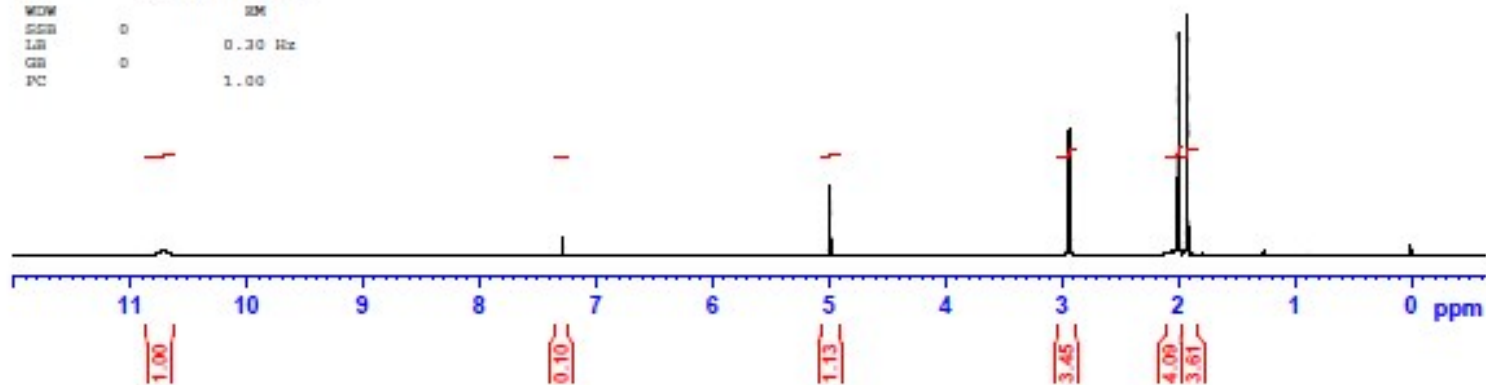

Fig. S69 <sup>1</sup>H NMR spectrum of 5 in CDCl<sub>3</sub> formed in the reaction of acetyl acetone and methyl amine as catalyzed by H<sub>2</sub>L<sup>1</sup> (1).

File : F:\GCMSDATA2017\DECEMBER-2017\pg-cp-14-167-3.D  
Operator :  
Acquired : 6 Dec 2017 20:48 using AcqMethod COMMON METHOD-2017.M  
Instrument : GCMS  
Sample Name: pg-cp-14-167-3  
Disc Info :  
Vial Number: 1

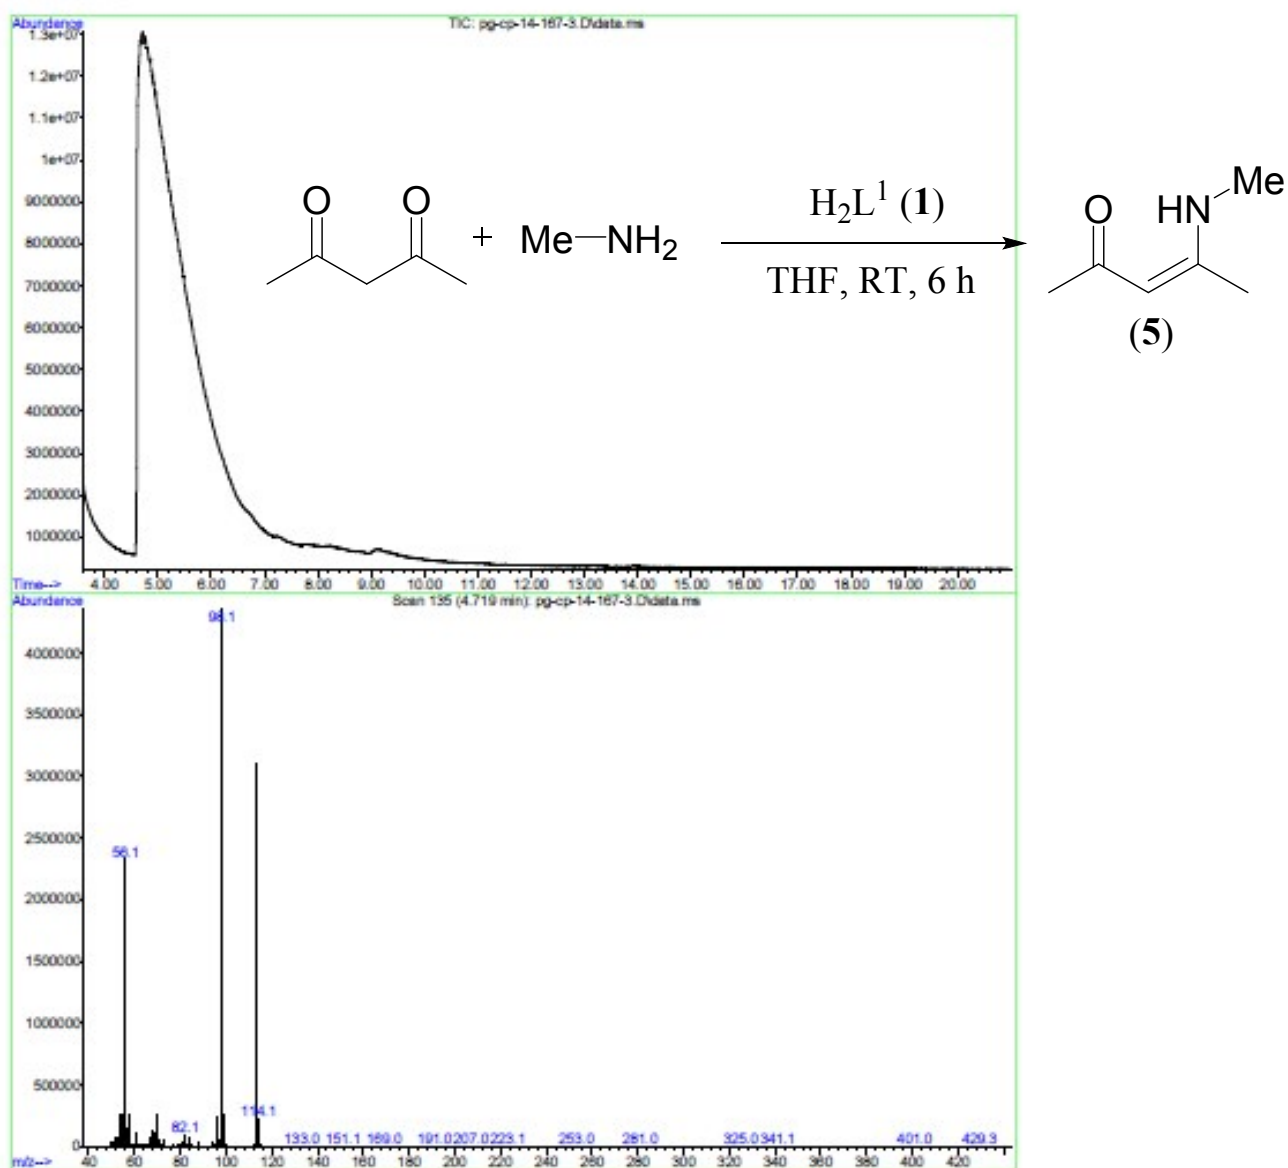

**Fig. S70** GCMS trace of **5** ( $m/z$  113) in EtOAc formed in the reaction of acetyl acetone and methyl amine as catalyzed by H<sub>2</sub>L<sup>1</sup> (**1**).



Current Data Parameters  
NAME PG-CP-14-194-1-1H  
EXPNO 1  
PROCNO 1

PG-CP-14-194-1-1H

F2 - Acquisition Parameters  
Date\_ 20171226  
Time 17.16  
INSTRUM spect  
PROBHD 5 mm PABBO BB/  
PULPROG zgpg30  
TD 65536  
SOLVENT CDCl3  
NS 13  
DS 2  
SWH 10000.000 Hz  
FIDRES 0.162888 Hz  
AQ 3.2767889 sec  
RG 30.72  
DW 50.000 usec  
DE 6.50 usec  
TE 299.0 K  
D1 1.00000000 sec  
TDO 1

===== CHANNEL f1 =====  
SFO1 500.1330885 MHz  
NUC1 1H  
P1 13.35 usec  
PLW1 16.00000000 W

F2 - Processing parameters  
SI 65536  
SF 500.1300135 MHz  
WDW EM  
SSB 0  
LB 0.30 Hz  
GB 0  
WC 1.00

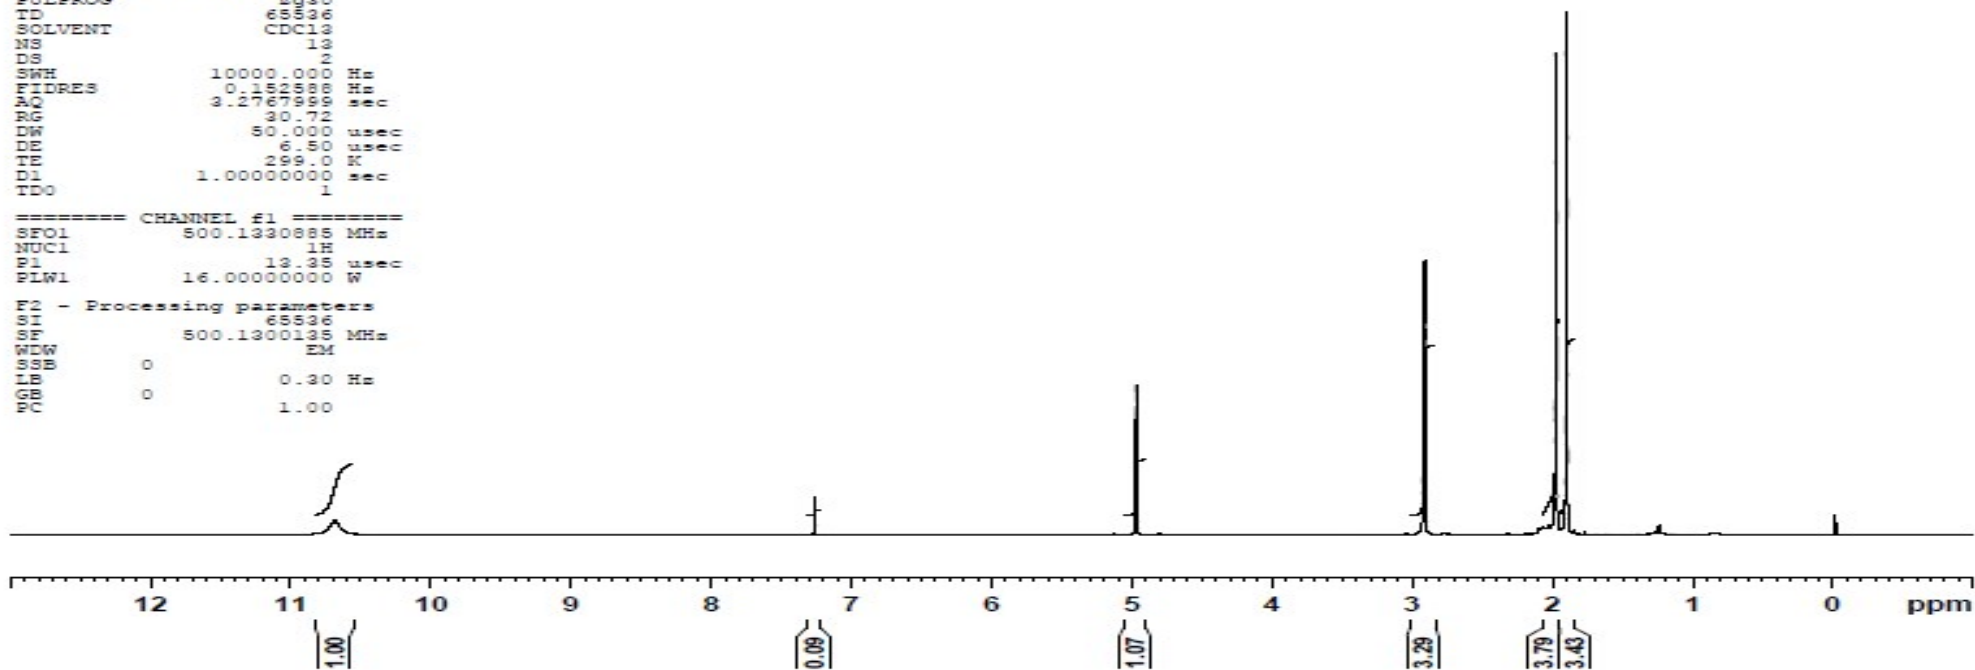

Fig. S71  $^1\text{H}$  NMR spectrum of 5 in  $\text{CDCl}_3$  formed in the reaction of acetyl acetone and methyl amine as catalyzed by  $\text{H}_2\text{L}^2$  (3).

```

Current Data Parameters
NAME      PG-CP-14-156-1-1H
EXPNO     1
PROCNO    1

F2 - Acquisition Parameters
Date_     20171202
Time      8.07
INSTRUM   spect
PROBHD    5 mm PABBO BB-
PULPROG   zg30
TD         54274
SOLVENT   CDCl3
NS         6
DS         0
SWH        8223.685 Hz
FIDRES     0.151522 Hz
AQ         3.2998593 sec
RG         144
DM         60.800 usec
DE         6.50 usec
TE         297.1 K
D1         1.00000000 sec
TDO        1

===== CHANNEL f1 =====
NUC1       1H
P1         14.75 usec
PL1        -1.00 dB
PL1W       10.56200695 W
SF01       400.1324710 MHz

F2 - Processing parameters
SI         32768
SF         400.1300101 MHz
WDW        EM
SSB        0
LB         0.30 Hz
GB         0
PC         1.00

```

PG-CP-14-156-1-1H

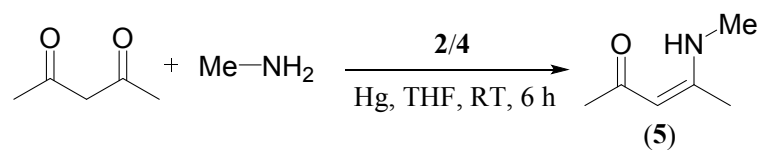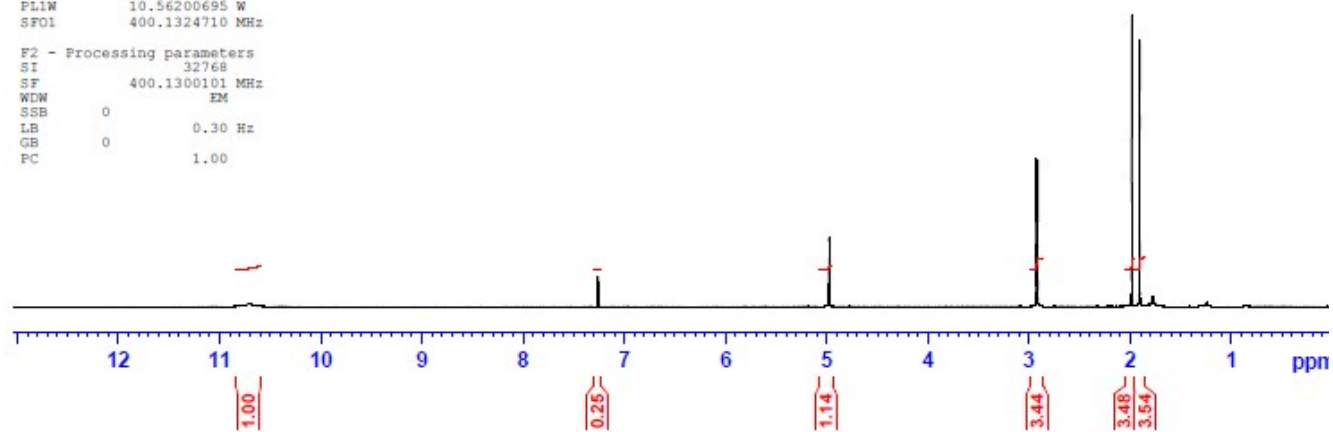

**Fig. S72** <sup>1</sup>H NMR spectrum of **5** in CDCl<sub>3</sub> formed in the reaction of acetyl acetone and methyl amine as catalyzed by the dinuclear [CoL1]**2** (**2**) and [CoL2]**2** (**4**) complexes in the presence of Hg.

File : F:\GCMSDATA2017\November2017\PG-CP-14-156-2.D  
 Operator : CP  
 Acquired : 30 Nov 2017 21:25 using AcqMethod COMMON METHOD-2017.M  
 Instrument : GCMS  
 Sample Name : PG-CP-14-156-2  
 Disc Info :  
 Vial Number : 4

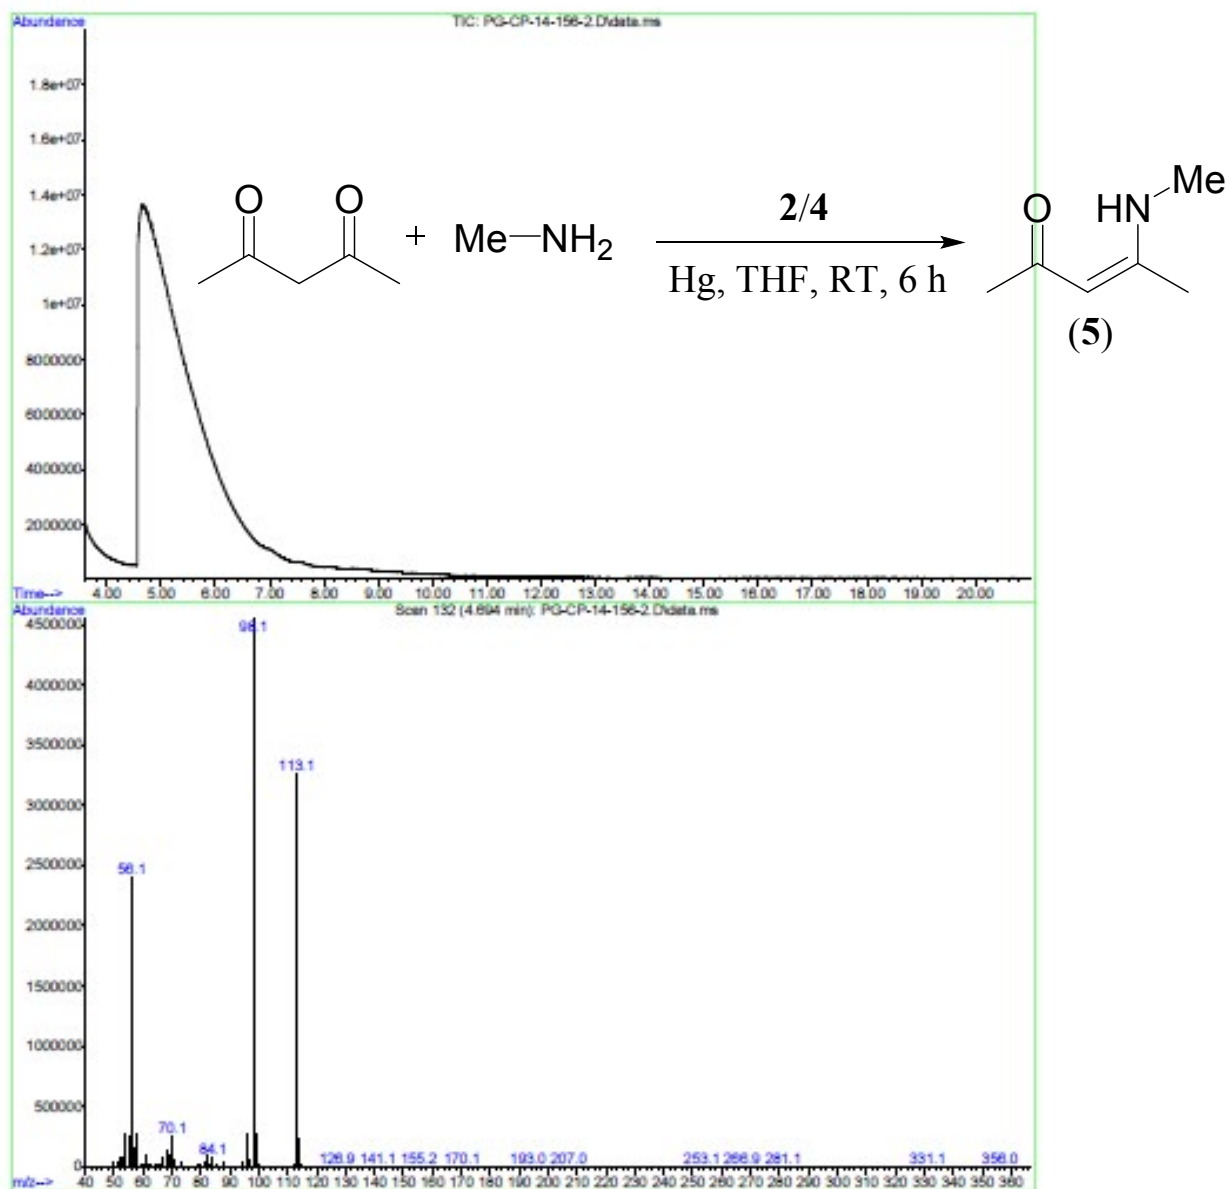

**Fig. S73** GCMS trace of **5** ( $m/z$  113) in EtOAc formed in the reaction of acetyl acetone and methyl amine as catalyzed by the dinuclear [CoL<sup>1</sup>]<sub>2</sub> (**2**) and [CoL<sup>2</sup>]<sub>2</sub> (**4**) complexes in the presence of Hg.
